# Supplementary material
Source: MDPI journal article supplement (https://www.mdpi.com/2078-2489/16/10/904)
Supplement: s1 [file information-3856392-supplementary.pdf › information-3856392-supplementary.pdf]

# 1. University Website

## 1.1. Massachusetts Institute of Technology [1]

### 1.1.1. Undetectable AI

#### Advanced AI Detector and Humanizer [undetectable AI]

Rated #1 Best AI Detector by Forbes! Use our AI detector to check if your text will be flagged as AI-written content. Then, click 'humanize' to remove AI detection and ensure your text will bypass all major AI detectors. Our AI text humanizer does this by enhancing your content to match the quality of human writing.

READABILITY

University

PURPOSE

General Writing

821/15000 CHARS = 123 WORDS

The MIT community is driven by a shared purpose: to make a better world through education, research, and innovation. We are fun and quirky, elite but not elitist, inventive and artistic, obsessed with numbers, and welcoming to talented people regardless of where they come from.

Founded to accelerate the nation's industrial revolution, MIT is profoundly American. With ingenuity and drive, our graduates have invented fundamental technologies, launched new industries, and created millions of American jobs. At the same time, and without the slightest sense of contradiction, MIT is profoundly global. Our community gains tremendous strength as a magnet for talent from around the world. Through teaching, research, and innovation, MIT's exceptional community pursues its mission of service to the nation and the world.

⋮ WAITING FOR YOUR INPUT

MORE READABLE ⓘ

BALANCED ⓘ

MORE HUMAN ⓘ

☒ I AGREE TO THE TERMS OF SERVICE (NO ACADEMIC MISCONDUCT)

CLEAR

CHECK FOR AI

HUMANIZE

⚠ Your content is detected as written by AI ⚠

AI DETECTION LIKELIHOOD

🚩 GPTZERO 🚩 OPENAI 🚩 WRITER 🚩 CROSSPLAG 🚩 COPYLEAKS 🚩 SAPLING 🚩 CONTENTATSCALE 🚩 ZEROGPT

KEY: 100% HUMAN 50% HUMAN 0% HUMAN

### 1.1.2. Zero GPT.com

Your Text is AI/GPT Generated

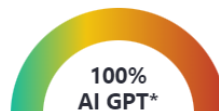

The MIT community is driven by a shared purpose: to make a better world through education, research, and innovation. We are fun and quirky, elite but not elitist, inventive and artistic, obsessed with numbers, and welcoming to talented people regardless of where they come from.

Founded to accelerate the nation's industrial revolution, MIT is profoundly American. With ingenuity and drive, our graduates have invented fundamental technologies, launched new industries, and created millions of American jobs. At the same time, and without the slightest sense of contradiction, MIT is profoundly global. Our community gains tremendous strength as a magnet for talent from around the world. Through teaching, research, and innovation, MIT's exceptional community pursues its mission of service to the nation and the world.

■ Highlighted text is suspected to be most likely generated by AI\*

Export to PDF

### 1.1.3. ZeroGPT.net

HomeChat GPT detectorAI content detectorAPIBlogContact UsEnglish ▾

Free AI Tools - Discover 1000+ Free AI Tools.

 Your content appears to be crafted by GPT technology.

0.00%

is written by a human

100.00%

is generated by an AI/GPT

Bookmark This Tool

Detect new text

\*The highlighted text appears to have been generated by an AI system.



EGO Power+ - Generador eléctrico portátil PST30...

★★★★☆

421

\$599<sup>00</sup>

prime

Comprar ahora

The MIT community is driven by a shared purpose: to make a better world through education, research, and innovation. We are fun and quirky, elite but not elitist, inventive and artistic, obsessed with numbers, and welcoming to talented people regardless of where they come from.

Founded to accelerate the nation's industrial revolution, MIT is profoundly American. With ingenuity and drive, our graduates have invented fundamental technologies, launched new industries, and created millions of American jobs. At the same time, and without the slightest sense of contradiction, MIT is profoundly global. Our community gains tremendous strength as a magnet for talent from around the world. Through teaching, research, and innovation, MIT's exceptional community pursues its mission of service to the nation and the world.

Detect new text

2

### 1.1.4. Brandwell.ai

BrandWell

PRICINGAI DETECTORPLAGIARISM CHECKERABOUT USLEARN

LOG INSTART FREE TRIAL

AI Checker

The real-time AI Detector identifies text created by ChatGPT, Gemini, Claude, and various other language models. The real-time AI Checker, features a proprietary tech stack that works deeper than a generic AI classifier to find robotic sounding content. Focusing exclusively on website pages, blog posts, social media content, and email marketing messages. Paste your content below and start your free scan.

The MIT community is driven by a shared purpose, to make a better world through education, research, and innovation. We are fun and quirky, elite but not elitist, inventive and artistic, obsessed with numbers, and welcoming to talented people regardless of where they come from. Founded to accelerate the nation's industrial revolution, MIT is profoundly American. With ingenuity and drive, our graduates have invented fundamental technologies, launched new industries, and created millions of American jobs. At the same time, and without the slightest sense of contradiction, MIT is profoundly global. Our community gains tremendous strength as a magnet for talent from around the world. Through teaching, research, and innovation, MIT's exceptional community pursues its mission of service to the nation and the world.

820 / 2500 Characters

HUMANIZE ITRE-DETECTCHECK PLAGIARISMRRESET

Examples: [Human][Human & AI][GPT4][ChatGPT][BrandWell]

Is it Human?

Our artificial intelligence detection software tells you if what you have reads like it is written by a human or if it sounds robotic. The AI Detector tries to forecast if your content is written by an LLM, or humanly written. With robotic-sounding content placing you in a position of inauthenticity, the need for a ChatGPT Detector is higher than ever.

Human Probability Results

☹️ READS LIKE AI!

⚠️

Predicted based upon 125 words. [Increase this limit.](#)  
Did you write this yourself? Unfortunately, it reads very machine-like. If you write like a robot, you're going to get graded like a robot. Produce [undetectable AI](#) content by learning how to [optimize AI content](#) and/or add more style to your writing.

### 1.1.5. Winston AI

0%

⚠️ Winston has detected the text as 0% human. It is highly probable that an AI text generation tool was used. [How to interpret our results.](#)

!

⚠️ This feature is available only for advanced and elite plans. Please upgrade your account.

Upgrade now

31

⚠️ This text has a **readability score of 31/100** and has a **U.S. school College level**, which means it is difficult to read. [How to interpret our results.](#)

AI detection

AI prediction map

The AI prediction map will scan your content by smaller portions to indicate which portions sounds more synthetic, however, since it scans smaller portions, it is less accurate than our overall score which scans your entire content for a more precise score. [How to interpret our results.](#)

Likely AI generated

Possibly AI generated

Unlikely AI generated

The MIT community is driven by a shared purpose: to make a better world through education, research, and innovation. We are fun and quirky, elite but not elitist, inventive and artistic, obsessed with numbers, and welcoming to talented people regardless of where they come from.

Founded to accelerate the nation's industrial revolution, MIT is profoundly American. With ingenuity and drive, our graduates have invented fundamental technologies, launched new industries, and created millions of American jobs. At the same time, and without the slightest sense of contradiction, MIT is profoundly global. Our community gains tremendous strength as a magnet for talent from around the world. Through teaching, research, and innovation, MIT's exceptional community pursues its mission of service to the nation and the world.

Report

This feature is available only for paid plans. Please [upgrade your account.](#)

Text statistics

Human score: 0%

Number of words: 125

Number of characters: 821

Number of sentences: 7

Reading time: 1 minutes

### 1.1.6. Crossplag

0%

## 1.2. University of Cambridge [2]

### 1.2.1. Undetectable AI

READABILITY

University

PURPOSE

General Writing

998/15000 CHARS ≈ 154 WORDS

The University of Cambridge is one of the world's oldest universities and leading academic centres, and a self-governed community of scholars. Established in 1209, the University is rich in history.

Cambridge's famous Colleges and University buildings attract visitors from all over the world, while its museums and collections also hold many treasures which give an exciting insight into the scholarly activities of the University's academics and students.

The University's reputation for outstanding academic achievement is known worldwide and reflects the intellectual achievement of its students over more than eight centuries, as well as the world-class original research carried out by the staff of the University and the Colleges. Many of the University's customs and unusual terminology can be traced to roots in the early years of the University's long history, and this section of our website looks to the past to find the origins of much that is distinctive in the University of today.

WAITING FOR YOUR INPUT

MORE READABLE

BALANCED

MORE HUMAN

☒ I AGREE TO THE TERMS OF SERVICE (NO ACADEMIC MISCONDUCT)

CLEAR

CHECK FOR AI

HUMANIZE

⚠ Your content is detected as written by AI ⚠

AI DETECTION LIKELIHOOD

⚠ GPTZERO ⚠ OPENAI ⚠ WRITER ⚠ CROSSPLAG ⚠ COPYLEAKS ⚠ SAPLING ⚠ CONTENTATSCALE ⚠ ZEROGPT

KEY: 100% HUMAN 50% HUMAN 0% HUMAN

### 1.2.2. Zero GPT.com

Your Text is AI/GPT Generated

100% AI GPT\*

The University of Cambridge is one of the world's oldest universities and leading academic centres, and a self-governed community of scholars. Established in 1209, the University is rich in history.

Cambridge's famous Colleges and University buildings attract visitors from all over the world, while its museums and collections also hold many treasures which give an exciting insight into the scholarly activities of the University's academics and students.

The University's reputation for outstanding academic achievement is known worldwide and reflects the intellectual achievement of its students over more than eight centuries, as well as the world-class original research carried out by the staff of the University and the Colleges. Many of the University's customs and unusual terminology can be traced to roots in the early years of the University's long history, and this section of our website looks to the past to find the origins of much that is distinctive in the University of today.

Highlighted text is suspected to be most likely generated by AI\*

 [Export to PDF](#)



### 1.2.3. ZeroGPT.net

0%

### 1.2.4. Brandwell.ai

The screenshot shows the BrandWell AI Checker website. The header includes the BrandWell logo and navigation links: PRICING, AI DETECTOR, PLAGIARISM CHECKER, ABOUT US, LEARN, LOG IN, and START FREE TRIAL. The main heading is "AI Checker" in a large, stylized font. Below it, a paragraph describes the real-time AI Detector's capabilities. The central area features a text input box with a sample paragraph about the University of Cambridge. To the right, a section titled "Is it Human?" explains the detection process. Below this, a "Human Probability Results" box displays a red warning icon and the text "READS LIKE AI!". At the bottom right, a red triangle with an exclamation mark is visible.

### 1.2.5. Winston AI

The screenshot displays the Winston AI detection interface. It features three main result cards: "Human Score" showing 0%, "Plagiarism" showing a red exclamation mark, and "Readability score" showing 14. Each card includes a brief explanation and a link to "How to interpret our results". Below these cards is a section for "AI prediction map" and a "Report" section. The "Report" section includes a table with text statistics.

| Text statistics       |           |
|-----------------------|-----------|
| Human score:          | 0%        |
| Number of words:      | 153       |
| Number of characters: | 998       |
| Number of sentences:  | 5         |
| Reading time:         | 1 minutes |

## 1.2.6. Crossplag

### AI Content Detector (Updated version)

Use our AI Content Detector for free to check if the text is AI-generated - now with higher accuracy!

**Text box**

The University of Cambridge is one of the world's oldest universities and leading academic centres, and a self-governed community of scholars. Established in 1209, the University is rich in history.

Cambridge's famous Colleges and University buildings attract visitors from all over the world, while its museums and collections also hold many treasures which give an exciting insight into the scholarly activities of the University's academics and students.

The University's reputation for outstanding academic achievement is known worldwide and reflects the intellectual achievement of its students over more than eight centuries, as well as the world-class original research carried out by the staff of the University and the Colleges. Many of the University's customs and unusual terminology can be traced to roots in the early years of the University's long history, and this section of our website looks to the past to find the origins of much that is distinctive in the University of today.

152/3000

**Results**

**AI Content Index®**

60%

Human Mix AI

0% 25% 50% 75% 100%

This text is co-written by both a human and an AI

Are you satisfied with the results? [👍](#) [👎](#)

**Disclaimer**

- The AI Content Detector v2.0 is based to check on a deeper level to give more precise results.
- The result might take a bit longer to display as the text is checked more thoroughly.
- The AI Content Detector v2.0 is now able to analyze up to 3,000 words (compared to the 1,000 words of the first version)
- At this point, the AI Content Detector only works for the English language.

## 1.3. Harvard University [3]

### 1.3.1. Undetectable AI

**READABILITY** University **PURPOSE** General Writing 1162/15000 CHARS ≈ 176 WORDS

The mission of Harvard College is to educate the citizens and citizen-leaders for our society. We do this through our commitment to the transformative power of a liberal arts and sciences education.

Beginning in the classroom with exposure to new ideas, new ways of understanding, and new ways of knowing, students embark on a journey of intellectual transformation. Through a diverse living environment, where students live with people who are studying different topics, who come from different walks of life and have evolving identities, intellectual transformation is deepened and conditions for social transformation are created. From this we hope that students will begin to fashion their lives by gaining a sense of what they want to do with their gifts and talents, assessing their values and interests, and learning how they can best serve the world.

Waiting for your input

**MORE READABLE** **BALANCED** **MORE HUMAN**

☒ I AGREE TO THE TERMS OF SERVICE (NO ACADEMIC MISCONDUCT)

**CLEAR** **CHECK FOR AI** **HUMANIZE**

⚠️ Your content is detected as written by AI ⚠️

AI DETECTION LIKELIHOOD

⚠️ GPTZERO ⚠️ OPENAI ⚠️ WRITER ⚠️ CROSSPLAG ✅ COPYLEAKS ⚠️ SAPLING ⚠️ CONTENTATSCALE ⚠️ ZEROGPT

KEY: 100% HUMAN 50% HUMAN 0% HUMAN

### 1.3.2. Zero GPT.com

Your Text is AI/GPT Generated

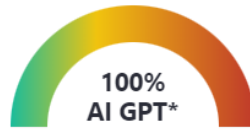

The mission of Harvard College is to educate the citizens and citizen-leaders for our society. We do this through our commitment to the transformative power of a liberal arts and sciences education.

Beginning in the classroom with exposure to new ideas, new ways of understanding, and new ways of knowing, students embark on a journey of intellectual transformation. Through a diverse living environment, where students live with people who are studying different topics, who come from different walks of life and have evolving identities, intellectual transformation is deepened and conditions for social transformation are created. From this we hope that students will begin to fashion their lives by gaining a sense of what they want to do with their gifts and talents, assessing their values and interests, and learning how they can best serve the world.

Harvard College sets the standard for residential liberal arts and sciences education. We have committed to creating and sustaining the conditions that enable all Harvard College students to experience an unparalleled educational journey that is intellectually, socially, and personally transformative.

■ Highlighted text is suspected to be most likely generated by AI\*  
1,162 Characters

 [Export to PDF](#)

### 1.3.3. ZeroGPT.net

 Your content appears to be crafted by GPT technology.



0.00%

is written by a human



100.00%

is generated by an AI/GPT

---

[Bookmark This Tool](#)

[Detect new text](#)

---

 \*The highlighted text appears to have been generated by an AI system.



The mission of Harvard College is to educate the citizens and citizen-leaders for our society. We do this through our commitment to the transformative power of a liberal arts and sciences education.

Beginning in the classroom with exposure to new ideas, new ways of understanding, and new ways of knowing, students embark on a journey of intellectual transformation. Through a diverse living environment, where students live with people who are studying different topics, who come from different walks of life and have evolving identities, intellectual transformation is deepened and conditions for social transformation are created. From this we hope that students will begin to fashion their lives by gaining a sense of what they want to do with their gifts and talents, assessing their values and interests, and learning how they can best serve the world.

### 1.3.4. Brandwell.ai

## AI Checker

The real-time AI Detector identifies text created by ChatGPT, Gemini, Claude, and various other language models. The real-time AI Checker, features a proprietary tech stack that works deeper than a generic AI classifier to find robotic sounding content. Focusing exclusively on website pages, blog posts, social media content, and email marketing messages. Paste your content below and start your free scan.

The mission of Harvard College is to educate the citizens and citizen-leaders for our society. We do this through our commitment to the transformative power of a liberal arts and sciences education.

Beginning in the classroom with exposure to new ideas, new ways of understanding, and new ways of knowing, students embark on a journey of intellectual transformation. Through a diverse living environment, where students live with people who are studying different topics, who come from different walks of life and have evolving identities, intellectual transformation is deepened and conditions for social transformation are created. From this we hope that students will begin to fashion their lives by gaining a sense of what they want to do with their gifts and talents, assessing their values and interests, and learning how they can best serve the world.

858 / 2500 Characters

Is it Human?

Our artificial intelligence detection software tells you if what you have reads like it is written by a human or if it sounds robotic. The AI Detector tries to forecast if your content is written by an LLM, or humanly written. With robotic-sounding content placing you in a position of inauthenticity, the need for a ChatGPT Detector is higher than ever.

### Human Probability Results

😞 HARD TO TELL!

?

Predicted based upon **136 words**. [Increase this limit.](#)

HUMANIZE IT

RE-DETECT

CHECK PLAGIARISM

RESET

### 1.3.5. Winston AI

Text scan Results

#### Human Score

0%

Winston has detected the text as 0% human. It is highly probable that an AI text generation tool was used. [How to interpret our results.](#)

#### Plagiarism

!

This feature is available only for advanced and elite plans. Please upgrade your account.

[Upgrade now](#)

#### Readability score

34

This text has a readability score of 34/100 and has a U.S. school College level, which means it is difficult to read. [How to interpret our results.](#)

#### AI detection

##### AI prediction map

The AI prediction map will scan your content by smaller portions to indicate which portions sounds more synthetic, however, since it scans smaller portions, it is less accurate than our overall score which scans your entire content for a more precise score. [How to interpret our results.](#)

🔴 Likely AI generated 🟡 Possibly AI generated 🟢 Unlikely AI generated

The mission of Harvard College is to educate the citizens and citizen-leaders for our society. We do this through our commitment to the transformative power of a liberal arts and sciences education.

Beginning in the classroom with exposure to new ideas, new ways of understanding, and new ways of knowing, students embark on a journey of intellectual transformation. Through a diverse living environment, where students live with people who are studying different topics, who come from different walks of life and have evolving identities, intellectual transformation is deepened and conditions for social transformation are created. From this we hope that students will begin to fashion their lives by gaining a sense of what they want to do with their gifts and talents, assessing their values and interests, and learning how they can best serve the world.

#### Report

This feature is available only for paid plans. Please [upgrade your account.](#)

##### Text statistics

|                       |           |
|-----------------------|-----------|
| Human score:          | 0%        |
| Number of words:      | 136       |
| Number of characters: | 859       |
| Number of sentences:  | 5         |
| Reading time:         | 1 minutes |

## 1.3.6. Crossplag

AI Content Detector

### AI Content Detector (Updated version)

Use our AI Content Detector for free to check if the text is AI-generated - now with higher accuracy!

**Text box**

The mission of Harvard College is to educate the citizens and citizen-leaders for our society. We do this through our commitment to the transformative power of a liberal arts and sciences education.

Beginning in the classroom with exposure to new ideas, new ways of understanding, and new ways of knowing, students embark on a journey of intellectual transformation. Through a diverse living environment, where students live with people who are studying different topics, who come from different walks of life and have evolving identities, intellectual transformation is deepened and conditions for social transformation are created. From this we hope that students will begin to fashion their lives by gaining a sense of what they want to do with their gifts and talents, assessing their values and interests, and learning how they can best serve the world.

135/3000

**Results**

AI Content Index<sup>®</sup>

0% 25% 50% 75% 100%

Human 40% AI 60%

This text is mainly written by an AI.

Are you satisfied with the results? [👍](#) [👎](#)

**Disclaimer**

- The AI Content Detector v2.0 is based to check on a deeper level to give more precise results
- The result might take a bit longer to display as the text is checked more thoroughly
- The AI Content Detector v2.0 is now able to analyze up to 3,000 words (compared to the 1,000 words of the first version)
- At this point, the AI Content Detector only works for the English language

## 1.4. Imperial College London [4]

### 1.4.1. Undetectable AI

READABILITY University PURPOSE General Writing 818/15000 CHARS ≈ 120 WORDS

Five startups from Imperial's innovation ecosystem have showcased their ideas alongside peers from London's leading universities.

Twenty entrepreneurs from Imperial College London, the London School of Economics (LSE), King's College London, and UCL joined forces at LSE's campus to pitch their startups to investors at this year's London Demo Day.

The annual collaborative event brings together the best and brightest entrepreneurial talent from London's top universities, with each university selecting five startups who are currently in the early growth stage and looking to raise between £100,000 - £2 million.

⋮ WAITING FOR YOUR INPUT MORE READABLE 1 BALANCED 1 MORE HUMAN 1

☒ I AGREE TO THE TERMS OF SERVICE (NO ACADEMIC MISCONDUCT) CLEAR CHECK FOR AI HUMANIZE

⚠️ Your content is detected as written by AI ⚠️

AI DETECTION LIKELIHOOD

⚠️ GPTZERO ⚠️ OPENAI ⚠️ WRITER ⚠️ CROSSPLAG ✅ COPYLEAKS ⚠️ SAPLING ⚠️ CONTENTATSCALE ⚠️ ZEROGPT

KEY: 100% HUMAN 50% HUMAN 0% HUMAN

## 1.4.2. Zero GPT.com

Your Text is AI/GPT Generated

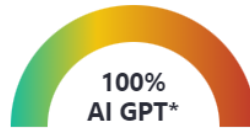

Five startups from Imperial's innovation ecosystem have showcased their ideas alongside peers from London's leading universities.

Twenty entrepreneurs from Imperial College London, the London School of Economics (LSE), King's College London, and UCL joined forces at LSE's campus to pitch their startups to investors at this year's London Demo Day.

The annual collaborative event brings together the best and brightest entrepreneurial talent from London's top universities, with each university selecting five startups who are currently in the early growth stage and looking to raise between £100,000 - £2 million.

Since 2019, the programme has supported more than 65 startups which have collectively raised more than £97 million, according to data from Beauhurst – a database of the UK's fastest-growing companies.

Highlighted text is suspected to be most likely generated by AI\*  
818 Characters

 [Export to PDF](#)

## 1.4.3. ZeroGPT.net

 Your content appears to be crafted by GPT technology.

0.00%

is written by a human

100.00%

is generated by an AI/GPT

[Bookmark This Tool](#)  
[Detect new text](#)

 \*The highlighted text appears to have been generated by an AI system.



Five startups from Imperial's innovation ecosystem have showcased their ideas alongside peers from London's leading universities.

Twenty entrepreneurs from Imperial College London, the London School of Economics (LSE), King's College London, and UCL joined forces at LSE's campus to pitch their startups to investors at this year's London Demo Day.

The annual collaborative event brings together the best and brightest entrepreneurial talent from London's top universities, with each university selecting five startups who are currently in the early growth stage and looking to raise between £100,000 - £2 million.

Since 2019, the programme has supported more than 65 startups which have collectively raised more than £97 million, according to data from Beauhurst – a database of the UK's fastest-growing companies.

[Detect new text](#)

11

## 1.4.4. Brandwell.ai

Five startups from Imperial's innovation ecosystem have showcased their ideas alongside peers from London's leading universities.

Twenty entrepreneurs from Imperial College London, the London School of Economics (LSE), King's College London, and UCL joined forces at LSE's campus to pitch their startups to investors at this year's London Demo Day.

The annual collaborative event brings together the best and brightest entrepreneurial talent from London's top universities, with each university selecting five startups who are currently in the early growth stage and looking to raise between £100,000 - £2 million.

Since 2019, the programme has supported more than 65 startups which have collectively raised more than £97 million, according to data from Beauhurst – a database of the UK's fastest-growing companies.

815 / 2500 Characters

 HUMANIZE IT

 RE-DETECT

CHECK PLAGIARISM

RESET

### Is it Human?

Our artificial intelligence detection software tells you if what you have reads like it is written by a human or if it sounds robotic. The AI Detector tries to forecast if your content is written by an LLM, or humanly written. With robotic-sounding content placing you in a position of inauthenticity, the need for a ChatGPT Detector is higher than ever.

#### Human Probability Results

😞 HARD TO TELL!

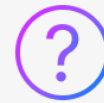

Predicted based upon 120 words. [Increase this limit.](#)

## 1.4.5. Winston AI

100% Human Score

## 1.4.6. Crossplag

### AI Content Detector (Updated version)

Use our AI Content Detector for free to check if the text is AI-generated - now with higher accuracy!

Text box

Five startups from Imperial's innovation ecosystem have showcased their ideas alongside peers from London's leading universities.

Twenty entrepreneurs from Imperial College London, the London School of Economics (LSE), King's College London, and UCL joined forces at LSE's campus to pitch their startups to investors at this year's London Demo Day.

The annual collaborative event brings together the best and brightest entrepreneurial talent from London's top universities, with each university selecting five startups who are currently in the early growth stage and looking to raise between £100,000 - £2 million.

Since 2019, the programme has supported more than 65 startups which have collectively raised more than £97 million, according to data from Beauhurst – a database of the UK's fastest-growing companies.

117/3000

Check

Results

AI Content index<sup>®</sup>

0% 25% 50% 75% 100%

Human Mix AI

This text is mainly written by an AI.

Are you satisfied with the results? 

Disclaimer

- The AI Content Detector v2.0 is based to check on a deeper level to give more precise results
- The result might take a bit longer to display as the text is checked more thoroughly
- The AI Content Detector v2.0 is now able to analyze up to 3,000 words (compared to the 1,000 words of the first version)
- At this point, the AI Content Detector only works for the English language.



## 1.5. University of California, Berkeley [5]

### 1.5.1. Undetectable AI

0% AI-generated

### 1.5.2. Zero GPT.com

Your Text is AI/GPT Generated

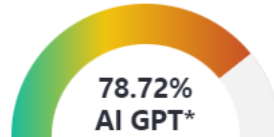

There are four positions of leadership within the Berkeley Division of the Academic Senate: a Division Chair, a Vice Chair, a Secretary, and a Parliamentarian. The Division Chair:

Presides at meetings of the Division and of the Divisional Council.

Sits, upon invitation or at his or her discretion, without vote, in deliberations of any committee of the Division.

Serves, ex officio, as a member of the Assembly of the Academic Senate and of the Academic Council, and as Chair of the Divisional Committee on Assembly Representation.

Refers matters to the officers or agencies of the Division and of the Administration, as appropriate.

Committee chairs are also leaders within the Senate; in addition to providing leadership to their committees, they sit on the Divisional Council (DIVCO), which speaks on behalf of the Berkeley Division.

For the 2023-24 academic year, Senate Leadership includes:

■ Highlighted text is suspected to be most likely generated by AI\*  
898 Characters

 [Export to PDF](#)

### 1.5.3. ZeroGPT.net

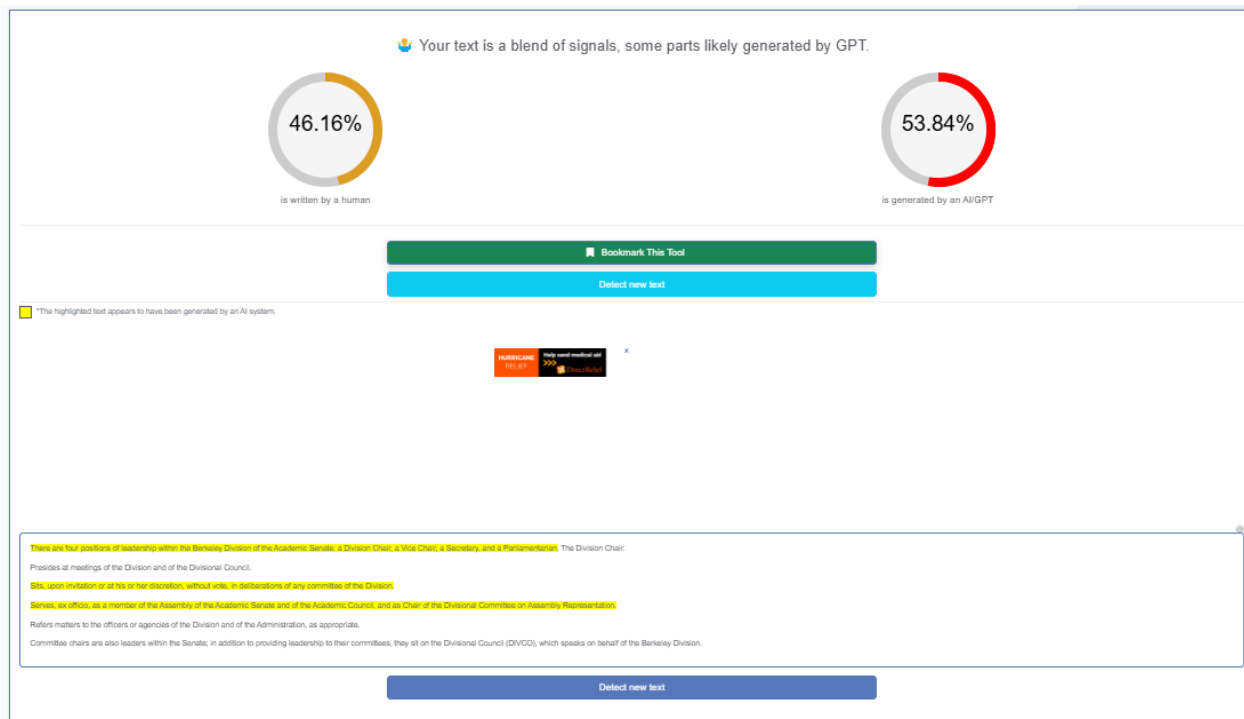

### 1.5.4. Brandwell.ai

0% AI-generated

### 1.5.5. Winston AI

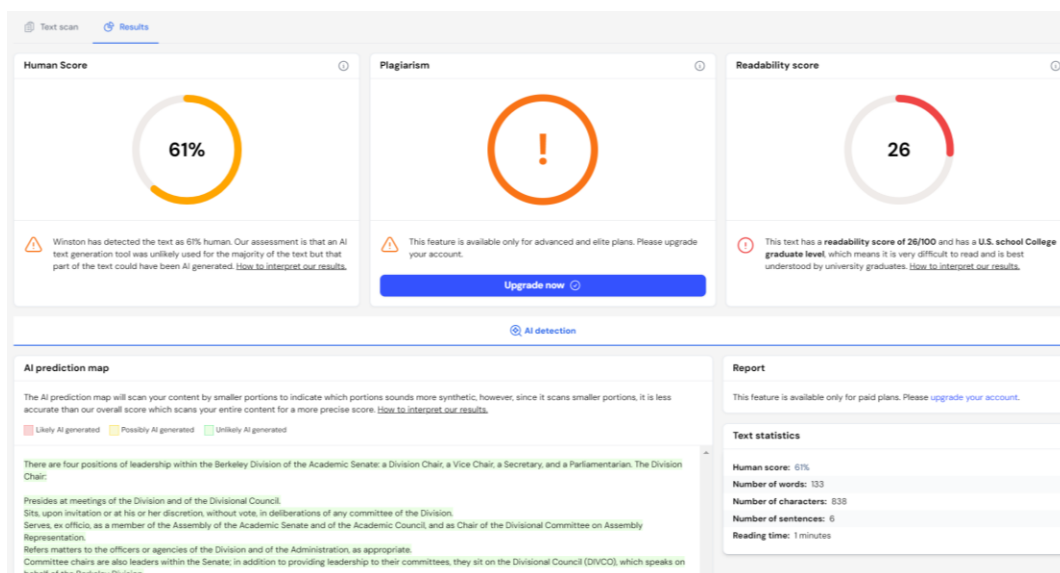

## 1.5.6. Crossplag

AI Content Detector

**AI Content Detector (Updated version)**

Use our AI Content Detector for free to check if the text is AI-generated - now with higher accuracy!

**Text box**

There are four positions of leadership within the Berkeley Division of the Academic Senate: a Division Chair, a Vice Chair, a Secretary, and a Parliamentarian. The Division Chair:

Presides at meetings of the Division and of the Divisional Council.

Sits, upon invitation or at his or her discretion, without vote, in deliberations of any committee of the Division.

Serves, ex officio, as a member of the Assembly of the Academic Senate and of the Academic Council, and as Chair of the Divisional Committee on Assembly Representation.

Refers matters to the officers or agencies of the Division and of the Administration, as appropriate.

Committee chairs are also leaders within the Senate; in addition to providing leadership to their committees, they sit on the Divisional Council (DIVCO), which speaks on behalf of the Berkeley Division.

128/3000

**Check**

**Results**

**AI Content Index<sup>®</sup>**

0% 25% 50% 75% 100%

Human AI

This text is mainly written by an AI.

Are you satisfied with the results? [👍](#) [👎](#)

**Disclaimer**

- The AI Content Detector v2.0 is based to check on a deeper level to give more precise results
- The result might take a bit longer to display as the text is checked more thoroughly
- The AI Content Detector v2.0 is now able to analyze up to 3,000 words (compared to the 1,000 words of the first version)
- At this point, the AI Content Detector only works for the English language.

## 1.6. University of California, Berkeley [6]

### 1.6.1. Undetectable AI

0% AI-generated

### 1.6.2. Zero GPT.com

Your Text is AI/GPT Generated

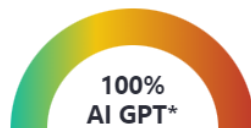

In 1821, two free Black men from the West Indies — playwright William Alexander Brown and actor James Hewlett — opened what's considered the United States' first Black theater in New York City.

At the African Grove Theatre, as it was known, Black performers put on classical pieces, like Shakespeare's Richard III and Othello, as well as ballets, operas, comedies and Brown's original plays. Its audiences were racially integrated, but most often were made up of Black patrons, both free and enslaved. (In 1799, the New York Legislature passed a law to gradually end slavery, but full emancipation didn't happen until 1827.)

When white attendees came to the shows, they were often hostile, harassing the actors and rioting until the performances couldn't go on. When police came to the scene, instead of arresting the white rioters, they arrested the Black performers.

Highlighted text is suspected to be most likely generated by AI\*  
873 Characters

**Export to PDF**

### 1.6.3. ZeroGPT.net

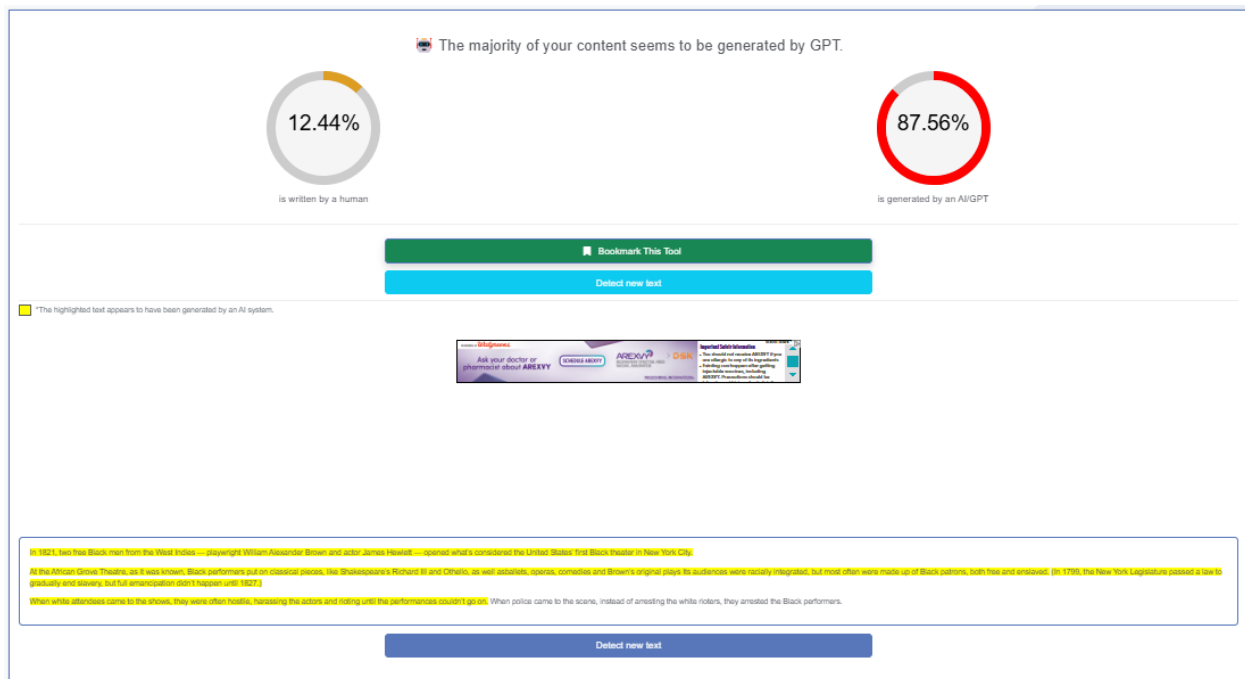

### 1.6.4. Brandwell.ai

0% AI-generated

### 1.6.5. Winston AI

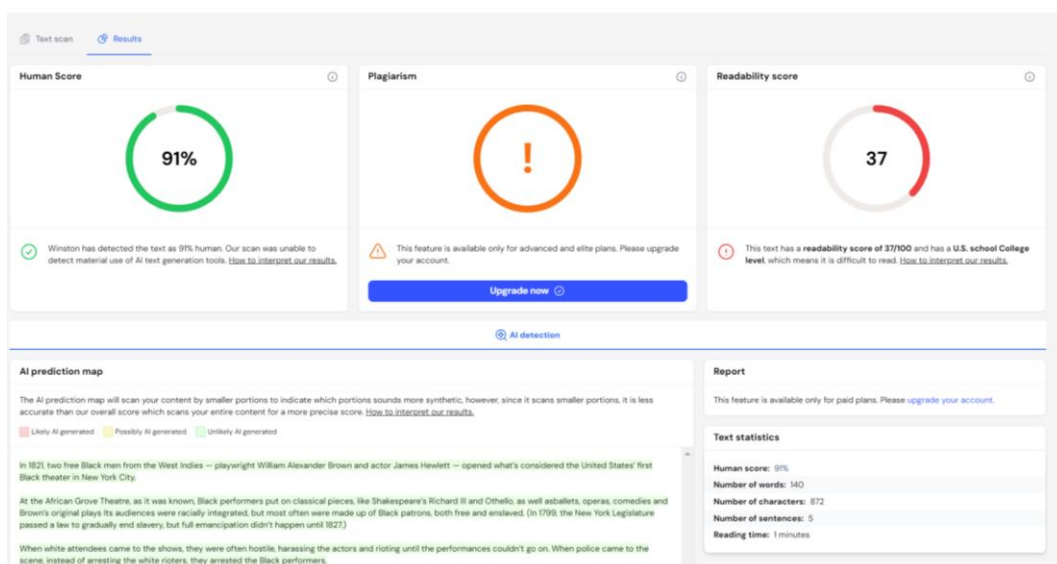

## 1.6.6. Crossplag

AI Content Detector

AI Content Detector (Updated version)

Use our AI Content Detector for free to check if the text is AI-generated - now with higher accuracy!

Text box

In 1821, two free Black men from the West Indies — playwright William Alexander Brown and actor James Hewlett — opened what's considered the United States' first Black theater in New York City.

At the African Grove Theatre, as it was known, Black performers put on classical pieces, like Shakespeare's Richard III and Othello, as well as ballets, operas, comedies and Brown's original plays. Its audiences were racially integrated, but most often were made up of Black patrons, both free and enslaved. (In 1799, the New York Legislature passed a law to gradually end slavery, but full emancipation didn't happen until 1827.)

When white attendees came to the shows, they were often hostile, harassing the actors and rioting until the performances couldn't go on. When police came to the scene, instead of arresting the white rioters, they arrested the Black performers.

140/3000

Check

Results

AI Content Index<sup>®</sup>

Human

Mix

AI

0%25%50%75%100%

This text is mainly written by an AI.

Are you satisfied with the results?  

Disclaimer

- The AI Content Detector v2.0 is based to check on a deeper level to give more precise results
- The result might take a bit longer to display as the text is checked more thoroughly
- The AI Content Detector v2.0 is now able to analyze up to 3,000 words (compared to the 1,000 words of the first version)
- At this point, the AI Content Detector only works for the English language.

## 1.7. Stanford University [7]

### 1.7.1. Undetectable AI

READABILITY 

University

 PURPOSE 

General Writing

 909/15000 CHARS ≈ 144 WORDS

Who we are

What drives our faculty, students, and staff is a spirit of possibility, a legacy inherited from our pioneering founders who created Stanford in the memory of their only child to benefit other people's children. At Stanford, we learn from our past but focus on the future, continually looking for new ways to make the world a better place.

We believe strongly in the role that higher education plays in supporting a thriving society. Colleges and universities not only prepare students for their chosen path, but they help create the next generation of citizen leaders and problem solvers. Higher education institutions pursue a distinct and enduring mission in our society, dedicated solely to the creation and dissemination of knowledge. The breadth and richness of the fabric that comprises the world's institutions of higher learning are integral to long-term human advancement and well-being.

 WAITING FOR YOUR INPUT

MORE READABLE ⓘ

BALANCED ⓘ

MORE HUMAN ⓘ

☒ I AGREE TO THE TERMS OF SERVICE (NO ACADEMIC MISCONDUCT) 

CLEAR

CHECK FOR AI

HUMANIZE

⚠ Your content is detected as written by AI ⚠

AI DETECTION LIKELIHOOD

⚠ GPTZERO ⚠ OPENAI ⚠ WRITER ⚠ CROSSPLAG ⚠ COPYLEAKS ⚠ SAPLING ⚠ CONTENTATSCALE ⚠ ZEROGPT

KEY: 100% HUMAN 50% HUMAN 0% HUMAN

## 1.7.2. Zero GPT.com

Your Text contains mixed signals, with some parts generated by AI/GPT

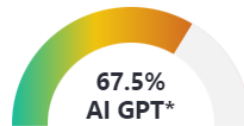

Who we are

What drives our faculty, students, and staff is a spirit of possibility, a legacy inherited from our pioneering founders who created Stanford in the memory of their only child to benefit other people's children. At Stanford, we learn from our past but focus on the future, continually looking for new ways to make the world a better place.

We believe strongly in the role that higher education plays in supporting a thriving society. Colleges and universities not only prepare students for their chosen path, but they help create the next generation of citizen leaders and problem solvers. Higher education institutions pursue a distinct and enduring mission in our society, dedicated solely to the creation and dissemination of knowledge. The breadth and richness of the fabric that comprises the world's institutions of higher learning are integral to long-term human advancement and well-being.

Highlighted text is suspected to be most likely generated by AI\*  
909 Characters

[Export to PDF](#)

## 1.7.3. ZeroGPT.net

It's highly probable that your text is GPT-generated.

[Bookmark This Tool](#)  
[Detect new text](#)

\*The highlighted text appears to have been generated by an AI system.

**Vote Rebecca Arnold for Ada County Highway District 2 Commissioner on November 5!**

Partner to REBEL CORP LLC  
10710 W. Sunset Rd, Suite 100, ID 83404

Who we are

What drives our faculty, students, and staff is a spirit of possibility, a legacy inherited from our pioneering founders who created Stanford in the memory of their only child to benefit other people's children. At Stanford, we learn from our past but focus on the future, continually looking for new ways to make the world a better place.

We believe strongly in the role that higher education plays in supporting a thriving society. Colleges and universities not only prepare students for their chosen path, but they help create the next generation of citizen leaders and problem solvers. Higher education institutions pursue a distinct and enduring mission in our society, dedicated solely to the creation and dissemination of knowledge. The breadth and richness of the fabric that comprises the world's institutions of higher learning are integral to long-term human advancement and well-being.

[Detect new text](#)

## 1.7.4. Brandwell.ai

### AI Checker

The real-time AI Detector identifies text created by ChatGPT, Gemini, Claude, and various other language models. The real-time AI Checker, features a proprietary tech stack that works deeper than a generic AI classifier to find robotic sounding content. Focusing exclusively on website pages, blog posts, social media content, and email marketing messages. Paste your content below and start your free scan.

#### Who we are

What drives our faculty, students, and staff is a spirit of possibility, a legacy inherited from our pioneering founders who created Stanford in the memory of their only child to benefit other people's children. At Stanford, we learn from our past but focus on the future, continually looking for new ways to make the world a better place.

We believe strongly in the role that higher education plays in supporting a thriving society. Colleges and universities not only prepare students for their chosen path, but they help create the next generation of citizen leaders and problem solvers. Higher education institutions pursue a distinct and enduring mission in our society, dedicated solely to the creation and dissemination of knowledge. The breadth and richness of the fabric that comprises the world's institutions of higher learning are integral to long-term human advancement and well-being.

908 / 2500 Characters

#### Is it Human?

Our artificial intelligence detection software tells you if what you have reads like it is written by a human or if it sounds robotic. The AI Detector tries to forecast if your content is written by an LLM, or humanly written. With robotic-sounding content placing you in a position of inauthenticity, the need for a ChatGPT Detector is higher than ever.

#### Human Probability Results

😊 READS LIKE AI!



Predicted based upon 146 words. **Increase this limit.**  
Did you write this yourself? Unfortunately, it reads very machine-like. If you write like a robot, you're going to get flagged like a robot. Reading

**HUMANIZE IT** **RE-DETECT** **CHECK PLAGIARISM** **RESET**

## 1.7.5. Winston AI

#### Text scan

#### Results

##### Human Score

0%

Winston has detected the text as 0% human. It is highly probable that an AI text generation tool was used. [How to interpret our results.](#)

##### Plagiarism

!

This feature is available only for advanced and elite plans. Please upgrade your account.

[Upgrade now](#)

##### Readability score

34

This text has a readability score of 34/100 and has a U.S. school College level, which means it is difficult to read. [How to interpret our results.](#)

#### AI detection

##### AI prediction map

The AI prediction map will scan your content by smaller portions to indicate which portions sounds more synthetic, however, since it scans smaller portions, it is less accurate than our overall score which scans your entire content for a more precise score. [How to interpret our results.](#)

Likely AI generated Possibly AI generated Unlikely AI generated

Who we are  
What drives our faculty, students, and staff is a spirit of possibility, a legacy inherited from our pioneering founders who created Stanford in the memory of their only child to benefit other people's children. At Stanford, we learn from our past but focus on the future, continually looking for new ways to make the world a better place.

We believe strongly in the role that higher education plays in supporting a thriving society. Colleges and universities not only prepare students for their chosen path, but they help create the next generation of citizen leaders and problem solvers. Higher education institutions pursue a distinct and enduring mission in our society, dedicated solely to the creation and dissemination of knowledge. The breadth and richness of the fabric that comprises the world's institutions of higher learning are integral to long-term human advancement and well-being.

##### Report

This feature is available only for paid plans. Please [upgrade your account.](#)

##### Text statistics

Human score: 0%  
Number of words: 146  
Number of characters: 909  
Number of sentences: 6  
Reading time: 1 minutes

## 1.7.6. Crossplag

AI Content Detector

AI Content Detector (Updated version)

Use our AI Content Detector for free to check if the text is AI-generated - now with higher accuracy!

Text box

Who we are

What drives our faculty, students, and staff is a spirit of possibility, a legacy inherited from our pioneering founders who created Stanford in the memory of their only child to benefit other people's children. At Stanford, we learn from our past but focus on the future, continually looking for new ways to make the world a better place.

We believe strongly in the role that higher education plays in supporting a thriving society. Colleges and universities not only prepare students for their chosen path, but they help create the next generation of citizen leaders and problem solvers. Higher education institutions pursue a distinct and enduring mission in our society, dedicated solely to the creation and dissemination of knowledge. The breadth and richness of the fabric that comprises the world's institutions of higher learning are integral to long-term human advancement and well-being.

142/3000

Check

Results

AI Content Index<sup>®</sup>

Human

Mix

AI

0% 25% 50% 75% 100%

This text is mainly written by an AI.

Are you satisfied with the results?

Disclaimer

- The AI Content Detector v2.0 is based to check on a deeper level to give more precise results
- The result might take a bit longer to display as the text is checked more thoroughly
- The AI Content Detector v2.0 is now able to analyze up to 3,000 words (compared to the 1,000 words of the first version)
- At this point, the AI Content Detector only works for the English language.

## 1.8. University of Illinois Urbana Champion [8]

### 1.8.1. Undetectable AI

0% AI-generated

### 1.8.2. Zero GPT.com

Your Text is AI/GPT Generated

95.88%  
AI GPT\*

The University of Illinois is recognized worldwide as one of the great public universities, and ACES has been a part of it from day one. The university timeline stretches back to the mid-1800s. Activist and Illinois-based professor Jonathan Baldwin Turner started a movement to provide higher education for anyone in the nation who aspired to learn. The movement was heavily backed by farmers and industrial workers, who made up over 85 percent of the population of Illinois at the time.

In 1862 President Abraham Lincoln signed the Morrill Land-Grant College Act which donated public lands to create colleges for "the benefit of agriculture and the mechanic arts." Thirty-seven land-grant institutions were established between 1862-1868, including Illinois Industrial University. The Hatch Act of 1887 established the Agricultural Experiment Station, bringing a focus of research to the rich soils of the Urbana-Champaign campus. In 1914, this research was made accessible to citizens through the Smith-Lever Act. This act also established the Cooperative Extension System.

Today, we offer interdisciplinary fields of study to impact lives around the world. To stay up to date on our most recent activities, browse our news section and subscribe to our newsletter.

Highlighted text is suspected to be most likely generated by AI\*

1,267 Characters

Export to PDF

20



### 1.8.3. ZeroGPT.net

🤖 Your content appears to be crafted by GPT technology.

4.42%

is written by a human

95.58%

is generated by an AI/GPT

Bookmark This Tool

Detect new text

\*The highlighted text appears to have been generated by an AI system.

The University of Illinois is recognized worldwide as one of the great public universities, and ACES has been a part of it from day one. The university timeline stretches back to the mid-1800s. Activist and Illinois-based professor Jonathan Baldwin Turner started a movement to provide higher education for anyone in the nation who aspired to learn. The movement was heavily backed by farmers and industrial workers, who made up over 85 percent of the population of Illinois at the time.

In 1862 President Abraham Lincoln signed the Morrill Land-Grant College Act which donated public lands to create colleges for "the benefit of agriculture and the mechanic arts." Thirty-seven land-grant institutions were established between 1862-1868, including Illinois Industrial University.

The Hatch Act of 1887 established the Agricultural Experiment Station, bringing a focus of research to the rich soils of the Urbana-Champaign campus. In 1914, this research was made accessible to citizens through the Smith-Lever Act. This act also established the Cooperative Extension System.

Today, we offer interdisciplinary fields of study to impact lives around the world. To stay up to date on our most recent activities, browse our news section and subscribe to our newsletter.

Detect new text

### 1.8.4. Brandwell.ai

The University of Illinois is recognized worldwide as one of the great public universities, and ACES has been a part of it from day one. The university timeline stretches back to the mid-1800s. Activist and Illinois-based professor Jonathan Baldwin Turner started a movement to provide higher education for anyone in the nation who aspired to learn. The movement was heavily backed by farmers and industrial workers, who made up over 85 percent of the population of Illinois at the time.

In 1862 President Abraham Lincoln signed the Morrill Land-Grant College Act which donated public lands to create colleges for "the benefit of agriculture and the mechanic arts." Thirty-seven land-grant institutions were established between 1862-1868, including Illinois Industrial University.

The Hatch Act of 1887 established the Agricultural Experiment Station, bringing a focus of research to the rich soils of the Urbana-Champaign campus. In 1914, this research was made accessible to citizens through the Smith-Lever Act. This act also established the Cooperative Extension System.

Today, we offer interdisciplinary fields of study to impact lives around the world. To stay up to date on our most recent activities, browse our news section and subscribe to our newsletter.

1265 / 2500 Characters

Is it Human?

Our artificial intelligence detection software tells you if what you have reads like it is written by a human or if it sounds robotic. The AI Detector tries to forecast if your content is written by an LLM, or humanly written. With robotic-sounding content placing you in a position of inauthenticity, the need for a ChatGPT Detector is higher than ever.

Human Probability Results

😬 HARD TO TELL!

?

Predicted based upon 191 words. [Increase this limit.](#)

HUMANIZE IT

RE-DETECT

CHECK PLAGIARISM

RESET

## 1.8.5. Winston AI

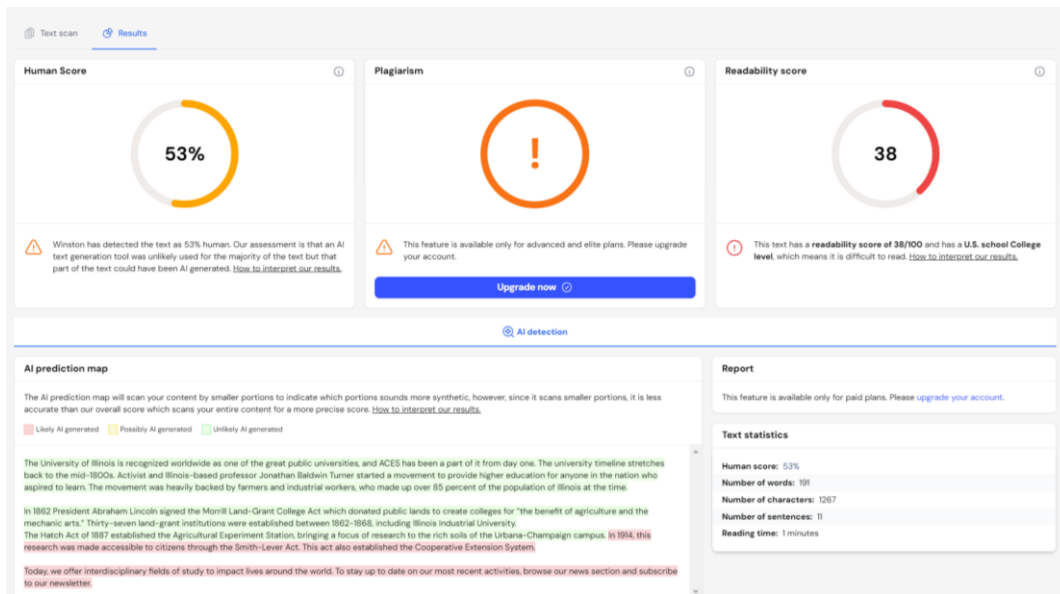

## 1.8.6. Crossplag

0% AI-generated

## 1.9. University of Illinois Urbana Champion [9]

### 1.9.1. Undetectable AI

**READABILITY** University **PURPOSE** General Writing 821/15000 CHARS = 121 WORDS

Diversity, Equity, & Inclusion  
We fulfill our mission by exploring ideas holistically. Diverse perspectives are vital to solving critical challenges, and we welcome all who are up to this great task. We support each of our students, faculty, and staff regardless of race, gender, ability, orientation, or identity.

Our college and department diversity, equity, and inclusion committees work to include diverse perspectives in our hiring, retention, promotion, and teaching practices. The college committee also serves as liaison to Inclusive Illinois. For more information about diversity at the University of Illinois, visit the Illinois Office of Access & Equity website.

**WAITING FOR YOUR INPUT** MORE READABLE 1 BALANCED 1 MORE HUMAN 1

☒ I AGREE TO THE TERMS OF SERVICE (NO ACADEMIC MISCONDUCT) CLEAR CHECK FOR AI HUMANIZE

⚠️ Your content is detected as written by AI ⚠️

AI DETECTION LIKELIHOOD

⚠️ GPTZERO ⚠️ OPENAI ⚠️ WRITER ⚠️ CROSSPLAG ⚠️ COPYLEAKS ⚠️ SAPLING ⚠️ CONTENTATSCALE ⚠️ ZEROGPT

KEY: 100% HUMAN 50% HUMAN 0% HUMAN

## 1.9.2. Zero GPT.com

0% AI-generated

## 1.9.3. ZeroGPT.net

🤖 It's highly probable that your text is GPT-generated.

29.96%

is written by a human

70.04%

is generated by an AI/GPT

Bookmark This Tool

Detect new text

☐ \*The highlighted text appears to have been generated by an AI system.

**Diversity**

Diversity refers to differences within a group. There are the multiple identities around which people can differ, such as race, ethnicity, age, sexual orientation, gender identity and expression, ability or disability status, national origin, socio-economic standing, religion, indigeneity, family structure, and many more. Diversity can be expressed in different experiences, perspectives, worldviews, modes of communication, behaviors, and belief systems or values as related to these intersecting social identities.

ACES is committed to supporting diversity in the college. Diverse perspectives generate novel insights and advance knowledge growth. **Ensuring diversity means focusing on the strengths and wisdom that people of different identities bring, while also acknowledging that these individuals do not live in the world the same way great work.**

**Equity**

**Equity is the practice of ensuring that personal identities or social circumstances are not obstacles to achieving one's potential. Equity refers to fair treatment, access, opportunity, and advancement for all students, faculty, and staff. Ensuring equity requires a commitment to identifying and eliminating barriers - both historic and current - that have prevented the full participation of some. Equitable policies and practices are intended to address and correct such imbalances to ensure that everyone, within their social identities, receives what they need to be successful.**

**Inclusion**

**Inclusion is the active, intentional, and ongoing engagement with diverse groups of people. An inclusive community embraces diversity to strengthen the organization and can contribute to an individual's sense of belonging in that community. An inclusive college environment is one where diverse individuals feel represented in decision-making, valued, and supported for their unique contributions, and supported to participate fully to achieve their potential.**

Detect new text

## 1.9.4. Brandwell.ai

### Commitment to Diversity

Diversity and Inclusion Are Central to Our Commitment to Excellence

In the Department of Communication, we strive to build and nurture inclusiveness, equity, and diversity as an integral part of our departmental culture and not simply as an initiative. We recognize and seek to combat the structures of discrimination, marginalization, and exclusion that continue to exist within our society and in our educational institutions. We are committed to building a community that is equitable, inclusive, and diverse, one in which all students, faculty, staff, and others feel valued and supported. We subscribe to the vision of [Inclusive Illinois](#): "to support a diversity of worldviews, histories, and cultural knowledge across a range of social groups including race, ethnicity, gender identity, sexual orientation, abilities, economic class, religion, and their intersections."

As a department, we know through experience and extensive scholarly research conducted by our own faculty that different ideas, perspectives, and backgrounds create a more productive work environment that delivers better outcomes. Our scholarly work also reveals that all people have biases in how we view others, and there is a tendency to view people we see as outgroup members less favorably than we do those we see as members of our own group. We also know that systemic racism means that the negative consequences of these biases have long-lasting effects upon certain groups more than others. Thus, we remain committed as a department to working toward reducing such biases and combating systemic forms of inequity and exclusion. We

HUMANIZE IT

RE-DETECT

CHECK PLAGIARISM

RESET

### Is it Human?

Our artificial intelligence detection software tells you if what you have reads like it is written by a human or if it sounds robotic. The AI Detector tries to forecast if your content is written by an LLM, or humanly written. With robotic-sounding content placing you in a position of inauthenticity, the need for a ChatGPT Detector is higher than ever.

### Human Probability Results

😞 HARD TO TELL!

?

Predicted based upon 295 words. [Increase this limit.](#)

## 1.9.5. Winston AI

The screenshot shows the Winston AI interface. At the top, there are three circular progress indicators: the first shows 1%, the second shows an exclamation mark, and the third shows 6. Below these are three warning icons with text: 'Winston has detected the text as 1% human. It is highly probable that an AI text generation tool was used. [How to interpret our results.](#)', 'This feature is available only for advanced and elite plans. Please upgrade your account.', and 'This text has a readability score of 6/100 and has a U.S. school Professional level, which means it is extremely difficult to read and understood by university graduates. [How to interpret our results.](#)'. A blue 'Upgrade now' button is present. Below this is a section titled 'AI detection' with a sub-section 'AI prediction map' explaining the scanning process and a legend for 'Likely AI generated', 'Possibly AI generated', and 'Unlikely AI generated'. The main text area contains several paragraphs about diversity, equity, and inclusion, with some parts highlighted in red. On the right, a 'Report' section states 'This feature is available only for paid plans. Please upgrade your account.' and a 'Text statistics' box shows: 'Human score: 1%', 'Number of words: 323', 'Number of characters: 2250', 'Number of sentences: 14', and 'Reading time: 2 minutes'.

## 1.9.6. Crossplag

0% AI-generated

## 1.10. University of British Columbia [10]

### 1.10.1. Undetectable AI

The screenshot shows the Undetectable AI interface. At the top, there are two dropdown menus: 'READABILITY' set to 'University' and 'PURPOSE' set to 'General Writing'. To the right, it says '1251/15000 CHARS ≈ 185 WORDS'. The main text area contains two paragraphs: 'The interdisciplinary Bachelor + Master of Management Dual Degree is an accelerated program in which you earn both a UBC Bachelor and a Master of Management degree in as little as 4.5 years. You can advance your knowledge and skills to help you navigate complex environments, and contribute to the future development of organizations, sectors, communities, and regions in the face of questions regarding climate justice, reconciliation, and social and economic inequality. Courses and workshops are founded on principles of decolonization and inclusion, and engage in topics like equity, diversity, enculturation, emotional intelligence, and Indigenous perspectives.' and 'Experiential Learning and Research You will be part of an interdisciplinary cohort of students from diverse undergraduate programs and backgrounds, and...'. Below the text area are three buttons: 'WAITING FOR YOUR INPUT', 'MORE READABLE', 'BALANCED', and 'MORE HUMAN'. At the bottom, there is a checkbox for 'I AGREE TO THE TERMS OF SERVICE (NO ACADEMIC MISCONDUCT)' and three buttons: 'CLEAR', 'CHECK FOR AI', and 'HUMANIZE'.

⚠️ Your content is detected as written by AI ⚠️

AI DETECTION LIKELIHOOD

⚠️ GPTZERO ⚠️ OPENAI ⚠️ WRITER ⚠️ CROSSPLAG ⚠️ COPYLEAKS ⚠️ SAPLING ⚠️ CONTENTATSCALE ⚠️ ZEROGPT

KEY: 100% HUMAN 50% HUMAN 0% HUMAN

## 1.10.2. Zero GPT.com

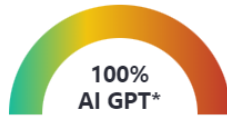

The interdisciplinary Bachelor + Master of Management Dual Degree is an accelerated program in which you earn both a UBC Bachelor and a Master of Management degree in as little as 4.5 years. You can advance your knowledge and skills to help you navigate complex environments, and contribute to the future development of organizations, sectors, communities, and regions in the face of questions regarding climate justice, reconciliation, and social and economic inequality. Courses and workshops are founded on principles of decolonization and inclusion, and engage in topics like equity, diversity, enculturation, emotional intelligence, and Indigenous perspectives.

### Experiential Learning and Research

You will be part of an interdisciplinary cohort of students from diverse undergraduate programs and backgrounds, and take part in experiential learning that includes projects that engage the broader community. As part of your studies, you will do an applied project, where you will investigate an issue or problem in a real-world context, supported by feedback and guidance from your academic advisor. You will also have access to topical presentations over the course of your undergraduate studies, and take part in two intensive summer workshops.

■ Highlighted text is suspected to be most likely generated by AI\*

1/31/2024

 [Export to PDF](#)

## 1.10.3. ZeroGPT.net

 Your content appears to be crafted by GPT technology.

0.00%

is written by a human

100.00%

is generated by an AI/GPT

Bookmark This Tool

Detect new text

■ \*The highlighted text appears to have been generated by an AI system.



**Dermatologist: Reduce Skin Tags at Home With 1 Simple Trick**

The interdisciplinary Bachelor + Master of Management Dual Degree is an accelerated program in which you earn both a UBC Bachelor and a Master of Management degree in as little as 4.5 years. You can advance your knowledge and skills to help you navigate complex environments, and contribute to the future development of organizations, sectors, communities, and regions in the face of questions regarding climate justice, reconciliation, and social and economic inequality. Courses and workshops are founded on principles of decolonization and inclusion, and engage in topics like equity, diversity, enculturation, emotional intelligence, and Indigenous perspectives.

**Experiential Learning and Research**

You will be part of an interdisciplinary cohort of students from diverse undergraduate programs and backgrounds, and take part in experiential learning that includes projects that engage the broader community. As part of your studies, you will do an applied project, where you will investigate an issue or problem in a real-world context, supported by feedback and guidance from your academic advisor. You will also have access to topical presentations over the course of your undergraduate studies, and take part in two intensive summer workshops.

Detect new text

## 1.10.4. Brandwell.ai

### AI Checker

The real-time AI Detector identifies text created by ChatGPT, Gemini, Claude, and various other language models. The real-time AI Checker, features a proprietary tech stack that works deeper than a generic AI classifier to find robotic sounding content. Focusing exclusively on website pages, blog posts, social media content, and email marketing messages. Paste your content below and start your free scan.

The interdisciplinary Bachelor + Master of Management Dual Degree is an accelerated program in which you earn both a UBC Bachelor and a Master of Management degree in as little as 4.5 years. You can advance your knowledge and skills to help you navigate complex environments, and contribute to the future development of organizations, sectors, communities, and regions in the face of questions regarding climate justice, reconciliation, and social and economic inequality. Courses and workshops are founded on principles of decolonization and inclusion, and engage in topics like equity, diversity, enculturation, emotional intelligence, and Indigenous perspectives.

### Experiential Learning and Research

You will be part of an interdisciplinary cohort of students from diverse undergraduate programs and backgrounds, and take part in experiential learning that includes projects that engage the broader community. As part of your studies, you will do an applied project, where you will investigate an issue or problem in a real-world context, supported by feedback and guidance from your academic advisor. You will also have access to topical presentations over the course of your undergraduate studies, and take part in two intensive summer workshops.

1250 / 2500 Characters

[HUMANIZE IT](#) [RE-DETECT](#) [CHECK PLAGIARISM](#) [RESET](#)

#### Is it Human?

Our artificial intelligence detection software tells you if what you have reads like it is written by a human or if it sounds robotic. The AI Detector tries to forecast if your content is written by an LLM, or humanly written. With robotic-sounding content placing you in a position of inauthenticity, the need for a ChatGPT Detector is higher than ever.

#### Human Probability Results

😞 READS LIKE AI!



Predicted based upon **183 words**. [Increase this limit.](#)  
Did you write this yourself? Unfortunately, it reads very machine-like. If you write like a robot, you're going to get graded like a robot. Produce

## 1.10.5. Winston AI

Text scan Results

#### Human Score

0%

⚠️ Winston has detected the text as 0% human. It is highly probable that an AI text generation tool was used. [How to interpret our results.](#)

#### Plagiarism

!

⚠️ This feature is available only for advanced and elite plans. Please upgrade your account.

[Upgrade now](#)

#### Readability score

5

⚠️ This text has a **readability score of 5/100** and has a **U.S. school Professional level**, which means it is extremely difficult to read and is best understood by university graduates. [How to interpret our results.](#)

#### AI prediction map

The AI prediction map will scan your content by smaller portions to indicate which portions sounds more synthetic; however, since it scans smaller portions, it is less accurate than our overall score which scans your entire content for a more precise score. [How to interpret our results.](#)

🔴 Likely AI generated 🟡 Possibly AI generated 🟢 Unlikely AI generated

The interdisciplinary Bachelor + Master of Management Dual Degree is an accelerated program in which you earn both a UBC Bachelor and a Master of Management degree in as little as 4.5 years. You can advance your knowledge and skills to help you navigate complex environments, and contribute to the future development of organizations, sectors, communities, and regions in the face of questions regarding climate justice, reconciliation, and social and economic inequality. Courses and workshops are founded on principles of decolonization and inclusion, and engage in topics like equity, diversity, enculturation, emotional intelligence, and Indigenous perspectives.

Experiential Learning and Research

You will be part of an interdisciplinary cohort of students from diverse undergraduate programs and backgrounds, and take part in experiential learning that includes projects that engage the broader community. As part of your studies, you will do an applied project, where you will investigate an issue or problem in a real-world context, supported by feedback and guidance from your academic advisor. You will also have access to topical presentations over the course of your undergraduate studies, and take part in two intensive summer workshops.

#### Report

This feature is available only for paid plans. Please [upgrade your account.](#)

#### Text statistics

|                       |           |
|-----------------------|-----------|
| Human score:          | 0%        |
| Number of words:      | 183       |
| Number of characters: | 1251      |
| Number of sentences:  | 6         |
| Reading time:         | 1 minutes |

## 1.10.6. Crossplag

AI Content Detector

### AI Content Detector (Updated version)

Use our AI Content Detector for free to check if the text is AI-generated - now with higher accuracy!

**Text box**

The interdisciplinary Bachelor + Master of Management Dual Degree is an accelerated program in which you earn both a UBC Bachelor and a Master of Management degree in as little as 4.5 years. You can advance your knowledge and skills to help you navigate complex environments, and contribute to the future development of organizations, sectors, communities, and regions in the face of questions regarding climate justice, reconciliation, and social and economic inequality. Courses and workshops are founded on principles of decolonization and inclusion, and engage in topics like equity, diversity, enculturation, emotional intelligence, and Indigenous perspectives.

Experiential Learning and Research

You will be part of an interdisciplinary cohort of students from diverse undergraduate programs and backgrounds, and take part in experiential learning that includes projects that engage the broader community. As part of your studies, you will do an applied project, where you will investigate an issue or problem in a real-world context, supported by feedback and guidance from your academic advisor. You will also have access to topical presentations over the course of your undergraduate studies, and take part in two intensive summer workshops.

183/3000

**Check**

**Results**

AI Content Index®

66%

Human 66% AI 34%

0% 25% 50% 75% 100%

This text is co-written by both a human and an AI

Are you satisfied with the results? 🗳️

**Disclaimer**

- The AI Content Detector v2.0 is based to check on a deeper level to give more precise results
- The result might take a bit longer to display as the text is checked more thoroughly
- The AI Content Detector v2.0 is now able to analyze up to 3,000 words (compared to the 1,000 words of the first version)
- At this point, the AI Content Detector only works for the English language.

## 1.11. Idaho State University [11]

### 1.11.1. Undetectable AI

0% AI-generated

### 1.11.2. Zero GPT.com

**Your Text is AI/GPT Generated**



100% AI GPT\*

Idaho State University has served the citizens of the state since 1901, when the institution was first established as the Academy of Idaho. Renamed the Idaho Technical Institute in 1915 and reorganized as the Southern Branch of the University of Idaho in 1927, it was established as Idaho State College in 1947. By action of the 37th Idaho Legislature, the institution became Idaho State University on July 1, 1963. The University's Strategic Plan is online at <https://isu.edu/strategicplan/>.

Certificate programs of varying lengths, an Associate of Applied Science degree, and a Bachelor of Applied Science degree are included in the curricula of the College of Technology. Bachelor's and master's degrees in a variety of fields are awarded by the College of Arts and Letters, College of Business, College of Education, College of Science and Engineering, Kasiska Division of Health Sciences, and the Graduate School. Terminal and professional degrees offered at Idaho State University include Master of Fine Arts, Doctor of Philosophy, Doctor of Arts, Doctor of Education, Doctor of Nursing Practice, Doctor of Audiology, Doctor of Physical Therapy, and Doctor of Pharmacy.

Highlighted text is suspected to be most likely generated by AI\*  
1,178 Characters

 **Export to PDF**

### 1.11.3. ZeroGPT.net

🤖 Your content appears to be crafted by GPT technology.

0.00%

is written by a human

100.00%

is generated by an AI/GPT

Bookmark This Tool

Detect new text

🟡 The highlighted text appears to have been generated by an AI system.

okta

Least-privilege access, simplified.

Get started

Idaho State University has served the citizens of the state since 1901, when the institution was first established as the Academy of Idaho. Renamed the Idaho Technical Institute in 1915 and reorganized as the Southern Branch of the University of Idaho in 1927, it was established as Idaho State College in 1947. By action of the 37th Idaho Legislature, the institution became Idaho State University on July 1, 1963. The University's Strategic Plan is online at <https://isu.edu/strategicplan/>.  
Certificate programs of varying lengths, an Associate of Applied Science degree, and a Bachelor of Applied Science degree are included in the curricula of the College of Technology. Bachelor's and master's degrees in a variety of fields are awarded by the College of Arts and Letters, College of Business, College of Education, College of Science and Engineering, Keesika Division of Health Sciences, and the Graduate School. Terminal and professional degrees offered at Idaho State University include Master of Fine Arts, Doctor of Philosophy, Doctor of Arts, Doctor of Education, Doctor of Nursing Practice, Doctor of Audiology, Doctor of Physical Therapy, and Doctor of Pharmacy.

Detect new text

### 1.11.4. Brandwell.ai

0% AI-generated

### 1.11.5. Winston AI

Text scan Results

Human Score

96%

Winston has detected the text as 96% human. Our scan was unable to detect material use of AI text generation tools. [How to interpret our results.](#)

Plagiarism

!

This feature is available only for advanced and elite plans. Please upgrade your account. [Upgrade now](#)

Readability score

21

This text has a readability score of 21/100 and has a U.S. school College graduate level, which means it is very difficult to read and is best understood by university graduates. [How to interpret our results.](#)

AI detection

AI prediction map

The AI prediction map will scan your content by smaller portions to indicate which portions sounds more synthetic, however, since it scans smaller portions, it is less accurate than our overall score which scans your entire content for a more precise score. [How to interpret our results.](#)  

Likely AI generated

Possibly AI generated

Unlikely AI generated

Idaho State University has served the citizens of the state since 1901, when the institution was first established as the Academy of Idaho. Renamed the Idaho Technical Institute in 1915 and reorganized as the Southern Branch of the University of Idaho in 1927, it was established as Idaho State College in 1947. By action of the 37th Idaho Legislature, the institution became Idaho State University on July 1, 1963. The University's Strategic Plan is online at <https://isu.edu/strategicplan/>.  
Certificate programs of varying lengths, an Associate of Applied Science degree, and a Bachelor of Applied Science degree are included in the curricula of the College of Technology. Bachelor's and master's degrees in a variety of fields are awarded by the College of Arts and Letters, College of Business, College of Education, College of Science and Engineering, Keesika Division of Health Sciences, and the Graduate School. Terminal and professional degrees offered at Idaho State University include Master of Fine Arts, Doctor of Philosophy, Doctor of Arts, Doctor of Education, Doctor of Nursing Practice, Doctor of Audiology, Doctor of Physical Therapy, and Doctor of Pharmacy.

Report

This feature is available only for paid plans. Please [upgrade your account.](#)

Text statistics

Human score: 96%

Number of words: 179

Number of characters: 1178

Number of sentences: 7

Reading time: 1 minutes

28



## 1.11.6. Crossplag

AI Content Detector

### AI Content Detector (Updated version)

Use our AI Content Detector for free to check if the text is AI-generated - now with higher accuracy!

**Text box**

Idaho State University has served the citizens of the state since 1901, when the institution was first established as the Academy of Idaho. Renamed the Idaho Technical Institute in 1915 and reorganized as the Southern Branch of the University of Idaho in 1927, it was established as Idaho State College in 1947. By action of the 37th Idaho Legislature, the institution became Idaho State University on July 1, 1963. The University's Strategic Plan is online at <https://isu.edu/strategicplan/>.

Certificate programs of varying lengths, an Associate of Applied Science degree, and a Bachelor of Applied Science degree are included in the curricula of the College of Technology. Bachelor's and master's degrees in a variety of fields are awarded by the College of Arts and Letters, College of Business, College of Education, College of Science and Engineering, Kasiska Division of Health Sciences, and the Graduate School. Terminal and professional degrees offered at Idaho State University include Master of Fine Arts, Doctor of Philosophy, Doctor of Arts, Doctor of Education, Doctor of Nursing Practice, Doctor of Audiology, Doctor of Physical Therapy, and Doctor of Pharmacy.

180/3000

**Check**

**Results**

AI Content Index®

85%

Human 10% AI

0% 25% 50% 75% 100%

This text is mainly written by an AI.

Are you satisfied with the results? [👍](#) [👎](#)

**Disclaimer**

- The AI Content Detector v2.0 is based to check on a deeper level to give more precise results
- The result might take a bit longer to display as the text is checked more thoroughly
- The AI Content Detector v2.0 is now able to analyze up to 3,000 words (compared to the 1,000 words of the first version)
- At this point, the AI Content Detector only works for the English language.

## 2. Published Papers

### 2.1. Srianand et al. [12]

#### 2.1.1. Undetectable AI

0% AI-generated

## 2.1.2. Zero GPT.com

Most of Your Text is AI/GPT Generated

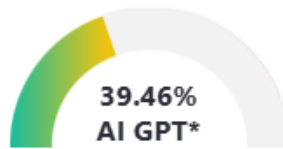

The existence of the cosmic microwave background radiation is a fundamental prediction of hot Big Bang cosmology, and its temperature should increase with increasing redshift. At the present time (redshift  $z = 0$ ), the temperature has been determined with high precision to be  $TCMBR(0) = 2.726 \pm 0.010$  K. In principle, the background temperature can be determined using measurements of the relative populations of atomic fine-structure levels, which are excited by the background radiation. But all previous measurements have achieved only upper limits, thus still formally permitting the radiation temperature to be constant with increasing redshift. Here we report the detection of absorption lines from the first and second fine-structure levels of neutral carbon atoms in an isolated cloud of gas at  $z = 2.3371$ . We also detected absorption due to several rotational transitions of molecular hydrogen, and fine-structure lines of singly ionized carbon. These constraints enable us to determine that the background radiation was indeed warmer in the past: we find that  $TCMBR(z = 2.3371)$  is between 6.0 and 14 K. This is in accord with the temperature of 9.1 K predicted by hot Big Bang cosmology.

Make your text human

So it becomes undetectable

Highlighted text is suspected to be most likely generated by AI\*

 [Export to PDF](#)

## 2.1.3. ZeroGPT.net

0% AI-generated

## 2.1.4. Brandwell.ai

0% AI-generated

## 2.1.5. Winston AI

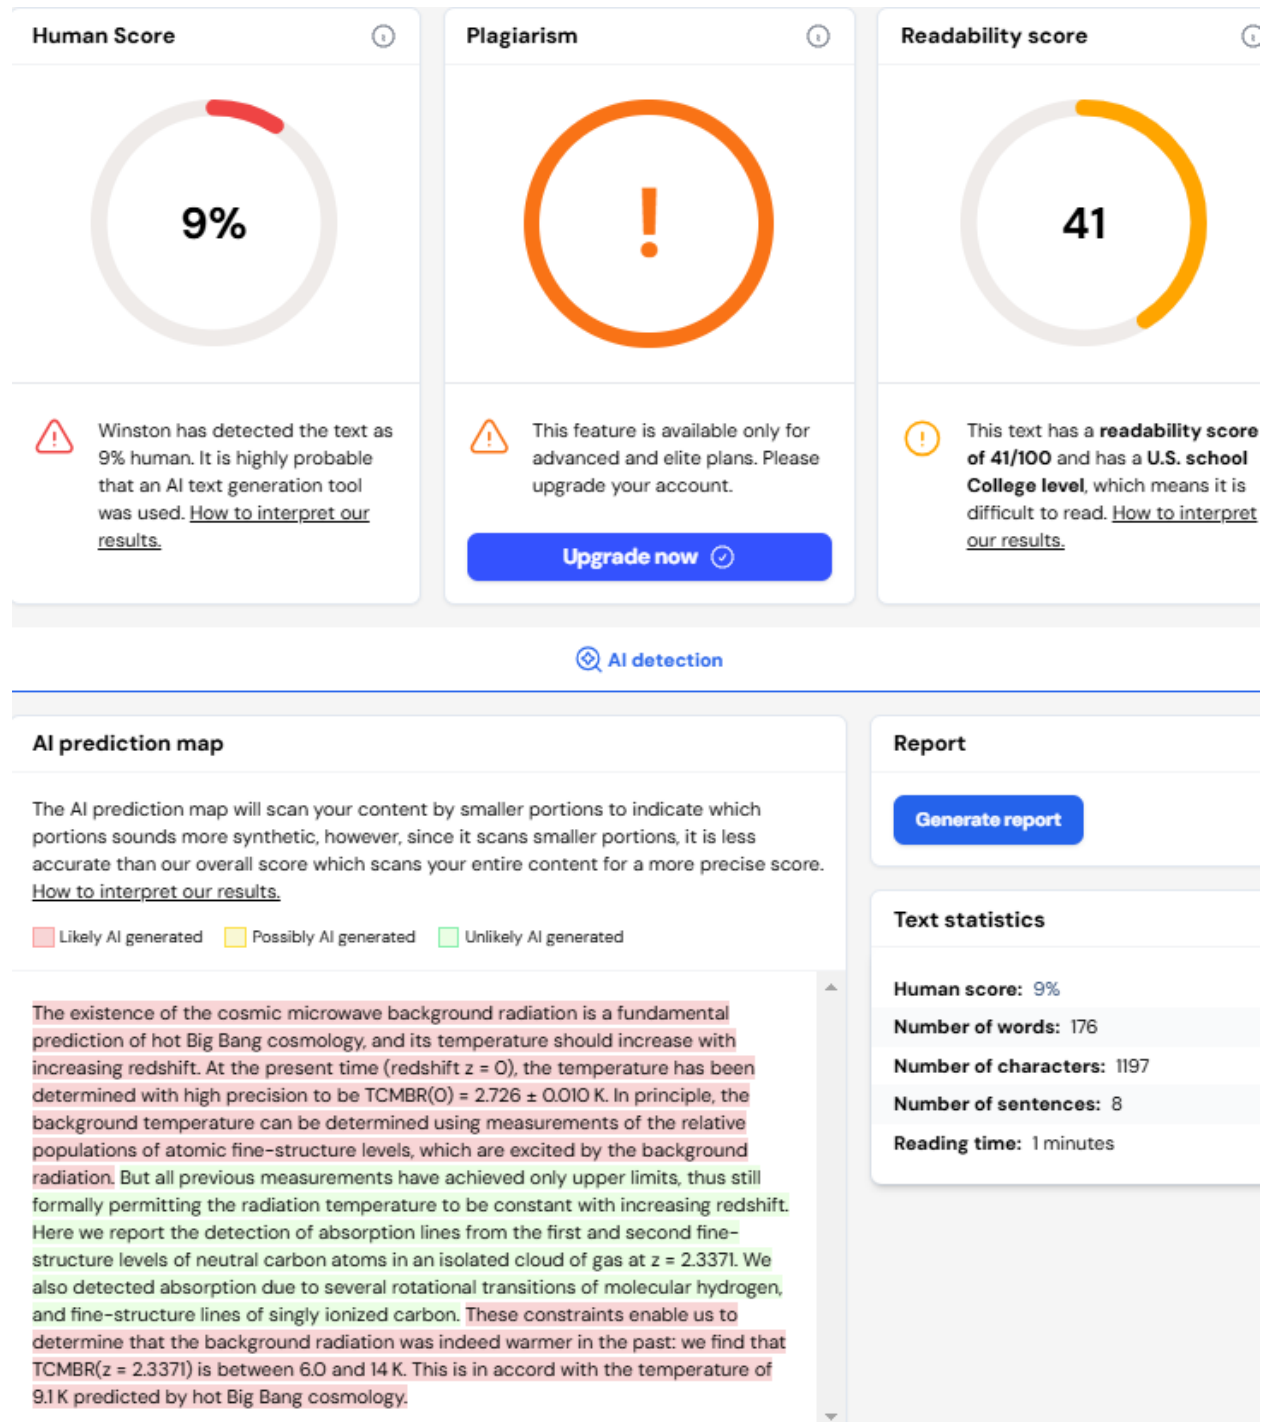

## 2.1.6. Crossplag

0% AI-generated

## 2.2. Chen et al. [13]

### 2.2.1. Undetectable AI

[ud] UNDETECTABLE AI EN AI Detector and Humanizer Business Solutions Documents Pricing SALE API Earn

READABILITY University

PURPOSE General Writing

836/15000 CHARS ≈ 110 WORDS

Stargazer, an ataxic and epileptic mutant mouse, lacks functional AMPA ( $\alpha$ -amino-3-hydroxyl-5-methyl-4-isoxazolepropionate) receptors on cerebellar granule cells. Stargazin, the mutated protein, interacts with both AMPA receptor subunits and synaptic PDZ proteins, such as PSD-95. The interaction of stargazin with AMPA receptor subunits is essential for delivering functional receptors to the surface membrane of granule cells, whereas its binding with PSD-95 and related PDZ proteins through a carboxy-terminal PDZ-binding domain is required for targeting the AMPA receptor to synapses. Expression of a mutant stargazin lacking the PDZ-binding domain in hippocampal pyramidal cells disrupts synaptic AMPA receptors, indicating that stargazin-like mechanisms for targeting AMPA receptors may be widespread in the central nervous system.

⋮ WAITING FOR YOUR INPUT

MORE READABLE ⓘ

BALANCED ⓘ

MORE HUMAN ⓘ

☒ I AGREE TO THE TERMS OF SERVICE (NO ACADEMIC MISCONDUCT) CLEAR CHECK FOR AI HUMANIZE

⚠ Your content is detected as written by AI ⚠

AI DETECTION LIKELIHOOD

⚠ GPTZERO ⚠ OPENAI ⚠ WRITER ⚠ CROSSPLAG ⚠ COPYLEAKS ⚠ SAPLING ⚠ CONTENTATSCALE ⚠ ZEROGPT

KEY: 100% HUMAN 50% HUMAN 0% HUMAN

### 2.2.2. Zero GPT.com

Your Text is AI/GPT Generated

100% AI GPT\*

Stargazer, an ataxic and epileptic mutant mouse, lacks functional AMPA ( $\alpha$ -amino-3-hydroxyl-5-methyl-4-isoxazolepropionate) receptors on cerebellar granule cells; Stargazin, the mutated protein, interacts with both AMPA receptor subunits and synaptic PDZ proteins, such as PSD-95. The interaction of stargazin with AMPA receptor subunits is essential for delivering functional receptors to the surface membrane of granule cells, whereas its binding with PSD-95 and related PDZ proteins through a carboxy-terminal PDZ-binding domain is required for targeting the AMPA receptor to synapses. Expression of a mutant stargazin lacking the PDZ-binding domain in hippocampal pyramidal cells disrupts synaptic AMPA receptors, indicating that stargazin-like mechanisms for targeting AMPA receptors may be widespread in the central nervous system.

■ Highlighted text is suspected to be most likely generated by AI\*

PDF Export to PDF

### 2.2.3. ZeroGPT.net

 Your content appears to be crafted by GPT technology.



0.00%

is written by a human



100.00%

is generated by an AI/GPT

Bookmark This Tool

Detect new text

 \*The highlighted text appears to have been generated by an AI system.



Stargazer, an ataxic and epileptic mutant mouse, lacks functional AMPA (α-amino-3-hydroxy-5-methyl-4-isoxazolepropionate) receptors on cerebellar granule cells. Stargazin, the mutated protein, interacts with both AMPA receptor subunits and synaptic PDZ proteins, such as PSD-95. The interaction of stargazin with AMPA receptor subunits is essential for delivering functional receptors to the surface membrane of granule cells, whereas its binding with PSD-95 and related PDZ proteins through a carboxy-terminal PDZ-binding domain is required for targeting the AMPA receptor to synapses. Expression of a mutant stargazin lacking the PDZ-binding domain in hippocampal pyramidal cells disrupts synaptic AMPA receptors, indicating that stargazin-like mechanisms for targeting AMPA receptors may be widespread in the central nervous system.

Detect new text

### 2.2.4. Brandwell.ai

0% AI-generated

## 2.2.5. Winston AI

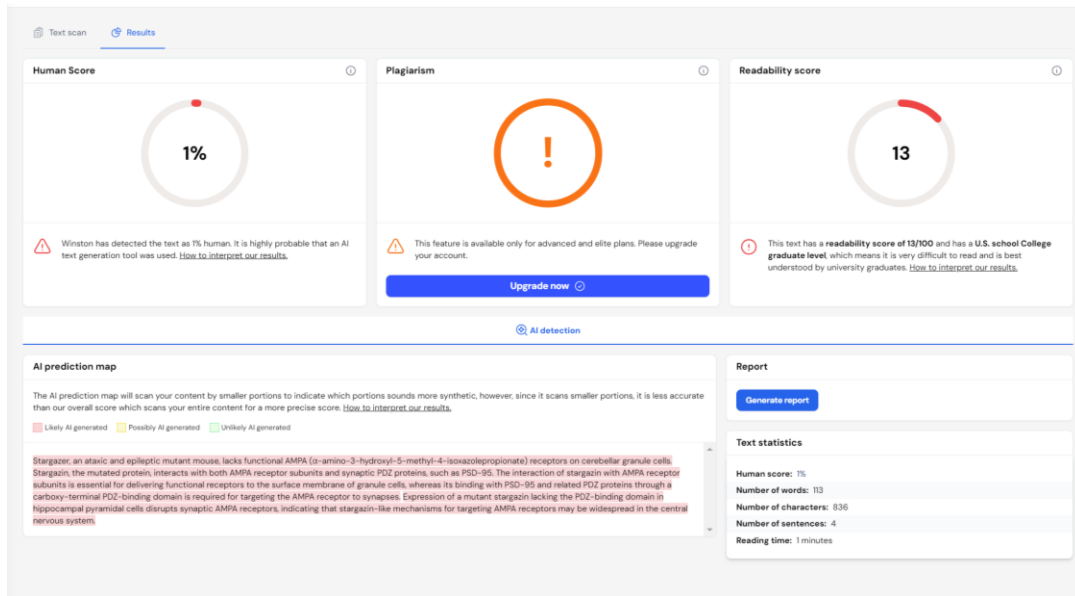

## 2.2.6. Crossplag

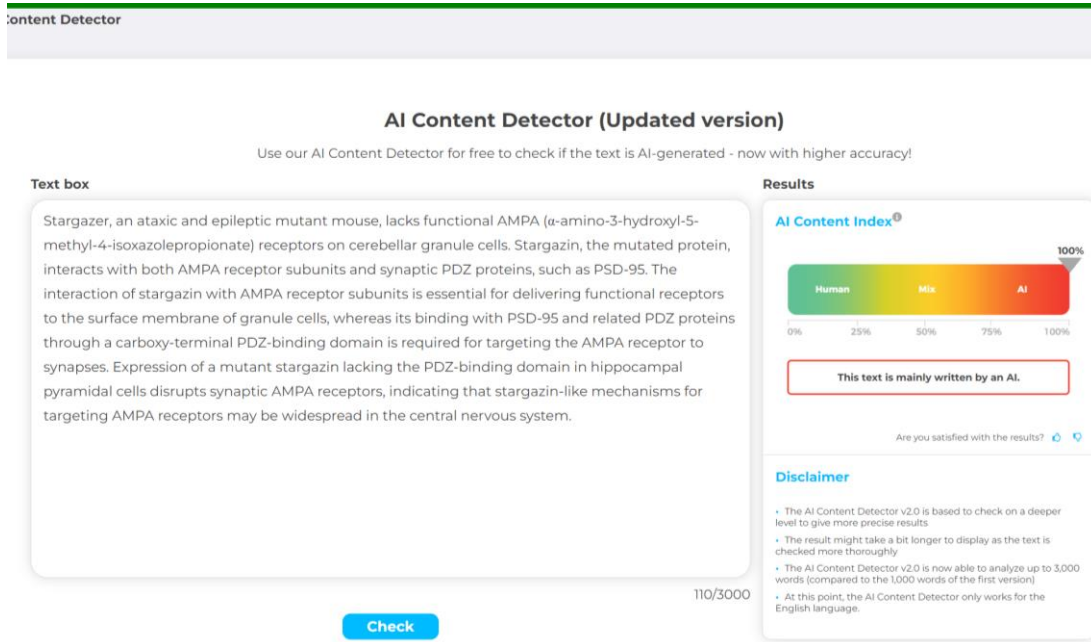

## 2.3. LeCun et al. [14]

### 2.3.1. Undetectable AI

READABILITY

University

PURPOSE

General Writing

807/15000 CHARS ≈ 116 WORDS

Deep learning allows computational models that are composed of multiple processing layers to learn representations of data with multiple levels of abstraction. These methods have dramatically improved the state-of-the-art in speech recognition, visual object recognition, object detection and many other domains such as drug discovery and genomics. Deep learning discovers intricate structure in large data sets by using the backpropagation algorithm to indicate how a machine should change its internal parameters that are used to compute the representation in each layer from the representation in the previous layer. Deep convolutional nets have brought about breakthroughs in processing images, video, speech and audio, whereas recurrent nets have shone light on sequential data such as text and speech.

WAITING FOR YOUR INPUT

MORE READABLE

BALANCED

MORE HUMAN

☒ I AGREE TO THE TERMS OF SERVICE (NO ACADEMIC MISCONDUCT)

CLEAR

CHECK FOR AI

HUMANIZE

⚠️ Your content is detected as written by AI ⚠️

AI DETECTION LIKELIHOOD

⚠️ GPTZERO ⚠️ OPENAI ⚠️ WRITER ⚠️ CROSSPLAG ✅ COPYLEAKS ⚠️ SAPLING ⚠️ CONTENTATSCALE ⚠️ ZEROGPT

KEY: 100% HUMAN 50% HUMAN 0% HUMAN

### 2.3.2. Zero GPT.com

Your Text is AI/GPT Generated

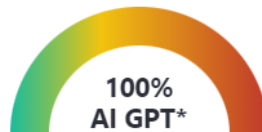

Deep learning allows computational models that are composed of multiple processing layers to learn representations of data with multiple levels of abstraction. These methods have dramatically improved the state-of-the-art in speech recognition, visual object recognition, object detection and many other domains such as drug discovery and genomics. Deep learning discovers intricate structure in large data sets by using the backpropagation algorithm to indicate how a machine should change its internal parameters that are used to compute the representation in each layer from the representation in the previous layer. Deep convolutional nets have brought about breakthroughs in processing images, video, speech and audio, whereas recurrent nets have shone light on sequential data such as text and speech.

■ Highlighted text is suspected to be most likely generated by AI\*

Export to PDF

### 2.3.3. ZeroGPT.net

 Your content appears to be crafted by GPT technology.

0.00%

is written by a human

100.00%

is generated by an AI/GPT

Bookmark This Tool

Detect new text

\*The highlighted text appears to have been generated by an AI system.



Deep learning allows computational models that are composed of multiple processing layers to learn representations of data with multiple levels of abstraction. These methods have dramatically improved the state-of-the-art in speech recognition, visual object recognition, object detection and many other domains such as drug discovery and genomics. Deep learning discovers intricate structure in large data sets by using the backpropagation algorithm to indicate how a machine should change its internal parameters that are used to compute the representation in each layer from the representation in the previous layer. Deep convolutional nets have brought about breakthroughs in processing images, video, speech and audio, whereas recurrent nets have shone light on sequential data such as text and speech.

Detect new text

### 2.3.4. Brandwell.ai

## AI Checker

The real-time AI Detector identifies text created by ChatGPT, Gemini, Claude, and various other language models. The real-time AI Checker, features a proprietary tech stack that works deeper than a generic AI classifier to find robotic sounding content. Focusing exclusively on website pages, blog posts, social media content, and email marketing messages. Paste your content below and start your free scan.

Deep learning allows computational models that are composed of multiple processing layers to learn representations of data with multiple levels of abstraction. These methods have dramatically improved the state-of-the-art in speech recognition, visual object recognition, object detection and many other domains such as drug discovery and genomics. Deep learning discovers intricate structure in large data sets by using the backpropagation algorithm to indicate how a machine should change its internal parameters that are used to compute the representation in each layer from the representation in the previous layer. Deep convolutional nets have brought about breakthroughs in processing images, video, speech and audio, whereas recurrent nets have shone light on sequential data such as text and speech.

807 / 2500 Characters

HUMANIZE IT

RE-DETECT

CHECK PLAGIARISM

RESET

#### Is it Human?

Our artificial intelligence detection software tells you if what you have reads like it is written by a human or if it sounds robotic. The AI Detector tries to forecast if your content is written by an LLM, or humanly written. With robotic-sounding content placing you in a position of inauthenticity, the need for a ChatGPT Detector is higher than ever.

#### Human Probability Results

 **READS LIKE AI!**



Predicted based upon **116 words**. [Increase this limit.](#)

Did you write this yourself? Unfortunately, it reads very machine-like. If you write like a robot, you're going to get graded like a robot. Produce



## 2.3.5. Winston AI

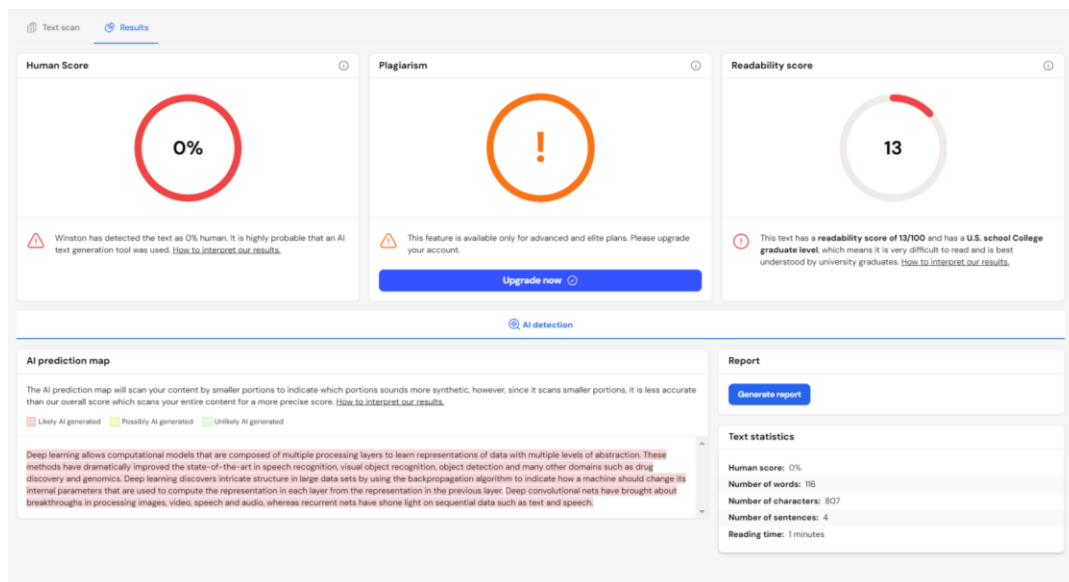

## 2.3.6. Crossplag

0% AI-generated

## 2.4. Jung et al. [15]

### 2.4.1. Undetectable AI

0% AI-generated

## 2.4.2. Zero GPT.com

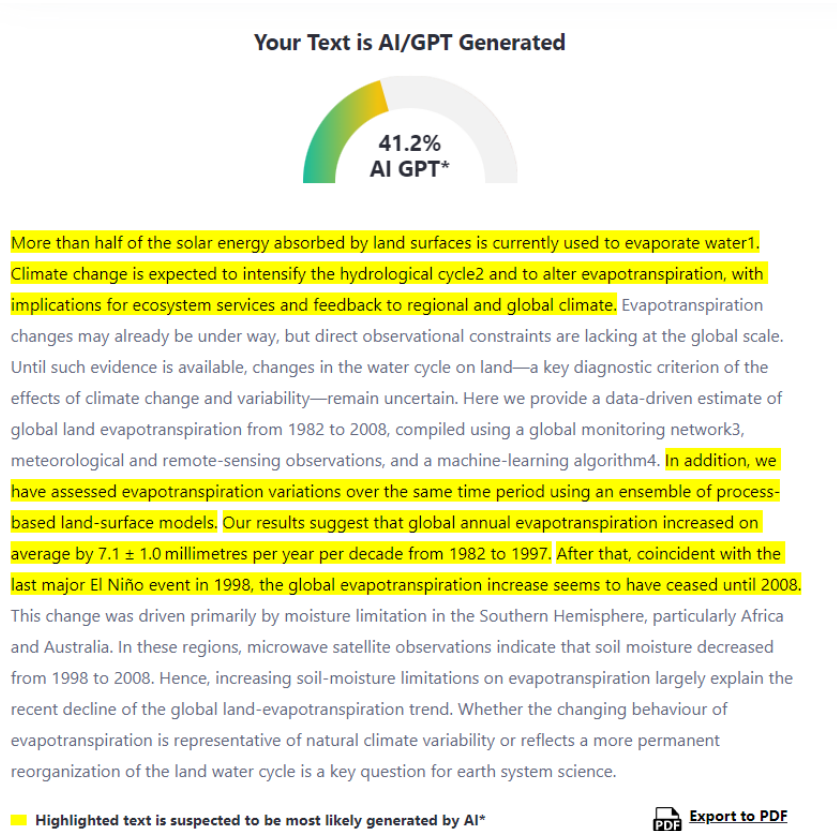

## 2.4.3. ZeroGPT.net

0% AI-generated

## 2.4.4. Brandwell.ai

0% AI-generated

## 2.4.5. Winston AI

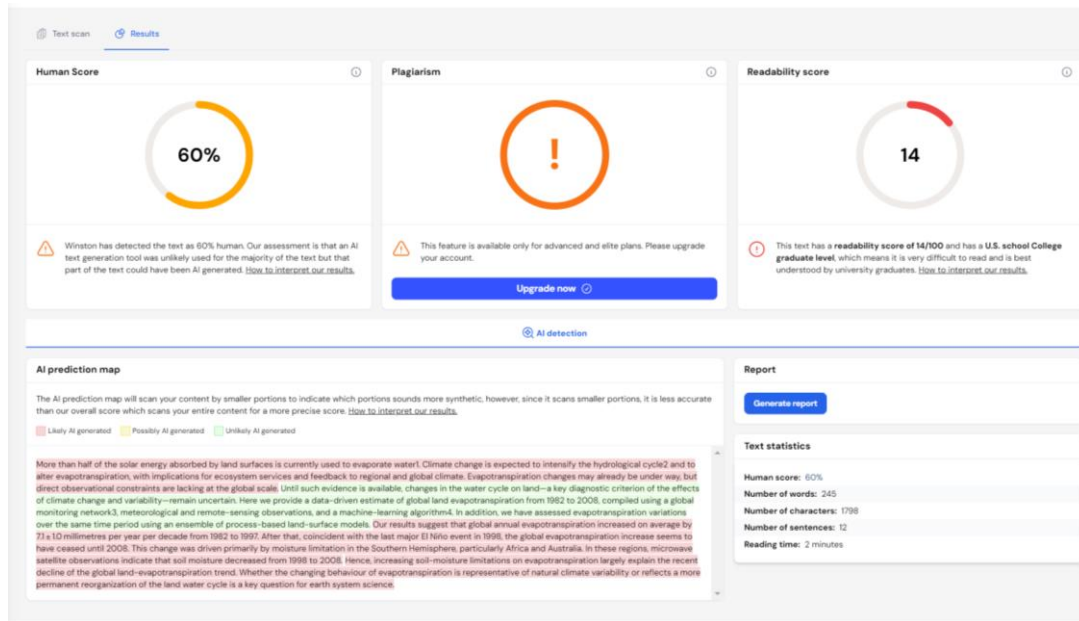

## 2.4.6. Crossplag

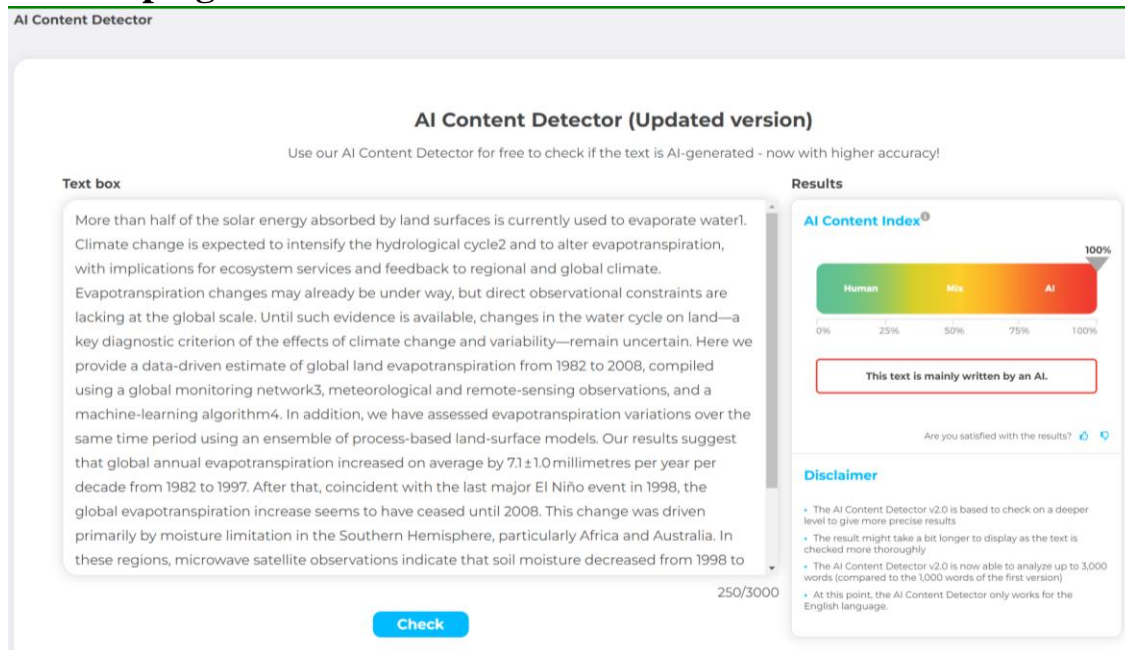

## 2.5. Barber et al. [16]

### 2.5.1. Undetectable AI

0% AI-generated

## 2.5.2. Zero GPT.com

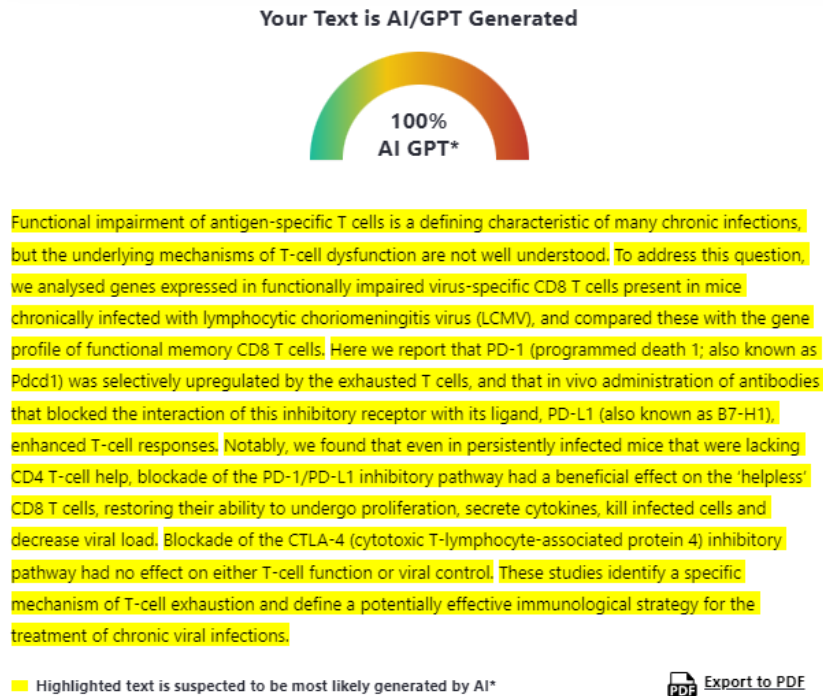

## 2.5.3. ZeroGPT.net

0% AI-generated

## 2.5.4. Brandwell.ai

0% AI-generated

## 2.5.5. Winston AI

0% AI-generated

## 2.5.6. Crossplag

AI Content Detector

---

**AI Content Detector (Updated version)**

Use our AI Content Detector for free to check if the text is AI-generated - now with higher accuracy!

**Text box**

Functional impairment of antigen-specific T cells is a defining characteristic of many chronic infections, but the underlying mechanisms of T-cell dysfunction are not well understood. To address this question, we analysed genes expressed in functionally impaired virus-specific CD8 T cells present in mice chronically infected with lymphocytic choriomeningitis virus (LCMV), and compared these with the gene profile of functional memory CD8 T cells. Here we report that PD-1 (programmed death 1; also known as Pdccl1) was selectively upregulated by the exhausted T cells, and that in vivo administration of antibodies that blocked the interaction of this inhibitory receptor with its ligand, PD-L1 (also known as B7-H1), enhanced T-cell responses. Notably, we found that even in persistently infected mice that were lacking CD4 T-cell help, blockade of the PD-1/PD-L1 inhibitory pathway had a beneficial effect on the 'helpless' CD8 T cells, restoring their ability to undergo proliferation, secrete cytokines, kill infected cells and decrease viral load. Blockade of the CTLA-4 (cytotoxic T-lymphocyte-associated protein 4) inhibitory pathway had no effect on either T-cell function or viral control. These studies identify a specific mechanism of T-cell exhaustion and define a potentially effective immunological strategy for the treatment of chronic viral infections.

198/3000

**Check**

**Results**

**AI Content Index<sup>®</sup>**

0% 25% 50% 75% 100%

Human Mix AI

This text is mainly written by an AI.

Are you satisfied with the results? [👍](#) [👎](#)

**Disclaimer**

- The AI Content Detector v2.0 is based to check on a deeper level to give more precise results
- The result might take a bit longer to display as the text is checked more thoroughly
- The AI Content Detector v2.0 is now able to analyze up to 3,000 words (compared to the 1,000 words of the first version)
- At this point, the AI Content Detector only works for the English language.

## 2.6. Tsukada et al. [17]

### 2.6.1. Undetectable AI

### 2.6.2. Zero GPT.com

### 2.6.3. ZeroGPT.net

### 2.6.4. Brandwell.ai

### 2.6.5. Winston AI

## 2.6.6. Crossplag

## 2.7. Al-Zahrani & Alasmari [18]

### 2.7.1. Undetectable AI

0% AI-generated

### 2.7.2. Zero GPT.com

**Your Text is AI/GPT Generated**



The increasing prevalence of Artificial Intelligence (AI) in higher education underscores the necessity to explore its implications on ethical, social, and educational dynamics within the sector. This study aims to comprehensively investigate the impact of AI on higher education in Saudi Arabia, delving into stakeholders' attitudes, perceptions, and expectations regarding its implementation. The research hones in on key facets of AI in higher education, encompassing its influence on teaching and learning, ethical and social implications, and the anticipated role of AI in the future. Employing a quantitative approach through an online survey questionnaire (N = 1113), this study reveals positive attitudes toward AI in higher education. Stakeholders recognize its potential to enhance teaching and learning, streamline administration, and foster innovation. Emphasis is placed on ethical considerations and guidelines for AI implementation, highlighting the imperative need to address issues such as privacy, security, and bias. Participants envision a future characterized by personalized learning experiences, ethically integrated AI, collaboration, and ongoing support for lifelong learning. Furthermore, the results illuminate the intricate interplay between AI usage, purposes, difficulties, and their impact on attitudes, perceptions, and future implications. Accordingly, the research underscores the necessity for a comprehensive understanding of AI integration, considering not only its technical aspects but also the ethical, social, and educational dimensions. By acknowledging the role of AI uses, AI usage purposes, and addressing associated difficulties, educational stakeholders can work towards harnessing the benefits of AI while ensuring responsible and effective implementation in teaching and learning contexts.

Highlighted text is suspected to be most likely generated by AI\*

 [Export to PDF](#)

## 2.7.3. ZeroGPT.net

[Home](#) [Chat GPT detector](#) [AI content detector](#) [API](#) [Blog](#) [Contact Us](#)

 Your content appears to be crafted by GPT technology.

We have great confidence that this text is fully AI Generated



5.30%

is written by a human



94.70%

is generated by an AI/GPT

[Bookmark This Tool](#)

[Detect new text](#)

 \*The highlighted text appears to have been generated by an AI system.

The increasing prevalence of Artificial Intelligence (AI) in higher education underscores the necessity to explore its implications on ethical, social, and educational dynamics within the sector. This study aims to comprehensively investigate the impact of AI on higher education in Saudi Arabia, delving into stakeholders' attitudes, perceptions, and expectations regarding its implementation. The research hones in on key facets of AI in higher education, encompassing its influence on teaching and learning, ethical and social implications, and the anticipated role of AI in the future. Employing a quantitative approach through an online survey questionnaire (N = 1113), this study reveals positive attitudes toward AI in higher education. Stakeholders recognize its potential to enhance teaching and learning, streamline administration, and foster innovation. Emphasis is placed on ethical considerations and guidelines for AI implementation, highlighting the imperative need to address issues such as privacy, security, and bias. Participants envision a future characterized by personalized learning experiences, ethically integrated AI, collaboration, and ongoing support for lifelong learning. Furthermore, the results illuminate the intricate interplay between AI usage, purposes, difficulties, and their impact on attitudes, perceptions, and future implications. Accordingly, the research underscores the necessity for a comprehensive understanding of AI integration, considering not only its technical aspects but also the ethical, social, and educational dimensions. By acknowledging the role of AI uses, AI usage purposes, and addressing associated difficulties, educational stakeholders can work towards harnessing the benefits of AI while ensuring responsible and effective implementation in teaching and learning contexts.

[Detect new text](#)

## 2.7.4. Brandwell.ai

### AI Checker

The real-time AI Detector identifies text created by ChatGPT, Gemini, Claude, and various other language models. The real-time AI Checker, features a proprietary tech stack that works deeper than a generic AI classifier to find robotic sounding content. Focusing exclusively on website pages, blog posts, social media content, and email marketing messages. Paste your content below and start your free scan.

The increasing prevalence of Artificial Intelligence (AI) in higher education underscores the necessity to explore its implications on ethical, social, and educational dynamics within the sector. This study aims to comprehensively investigate the impact of AI on higher education in Saudi Arabia, delving into stakeholders' attitudes, perceptions, and expectations regarding its implementation. The research hones in on key facets of AI in higher education, encompassing its influence on teaching and learning, ethical and social implications, and the anticipated role of AI in the future. Employing a quantitative approach through an online survey questionnaire (N = 1113), this study reveals positive attitudes toward AI in higher education. Stakeholders recognize its potential to enhance teaching and learning, streamline administration, and foster innovation. Emphasis is placed on ethical considerations and guidelines for AI implementation, highlighting the imperative need to address issues such as privacy, security, and bias. Participants envision a future characterized by personalized learning experiences, ethically integrated AI, collaboration, and ongoing support for lifelong learning. Furthermore, the results illuminate the intricate interplay between AI usage, purposes, difficulties, and their impact on attitudes, perceptions, and future implications. Accordingly, the research underscores the necessity for a comprehensive understanding of AI integration, considering not only its technical aspects but also the ethical, social, and educational dimensions. By acknowledging the role of AI uses, AI usage purposes, and addressing associated difficulties, educational stakeholders can work towards harnessing the benefits of AI while ensuring responsible and effective implementation in teaching and learning contexts.

1838 / 2500 Characters

Is it Human?

Our artificial intelligence detection software tells you if what you have reads like it is written by a human or if it sounds robotic. The AI Detector tries to forecast if your content is written by an LLM, or humanly written. With robotic-sounding content placing you in a position of inauthenticity, the need for a ChatGPT Detector is higher than ever.

**Human Probability Results**

😬 READS LIKE AI!



Predicted based upon **244 words**. **Increase this limit.**

Did you write this yourself? Unfortunately, it reads very machine-like. If you write like a robot, you're going to get graded like a robot. Produce

HUMANIZE IT

RE-DETECT

CHECK PLAGIARISM

RESET

## 2.7.5. Winston AI

Text scan Results

**Human Score**

0%

Winston has detected the text as 0% human. It is highly probable that an AI text generation tool was used. [How to interpret our results.](#)

**Plagiarism**

! This feature is available only for advanced and elite plans. Please upgrade your account.

[Upgrade now](#)

**Readability score**

0

This text has a **readability score of 0/100** and has a **U.S. school Professional level**, which means it is extremely difficult to read and is best understood by university graduates. [How to interpret our results.](#)

**AI detection**

**AI prediction map**

The AI prediction map will scan your content by smaller portions to indicate which portions sounds more synthetic, however, since it scans smaller portions, it is less accurate than our overall score which scans your entire content for a more precise score. [How to interpret our results.](#)

🔴 Likely AI generated 🟡 Possibly AI generated 🟢 Unlikely AI generated

The increasing prevalence of Artificial Intelligence (AI) in higher education underscores the necessity to explore its implications on ethical, social, and educational dynamics within the sector. This study aims to comprehensively investigate the impact of AI on higher education in Saudi Arabia, delving into stakeholders' attitudes, perceptions, and expectations regarding its implementation. The research hones in on key facets of AI in higher education, encompassing its influence on teaching and learning, ethical and social implications, and the anticipated role of AI in the future. Employing a quantitative approach through an online survey questionnaire (N = 1113), this study reveals positive attitudes toward AI in higher education. Stakeholders recognize its potential to enhance teaching and learning, streamline administration, and foster innovation. Emphasis is placed on ethical considerations and guidelines for AI implementation, highlighting the imperative need to address issues such as privacy, security, and bias. Participants envision a future characterized by personalized learning experiences, ethically integrated AI, collaboration, and ongoing support for lifelong learning. Furthermore, the results illuminate the intricate interplay between AI usage, purposes, difficulties, and their impact on attitudes, perceptions, and future implications. Accordingly, the research underscores the necessity for a comprehensive understanding of AI integration, considering not only its technical aspects but also the ethical, social, and educational dimensions. By acknowledging the role of AI uses, AI usage purposes, and addressing associated difficulties, educational stakeholders can work towards harnessing the benefits of AI while ensuring responsible and effective implementation in teaching and learning contexts.

**Report**

[Generate report](#)

**Text statistics**

Human score: 0%

Number of words: 244

Number of characters: 1838

Number of sentences: 10

Reading time: 2 minutes



## 2.7.6. Crossplag

0% AI-generated

## 2.8. Jordan & Mitchell [19]

### 2.8.1. Undetectable AI

READABILITY

University

PURPOSE

General Writing

781/15000 CHARS = 110 WORDS

Machine learning addresses the question of how to build computers that improve automatically through experience. It is one of today's most rapidly growing technical fields, lying at the intersection of computer science and statistics, and at the core of artificial intelligence and data science. Recent progress in machine learning has been driven both by the development of new learning algorithms and theory and by the ongoing explosion in the availability of online data and low-cost computation. The adoption of data-intensive machine-learning methods can be found throughout science, technology and commerce, leading to more evidence-based decision-making across many walks of life, including health care, manufacturing, education, financial modeling, policing, and marketing.

WAITING FOR YOUR INPUT

MORE READABLE

BALANCED

MORE HUMAN

☒ I AGREE TO THE TERMS OF SERVICE (NO ACADEMIC MISCONDUCT)

CLEAR

CHECK FOR AI

HUMANIZE

⚠ Your content is detected as written by AI ⚠

AI DETECTION LIKELIHOOD

⚠ GPTZERO ⚠ OPENAI ⚠ WRITER ⚠ CROSSPLAG ✓ COPYLEAKS ⚠ SAPLING ⚠ CONTENTATSCALE ⚠ ZEROGPT

KEY: 100% HUMAN 50% HUMAN 0% HUMAN

### 2.8.2. Zero GPT.com

Your Text contains mixed signals, with some parts generated by AI/GPT

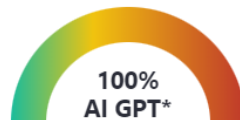

Machine learning addresses the question of how to build computers that improve automatically through experience. It is one of today's most rapidly growing technical fields, lying at the intersection of computer science and statistics, and at the core of artificial intelligence and data science. Recent progress in machine learning has been driven both by the development of new learning algorithms and theory and by the ongoing explosion in the availability of online data and low-cost computation. The adoption of data-intensive machine-learning methods can be found throughout science, technology and commerce, leading to more evidence-based decision-making across many walks of life, including health care, manufacturing, education, financial modeling, policing, and marketing.

■ Highlighted text is suspected to be most likely generated by AI\*

Export to PDF

### 2.8.3. ZeroGPT.net

 Your content appears to be crafted by GPT technology.



0.00%

is written by a human



100.00%

is generated by an AI/GPT

Bookmark This Tool

Detect new text

 \*The highlighted text appears to have been generated by an AI system.

Machine learning addresses the question of how to build computers that improve automatically through experience. It is one of today's most rapidly growing technical fields, lying at the intersection of computer science and statistics, and at the core of artificial intelligence and data science. Recent progress in machine learning has been driven both by the development of new learning algorithms and theory and by the ongoing explosion in the availability of online data and low-cost computation. The adoption of data-intensive machine-learning methods can be found throughout science, technology and commerce, leading to more evidence-based decision-making across many walks of life, including health care, manufacturing, education, financial modeling, policing, and marketing.

Detect new text

### 2.8.4. Brandwell.ai

Machine learning addresses the question of how to build computers that improve automatically through experience. It is one of today's most rapidly growing technical fields, lying at the intersection of computer science and statistics, and at the core of artificial intelligence and data science. Recent progress in machine learning has been driven both by the development of new learning algorithms and theory and by the ongoing explosion in the availability of online data and low-cost computation. The adoption of data-intensive machine-learning methods can be found throughout science, technology and commerce, leading to more evidence-based decision-making across many walks of life, including health care, manufacturing, education, financial modeling, policing, and marketing.

781 / 2500 Characters

#### Is it Human?

Our artificial intelligence detection software tells you if what you have reads like it is written by a human or if it sounds robotic. The AI Detector tries to forecast if your content is written by an LLM, or humanly written. With robotic-sounding content placing you in a position of inauthenticity, the need for a ChatGPT Detector is higher than ever.

#### Human Probability Results

😬 READS LIKE AI!



## 2.8.5. Winston AI

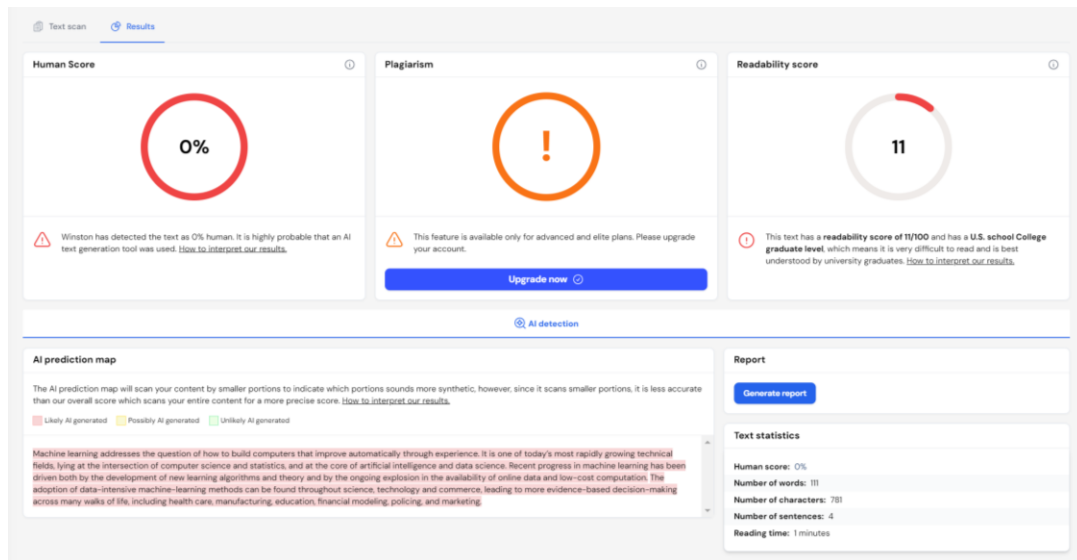

## 2.8.6. Crossplag

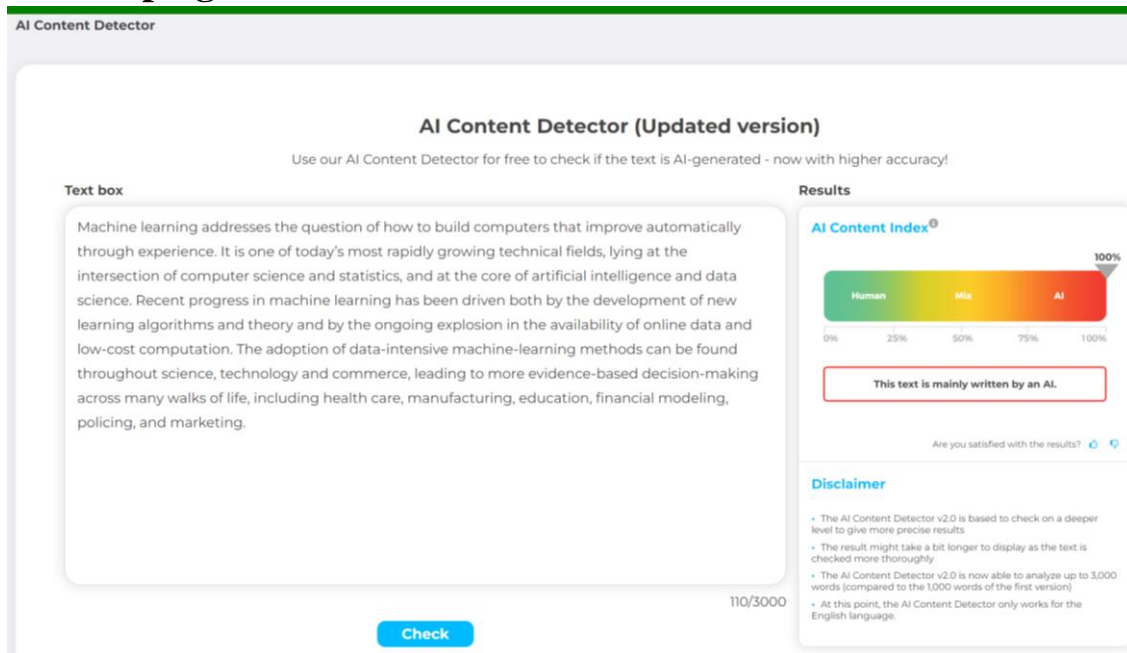

## 2.9. Nishiie et al. [20]

### 2.9.1. Undetectable AI

0% AI-generated

## 2.9.2. Zero GPT.com

Your Text is AI/GPT Generated

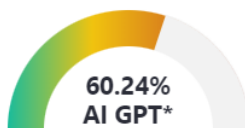

Model carboxy-exchange reaction by conjugate substitution reaction

To examine the potential for carboxy-exchange by the conjugate substitution reaction, methyl  $\alpha$ -(acetoxymethyl)acrylate (1a) was treated with benzoic acid (2b) in deuterated chloroform ( $\text{CDCl}_3$ ) in the presence of 1,4-diazabicyclo[2.2.2]octane (DABCO) (Fig. 1B). The  $^1\text{H}$  NMR spectrum of the reaction mixture after 36 h showed a new set of signals (Figs. 1C, 6.4 and 5.9 ppm for vinylidene protons, and 4.9 ppm for allylic protons), suggesting the generation of  $\alpha$ -(benzoyloxymethyl)acrylate (1b). Figure 1D shows the change of molar fraction of 1a estimated as an intensity ratio of allylic-proton signals (4.7 ppm for 1a and 4.9 ppm for 1b, respectively). The reaction system reached equilibrium within 9 h at 25  $^\circ\text{C}$ , which suggested a reversible carboxy-exchange reaction. Notably, no reactions were observed using triethylamine (TEA) and 1,5,7-triazabicyclo[4.4.0]dec-5-ene (TBD) as the catalysts with lower nucleophilicity than DABCO. These results suggest that the formation of ammonium intermediates (3a and 3b) is the key to promoting the reaction because the nucleophilicity of the tertiary amine catalyst significantly affects the reaction rate.

Highlighted text is suspected to be most likely generated by AI\*

 [Export to PDF](#)

### 2.9.3. ZeroGPT.net

 There's a likelihood that your text was generated by GPT.



40.06%

is written by a human



59.94%

is generated by an AI/GPT

[Bookmark This Tool](#)

[Detect new text](#)

☐ \*The highlighted text appears to have been generated by an AI system.



Model carboxy-exchange reaction by conjugate substitution reaction

To examine the potential for carboxy-exchange by the conjugate substitution reaction, methyl  $\alpha$ -(acetoxymethyl)acrylate (**1a**) was treated with benzoic acid (**2b**) in deuterated chloroform ( $\text{CDCl}_3$ ) in the presence of 1,4-diazabicyclo[2.2.2]octane (DABCO) (Fig. 1B). The  $^1\text{H}$  NMR spectrum of the reaction mixture after 36 h showed a new set of signals (Fig. 1C, 6.4 and 5.9 ppm for vinylidene protons, and 4.9 ppm for allylic protons), suggesting the generation of  $\alpha$ -(benzoyloxymethyl)acrylate (**1b**). Figure 1D shows the change of molar fraction of **1a** estimated as an intensity ratio of allylic-proton signals (4.7 ppm for **1a** and 4.9 ppm for **1b**, respectively). The reaction system reached equilibrium within 9 h at 25  $^\circ\text{C}$ , which suggested a reversible carboxy-exchange reaction. Notably, no reactions were observed using triethylamine (TEA) and 1,5,7-triazabicyclo[4.4.0]dec-5-ene (TBD) as the catalysts with lower nucleophilicity than DABCO. These results suggest that the formation of ammonium intermediates (**3a** and **3b**) is the key to promoting the reaction because the nucleophilicity of the tertiary amine catalyst significantly affects the reaction rate.

[Detect new text](#)

### 2.9.4. Brandwell.ai

0% AI-generated

### 2.9.5. Winston AI

0% AI-generated

## 2.9.6. Crossplag

**AI Content Detector**

**AI Content Detector (Updated version)**

Use our AI Content Detector for free to check if the text is AI-generated - now with higher accuracy!

**Text box**

Model carboxy-exchange reaction by conjugate substitution reaction

To examine the potential for carboxy-exchange by the conjugate substitution reaction, methyl  $\alpha$ -(acetoxymethyl)acrylate (1a) was treated with benzoic acid (2b) in deuterated chloroform (CDCl<sub>3</sub>) in the presence of 1,4-diazabicyclo[2.2.2]octane (DABCO) (Fig. 1B). The <sup>1</sup>H NMR spectrum of the reaction mixture after 36 h showed a new set of signals (Figs. 1C, 6.4 and 5.9 ppm for vinylidene protons, and 4.9 ppm for allylic protons), suggesting the generation of  $\alpha$ -(benzoyloxymethyl)acrylate (1b). Figure 1D shows the change of molar fraction of 1a estimated as an intensity ratio of allylic-proton signals (4.7 ppm for 1a and 4.9 ppm for 1b, respectively). The reaction system reached equilibrium within 9 h at 25 °C, which suggested a reversible carboxy-exchange reaction. Notably, no reactions were observed using triethylamine (TEA) and 1,5,7-triazabicyclo[4.4.0]dec-5-ene (TBD) as the catalysts with lower nucleophilicity than DABCO. These results suggest that the formation of ammonium intermediates (3a and 3b) is the key to promoting the reaction because the nucleophilicity of the tertiary amine catalyst significantly affects the reaction rate.

165/3000

**Check**

**Results**

**AI Content Index®**

66%

Human Mix AI

0% 25% 50% 75% 100%

This text is co-written by both a human and an AI

Are you satisfied with the results?  

**Disclaimer**

- The AI Content Detector v2.0 is based to check on a deeper level to give more precise results
- The result might take a bit longer to display as the text is checked more thoroughly
- The AI Content Detector v2.0 is now able to analyze up to 3,000 words (compared to the 1,000 words of the first version)
- At this point, the AI Content Detector only works for the English language.

## 2.10. Peng et al. [21]

### 2.10.1. Undetectable AI

0% AI-generated

### 2.10.2. Zero GPT.com

0% AI-generated

### 2.10.3. ZeroGPT.net

0% AI-generated

### 2.10.4. Brandwell.ai

0% AI-generated

## 2.10.5. Winston AI

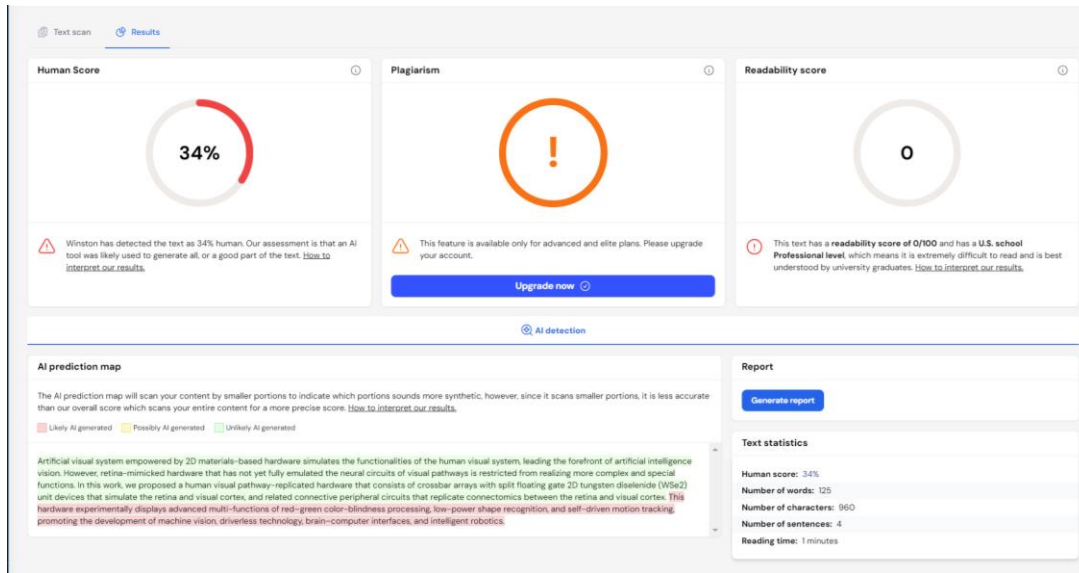

## 2.10.6. Crossplag

0% AI-generated

## 2.11. Guo et al. [22], Abstract

### 2.11.1. Undetectable AI

0% AI-generated

## 2.11.2. Zero GPT.com

Your Text is AI/GPT Generated

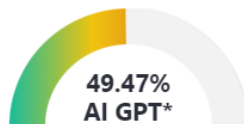

The limited efficacy of cancer immunotherapy occurs due to the lack of spatiotemporal orchestration of adaptive immune response stimulation and immunosuppressive tumor microenvironment modulation. Herein, we report a nanoplatform fabricated using a pH-sensitive triblock copolymer synthesized by reversible addition-fragmentation chain transfer polymerization enabling in situ tumor vaccination and tumor-associated macrophages (TAMs) polarization. The nanocarrier itself can induce melanoma immunogenic cell death (ICD) via tertiary amines and thioethers concentrating on mitochondria to regulate metabolism in triggering endoplasmic reticulum stress and upregulating gasdermin D for pyroptosis as well as some features of ferroptosis and apoptosis. After the addition of ligand cyclic arginine-glycine-aspartic acid (cRGD) and mannose, the mixed nanocarrier with immune adjuvant resiquimod encapsulation can target B16F10 cells for in situ tumor vaccination and TAMs for M1 phenotype polarization. In vivo studies indicate that the mixed targeting nanoplatform elicits tumor ICD, dendritic cell maturation, TAM polarization, and cytotoxic T lymphocyte infiltration and inhibits melanoma volume growth. In combination with immune checkpoint blockade, the survival time of mice is markedly prolonged. This study provides a strategy for utilizing immunoactive materials in the innate and adaptive immune responses to augment cancer therapy.

Highlighted text is suspected to be most likely generated by AI\*

 [Export to PDF](#)



### 2.11.3. ZeroGPT.net

👤 Your text is a blend of signals, some parts likely generated by GPT.



50.83%

is written by a human



49.17%

is generated by an AI/GPT

[Bookmark This Tool](#)

[Detect new text](#)

🟡 \*The highlighted text appears to have been generated by an AI system.



Read comics, manga and more on any device.  
comi:ology

The limited efficacy of cancer immunotherapy occurs due to the lack of spatiotemporal orchestration of adaptive immune response stimulation and immunosuppressive tumor microenvironment modulation. Herein, we report a nanoplatform fabricated using a pH-sensitive triblock copolymer synthesized by reversible addition-fragmentation chain transfer polymerization enabling in situ tumor vaccination and tumor-associated macrophages (TAMs) polarization. The nanocarrier itself can induce melanoma immunogenic cell death (ICD) via tertiary amines and thioethers concentrating on mitochondria to regulate metabolism in triggering endoplasmic reticulum stress and upregulating gasdermin D for pyroptosis as well as some features of ferroptosis and apoptosis. After the addition of ligand cyclic arginine-glycine-aspartic acid (cRGD) and mannose, the mixed nanocarrier with immune adjuvant resiquimod encapsulation can target B16F10 cells for in situ tumor vaccination and TAMs for M1 phenotype polarization. In vivo studies indicate that the mixed targeting nanoplatform elicits tumor ICD, dendritic cell maturation, TAM polarization, and cytotoxic T lymphocyte infiltration and inhibits melanoma volume growth. In combination with immune checkpoint blockade, the survival time of mice is markedly prolonged. This study provides a strategy for utilizing immunoactive materials in the innate and adaptive immune responses to augment cancer therapy.

[Detect new text](#)

### 2.11.4. Brandwell.ai

0% AI-generated

### 2.11.5. Winston AI

0% AI-generated

### 2.11.6. Crossplag

0% AI-generated

## 2.12. Guo et al. [22], Results

### 2.12.1. Undetectable AI

0% AI-generated

### 2.12.2. Zero GPT.com

Your Text is AI/GPT Generated

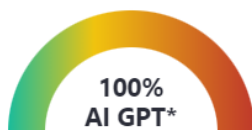

The successful synthesis of polymers is a prerequisite for constructing nanoplateforms. Before the synthesis of the skeleton polymer, polyethylene glycol-poly methyl methacrylate (PEG-PMMA), the macro-reversible addition-fragmentation chain transfer (RAFT) polymerization agent PEG-CPPA was synthesized via an amidation reaction between PEG-NH<sub>2</sub> and NHS-CPPA (Supplementary Fig. 1). The conversion ratio of NHS-CPPA that was the abbreviation of a small molecule RAFT agent known as 4-Cyano-4-(phenylcarbonothioylthio)pentanoic acid N-succinimidyl ester was 98% based on peaks of methylene protons in PEG ( $\delta$ , 3.63 ppm) and methine protons in CPPA ( $\delta$ , 7.38, 7.57, and 7.90 ppm) of <sup>1</sup>H NMR spectra (Supplementary Fig. 3). Di-block copolymer PEG-PMMA (named as PMMA) was obtained through RAFT polymerization of PEG-CPPA and monomer MMA, and the molecular weight was 5.0-10.0 kg/mol according to the peaks of PEG protons ( $\delta$ , 3.63 ppm) and methyl protons in PMMA ( $\delta$ , 3.65 ppm) of <sup>1</sup>H NMR spectra. GPC indicated that the relative molecular weight was 15.3 kg/mol with a polydispersity index (PDI) of 1.3 (Fig. 2a, b, Supplementary Fig. 4 and Supplementary Table 1). Tri-block copolymer PEG-PMMA-PDEA (termed as PDEA) was synthesized by PEG-PMMA and monomer diethylaminoethyl methacrylate (DEA) via RAFT polymerization (Supplementary Fig. 1), and the molecular weight was 5.0-10.0-3.8 kg/mol based on methylene protons in PEG ( $\delta$ , 3.63 ppm) and methylene protons in PDEA ( $\delta$ , 0.86 and 1.26 ppm) of <sup>1</sup>H NMR spectra. GPC indicated that the relative molecular weight was 19.2 kg/mol (Fig. 2a, b, Supplementary Fig. 5 and Supplementary Table 1).

■ Highlighted text is suspected to be most likely generated by AI\*

 [Export to PDF](#)

### 2.12.3. ZeroGPT.net

zerogpt

Home Chat GPT detector AI content detector API Blog Contact Us English

🤖 Your content appears to be crafted by GPT technology.

0.00%

is written by a human

100.00%

is generated by an AI/GPT

Bookmark This Tool

Detect new text

\*The highlighted text appears to have been generated by an AI system.

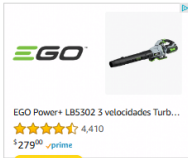

EGO Power+ LBS302 3 velocidades Turb...  
★★★★★ 4,410  
\$279<sup>00</sup> -prime

The successful synthesis of polymers is a prerequisite for constructing nanoplatfoms. Before the synthesis of the skeleton polymer, poly(ethylene glycol)-poly(methyl methacrylate) (PEG-PMMA), the macro-reversible addition-fragmentation chain transfer (RAFT) polymerization agent PEG-CPPA was synthesized via an amidation reaction between PEG-NH<sub>2</sub> and NHS-CPPA (Supplementary Fig. 1). The conversion ratio of NHS-CPPA that was the abbreviation of a small molecule RAFT agent known as 4-cyano-4-(phenylcarbonothioylthio)pentanoic acid N-succinimidyl ester was 98% based on peaks of methylene protons in PEG (δ, 3.63 ppm) and methine protons in CPPA (δ, 7.38, 7.57, and 7.90 ppm) of <sup>1</sup>H NMR spectra (Supplementary Fig. 3). Bi-block copolymer PEG-PMMA (named as PMMA) was obtained through RAFT polymerization of PEG-CPPA and monomer MMA, and the molecular weight was 5.0-10.0 kg/mol according to the peaks of PEG protons (δ, 3.63 ppm) and methyl protons in PMMA (δ, 3.65 ppm) of <sup>1</sup>H NMR spectra. GPC indicated that the relative molecular weight was 15.3 kg/mol with a polydispersity index (PDI) of 1.3 (Fig. 2a, b, Supplementary Fig. 4 and Supplementary Table 1). Tri-block copolymer PEG-PMMA-PDEA (lamed as PDEA) was synthesized by PEG-PMMA and monomer diethylaminoethyl methacrylate (DEA) via RAFT polymerization (Supplementary Fig. 1), and the molecular weight was 5.0-10.0-3.8 kg/mol based on methylene protons in PEG (δ, 3.63 ppm) and methylene protons in PDEA (δ, 0.88 and 1.25 ppm) of <sup>1</sup>H NMR spectra. GPC indicated that the relative molecular weight was 19.2 kg/mol (Fig. 2a, b, Supplementary Fig. 5 and Supplementary Table 1).

Detect new text

### 2.12.4. Brandwell.ai

0% AI-generated

### 2.12.5. Winston AI

0% AI-generated

## 2.12.6. Crossplag

AI Content Detector

### AI Content Detector (Updated version)

Use our AI Content Detector for free to check if the text is AI-generated - now with higher accuracy!

Text box

The successful synthesis of polymers is a prerequisite for constructing nanoplateforms. Before the synthesis of the skeleton polymer, polyethylene glycol-poly methyl methacrylate (PEG-PMMA), the macro-reversible addition-fragmentation chain transfer (RAFT) polymerization agent PEG-CPPA was synthesized via an amidation reaction between PEG-NH<sub>2</sub> and NHS-CPPA (Supplementary Fig. 1). The conversion ratio of NHS-CPPA that was the abbreviation of a small molecule RAFT agent known as 4-Cyano-4-(phenylcarbonothioylthio)pentanoic acid N-succinimidyl ester was 98% based on peaks of methylene protons in PEG ( $\delta$ , 3.63 ppm) and methine protons in CPPA ( $\delta$ , 7.38, 7.57, and 7.90 ppm) of <sup>1</sup>H NMR spectra (Supplementary Fig. 3). Di-block copolymer PEG-PMMA (named as PMMA) was obtained through RAFT polymerization of PEG-CPPA and monomer MMA, and the molecular weight was 5.0-10.0 kg/mol according to the peaks of PEG protons ( $\delta$ , 3.63 ppm) and methyl protons in PMMA ( $\delta$ , 3.65 ppm) of <sup>1</sup>H NMR spectra. GPC indicated that the relative molecular weight was 15.3 kg/mol with a polydispersity index (PDI) of 1.3 (Fig. 2a, b, Supplementary Fig. 4 and Supplementary Table 1). Tri-block copolymer PEG-PMMA-PDEA (termed as PDEA) was synthesized by PEG-PMMA and monomer diethylaminoethyl methacrylate (DEA) via RAFT polymerization (Supplementary Fig. 1), and the molecular weight was 5.0-10.0-3.8 kg/mol based on

499/3000

Check

Results

AI Content Index<sup>®</sup>

Human

Mix

AI

0% 25% 50% 75% 100%

71%

This text is mainly written by an AI.

Are you satisfied with the results?

Disclaimer

- The AI Content Detector v2.0 is based to check on a deeper level to give more precise results
- The result might take a bit longer to display as the text is checked more thoroughly
- The AI Content Detector v2.0 is now able to analyze up to 3,000 words (compared to the 1,000 words of the first version)
- At this point, the AI Content Detector only works for the English language.

56

### 3. Prominent Journals' Website

#### 3.1. Nature npj, artificial intelligence [23]

##### 3.1.1. Undetectable AI

0% AI-generated

##### 3.1.2. Zero GPT.com

**Your Text is AI/GPT Generated**

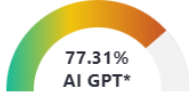

77.31%  
AI GPT\*

npj Artificial Intelligence considers research that explores all aspects of Artificial Intelligence research and development including application and implementation of these technologies. The journal considers original research articles, brief communications, comments, perspectives, and reviews.

The aim of npj Artificial Intelligence is to establish itself as a premier journal that publishes transformative research in artificial intelligence, fostering an interdisciplinary community that drives innovation and addresses the ethical and societal implications of AI technologies. We seek to bridge the gap between theoretical advancements and practical applications, emphasizing the significant impact of AI across various scientific disciplines, society, and industry. The journal will spotlight groundbreaking studies that reframe classic research challenges and propose novel solutions within the AI paradigm, inspiring diverse explorations that pave the way for future AI-driven scientific inquiry. By cultivating a vibrant and inclusive platform, we aim to showcase cutting-edge progress in AI that meets the evolving needs of the scientific community while encouraging contributions that go beyond incremental improvements in existing AI models.

npj Artificial Intelligence welcomes submissions that align with the following scopes:

- 1. Transformative AI Research**
  - Original studies that develop novel algorithms, methodologies, or frameworks that significantly advance the field of artificial intelligence.
- 2. Interdisciplinary Applications**
  - Research that explores the application of AI across diverse scientific disciplines, including but not limited to biology, medicine, environmental science, social sciences, and engineering.
- 3. Ethical and Societal Implications**
  - Critical analyses addressing the ethical challenges, societal impacts, and governance of AI technologies, including issues of bias, transparency, accountability, and privacy.
- 4. Bridging Theory and Practice**
  - Studies that demonstrate the practical application of theoretical advancements in AI, showcasing real-world implementations and case studies that highlight AI's impact on industry and society.
- 5. Reframing Research Challenges**
  - Innovative approaches that redefine classic research problems within the AI domain, proposing new solutions and methodologies that push the boundaries of current understanding.
- 6. Diverse Explorations**
  - Contributions that inspire and promote diverse explorations of AI, encouraging interdisciplinary collaboration and the integration of insights from various fields.
- 7. Future Directions in AI Research**
  - Forward-looking studies that outline potential future trends, challenges, and opportunities in AI, guiding the direction of research and innovation in the field.

### 3.1.3. ZeroGPT.net

 The majority of your content seems to be generated by GPT.



13.04%

is written by a human



86.96%

is generated by an AI/GPT

[Bookmark This Tool](#)[Detect new text](#)

 \*The highlighted text appears to have been generated by an AI system.

**Aims & Scope**

npj Artificial Intelligence considers research that explores all aspects of Artificial Intelligence research and development including application and implementation of these technologies. The journal considers original research articles, brief communications, comments, perspectives, and reviews.

The aim of npj Artificial Intelligence is to establish itself as a premier journal that publishes transformative research in artificial intelligence, fostering an interdisciplinary community that drives innovation and addresses the ethical and societal implications of AI technologies. We seek to bridge the gap between theoretical advancements and practical applications, emphasizing the significant impact of AI across various scientific disciplines, society, and industry. The journal will spotlight groundbreaking studies that reframe classic research challenges and propose novel solutions within the AI paradigm, inspiring diverse explorations that pave the way for future AI-driven scientific inquiry. By cultivating a vibrant and inclusive platform, we aim to showcase cutting-edge progress in AI that meets the evolving needs of the scientific community while encouraging contributions that go beyond incremental improvements in existing AI models.

npj Artificial Intelligence welcomes submissions that align with the following scopes:

- Transformative AI Research**
  - Original studies that develop novel algorithms, methodologies, or frameworks that significantly advance the field of artificial intelligence.
- Interdisciplinary Applications**
  - Research that explores the application of AI across diverse scientific disciplines, including but not limited to biology, medicine, environmental science, social sciences, and engineering.
- Ethical and Societal Implications**
  - Critical analyses addressing the ethical challenges, societal impacts, and governance of AI technologies, including issues of bias, transparency, accountability, and privacy.
- Bridging Theory and Practice**
  - Studies that demonstrate the practical application of theoretical advancements in AI, showcasing real-world implementations and case studies that highlight AI's impact on industry and society.
- Reframing Research Challenges**
  - Innovative approaches that redefine classic research problems within the AI domain, proposing new solutions and methodologies that push the boundaries of current understanding.
- Diverse Explorations**

[Detect new text](#)

### 3.1.4. Brandwell.ai

## AI Checker

The real-time AI Detector identifies text created by ChatGPT, Gemini, Claude, and various other language models. The real-time AI Checker, features a proprietary tech stack that works deeper than a generic AI classifier to find robotic sounding content. Focusing exclusively on website pages, blog posts, social media content, and email marketing messages. Paste your content below and start your free scan.

npj Artificial Intelligence considers research that explores all aspects of Artificial Intelligence research and development including application and implementation of these technologies. The journal considers original research articles, brief communications, comments, perspectives, and reviews. The aim of npj Artificial Intelligence is to establish itself as a premier journal that publishes transformative research in artificial intelligence, fostering an interdisciplinary community that drives innovation and addresses the ethical and societal implications of AI technologies. We seek to bridge the gap between theoretical advancements and practical applications, emphasizing the significant impact of AI across various scientific disciplines, society, and industry. The journal will spotlight groundbreaking studies that reframe classic research challenges and propose novel solutions within the AI paradigm, inspiring diverse explorations that pave the way for future AI-driven scientific inquiry. By cultivating a vibrant and inclusive platform, we aim to showcase cutting-edge progress in AI that meets the evolving needs of the scientific community while encouraging contributions that go beyond incremental improvements in existing AI models.

npj Artificial Intelligence welcomes submissions that align with the following scopes: 1. Transformative AI Research - Original studies that develop novel algorithms, methodologies, or frameworks that significantly advance the field of artificial intelligence. 2. Interdisciplinary Applications - Research that explores the application of AI across diverse scientific disciplines, including but not limited to biology, medicine, environmental science, social sciences, and engineering. 3. Ethical and Societal Implications - Critical analyses addressing the ethical challenges, societal impacts, and governance of AI technologies, including issues of bias, transparency, accountability, and privacy. 4. Bridging Theory and Practice - Studies that demonstrate the practical application of theoretical advancements in AI, showcasing real-world implementations and case studies that highlight AI's impact on industry and society. 5. Reframing Research Challenges - Innovative approaches that redefine classic research problems within the AI

#### Is it Human?

Our artificial intelligence detection software tells you if what you have reads like it is written by a human or if it sounds robotic. The AI Detector tries to forecast if your content is written by an LLM, or humanly written. With robotic-sounding content placing you in a position of inauthenticity, the need for a ChatGPT Detector is higher than ever.

#### Human Probability Results

😊 READS LIKE AI!



### 3.1.5. Winston AI

#### Human Score

0%

Winston has detected the text as 0% human. It is highly probable that an AI text generation tool was used. [How to interpret our results.](#)

#### Plagiarism

!

This feature is available only for advanced and elite plans. Please upgrade your account.

[Upgrade now](#)

#### Readability score

4

This text has a readability score of 4/100 and has a U.S. school Professional level, which means it is extremely difficult to read and is best understood by university graduates. [How to interpret our results.](#)

#### AI detection

[AI prediction map](#)

The AI prediction map will scan your content by smaller portions to indicate which portions sounds more synthetic, however, since it scans smaller portions, it is less accurate than our overall score which scans your entire content for a more precise score. [How to interpret our results.](#)

🔴 Likely AI generated 🟡 Possibly AI generated 🟢 Unlikely AI generated

npj Artificial Intelligence considers research that explores all aspects of Artificial Intelligence research and development including application and implementation of these technologies. The journal considers original research articles, brief communications, comments, perspectives, and reviews.

The aim of npj Artificial Intelligence is to establish itself as a premier journal that publishes transformative research in artificial intelligence, fostering an interdisciplinary community that drives innovation and addresses the ethical and societal implications of AI technologies. We seek to bridge the gap between theoretical advancements and practical applications, emphasizing the significant impact of AI across various scientific disciplines, society, and industry. The journal will spotlight groundbreaking studies that reframe classic research challenges and propose novel solutions within the AI paradigm, inspiring diverse explorations that pave the way for future AI-driven scientific inquiry. By cultivating a vibrant and inclusive platform, we aim to showcase cutting-edge progress in AI that meets the evolving needs of the scientific community while encouraging contributions that go beyond incremental improvements in existing AI models.

npj Artificial Intelligence welcomes submissions that align with the following scopes:

1. Transformative AI Research  
- Original studies that develop novel algorithms, methodologies, or frameworks that significantly advance the field of artificial intelligence.
2. Interdisciplinary Applications  
- Research that explores the application of AI across diverse scientific disciplines, including but not limited to biology, medicine, environmental science, social sciences, and engineering.
3. Ethical and Societal Implications

#### Report

[Generate report](#)

#### Text statistics

Human score: 0%

Number of words: 357

Number of characters: 2884

Number of sentences: 20

Reading time: 2 minutes

### 3.1.6. Crossplag

AI Content Detector

**AI Content Detector (Updated version)**

Use our AI Content Detector for free to check if the text is AI-generated - now with higher accuracy!

**Text box**

npj Artificial Intelligence considers research that explores all aspects of Artificial Intelligence research and development including application and implementation of these technologies. The journal considers original research articles, brief communications, comments, perspectives, and reviews.

The aim of npj Artificial Intelligence is to establish itself as a premier journal that publishes transformative research in artificial intelligence, fostering an interdisciplinary community that drives innovation and addresses the ethical and societal implications of AI technologies. We seek to bridge the gap between theoretical advancements and practical applications, emphasizing the significant impact of AI across various scientific disciplines, society, and industry. The journal will spotlight groundbreaking studies that reframe classic research challenges and propose novel solutions within the AI paradigm, inspiring diverse explorations that pave the way for future AI-driven scientific inquiry. By cultivating a vibrant and inclusive platform, we aim to showcase cutting-edge progress in AI that meets the evolving needs of the scientific community while encouraging contributions that go beyond incremental improvements in existing AI models.

369/3000

**Check**

**Results**

**AI Content Index<sup>®</sup>**



0% 25% 50% 75% 100%

**This text is mainly written by an AI.**

Are you satisfied with the results? [👍](#) [👎](#)

**Disclaimer**

- The AI Content Detector v2.0 is based to check on a deeper level to give more precise results.
- The result might take a bit longer to display as the text is checked more thoroughly.
- The AI Content Detector v2.0 is now able to analyze up to 3,000 words (compared to the 1,000 words of the first version).
- At this point, the AI Content Detector only works for the English language.

## 3.2. Nature Index [24]

### 3.2.1. Undetectable AI

0% AI-generated

### 3.2.2. Zero GPT.com

**Your Text is AI/GPT Generated**



**100% AI GPT\***

The idea of artificial intelligence (AI) — systems so advanced they can mimic or outperform human cognition — first came to prominence in 1950, when British computer scientist Alan Turing proposed an 'imitation game' to assess whether a computer could fool humans into thinking they were communicating with another human. Soon after, researchers at Princeton University in New Jersey built MADALINE, the first artificial neural network applied to a real-world problem. Their system, modelled on the brain and nervous system, learnt to solve a maze through trial-and-error.

Since then, the rise of AI has been enabled by exponentially faster and more powerful computers and large, complex data sets. Applications such as machine learning, whereby a system identifies patterns in large sets of data, have demonstrated the potential for AI to be practical and profitable.

Today, AI forms the basis of computer systems handling tasks such as voice recognition and translation on smartphones, piloting driverless cars, and controlling robots that automate chores in homes and factories. In research, AI is being used in a growing number of applications, such as processing the enormous amounts of data that underpin fields including astronomy and genomics, producing climate models and weather forecasts, and identifying signs of disease in medical imaging.

**Make your text human**

So it becomes undetectable

■ Highlighted text is suspected to be most likely generated by AI\*

 **Export to PDF**



### 3.2.3. ZeroGPT.net

🔥 Your text is most likely the work of a human author.



85.30%

is written by a human



14.70%

is generated by an AI/GPT

[Bookmark This Tool](#)

[Detect new text](#)



[TRY](#)

The idea of artificial intelligence (AI) — systems so advanced they can mimic or outperform human cognition — first came to prominence in 1950, when British computer scientist Alan Turing proposed an 'imitation game' to assess whether a computer could fool humans into thinking they were communicating with another human. Soon after, researchers at Princeton University in New Jersey built MADALINE, the first artificial neural network applied to a real-world problem. Their system, modelled on the brain and nervous system, learnt to solve a maze through trial-and-error.

Since then, the rise of AI has been enabled by exponentially faster and more powerful computers and large, complex data sets. Applications such as machine learning, whereby a system identifies patterns in large sets of data, have demonstrated the potential for AI to be practical and profitable.

Today, AI forms the basis of computer systems handling tasks such as voice recognition and translation on smartphones, piloting driverless cars, and controlling robots that automate chores in homes and factories. In research, AI is being used in a growing number of applications, such as processing the enormous amounts of data that underpin fields including astronomy and genomics, producing climate models and weather forecasts, and identifying signs of disease in medical imaging.

[Detect new text](#)

### 3.2.4. Brandwell.ai

The idea of artificial intelligence (AI) — systems so advanced they can mimic or outperform human cognition — first came to prominence in 1950, when British computer scientist Alan Turing proposed an 'imitation game' to assess whether a computer could fool humans into thinking they were communicating with another human. Soon after, researchers at Princeton University in New Jersey built MADALINE, the first artificial neural network applied to a real-world problem. Their system, modelled on the brain and nervous system, learnt to solve a maze through trial-and-error.

Since then, the rise of AI has been enabled by exponentially faster and more powerful computers and large, complex data sets. Applications such as machine learning, whereby a system identifies patterns in large sets of data, have demonstrated the potential for AI to be practical and profitable.

Today, AI forms the basis of computer systems handling tasks such as voice recognition and translation on smartphones, piloting driverless cars, and controlling robots that automate chores in homes and factories. In research, AI is being used in a growing number of applications, such as processing the enormous amounts of data that underpin fields including astronomy and genomics, producing climate models and weather forecasts, and identifying signs of disease in medical imaging.

1352 / 2500 Characters

#### Is it Human?

Our artificial intelligence detection software tells you if what you have reads like it is written by a human or if it sounds robotic. The AI Detector tries to forecast if your content is written by an LLM, or humanly written. With robotic-sounding content placing you in a position of inauthenticity, the need for a ChatGPT Detector is higher than ever.

#### Human Probability Results

☹️ READS LIKE AI!!

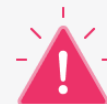

### 3.2.5. Winston AI

Text scan

Results

Human Score

0%

Winston has detected the text as 0% human. It is highly probable that an AI text generation tool was used. [How to interpret our results.](#)

Plagiarism

!

This feature is available only for advanced and elite plans. Please upgrade your account.

Upgrade now

Readability score

19

This text has a **readability score of 19/100** and has a **U.S. school College graduate level**, which means it is very difficult to read and is best understood by university graduates. [How to interpret our results.](#)

AI detection

AI prediction map

The AI prediction map will scan your content by smaller portions to indicate which portions sounds more synthetic, however, since it scans smaller portions, it is less accurate than our overall score which scans your entire content for a more precise score. [How to interpret our results.](#)

Likely AI generated

Possibly AI generated

Unlikely AI generated

The idea of artificial intelligence (AI) — systems so advanced they can mimic or outperform human cognition — first came to prominence in 1950, when British computer scientist Alan Turing proposed an 'imitation game' to assess whether a computer could fool humans into thinking they were communicating with another human. Soon after, researchers at Princeton University in New Jersey built MADALINE, the first artificial neural network applied to a real-world problem. Their system, modelled on the brain and nervous system, learnt to solve a maze through trial-and-error.

Since then, the rise of AI has been enabled by exponentially faster and more powerful computers and large, complex data sets. Applications such as machine learning, whereby a system identifies patterns in large sets of data, have demonstrated the potential for AI to be practical and profitable.

Today, AI forms the basis of computer systems handling tasks such as voice recognition and translation on smartphones, piloting driverless cars, and controlling robots that automate chores in homes and factories. In research, AI is being used in a growing number of applications, such as processing the enormous amounts of data that underpin fields including astronomy and genomics, producing climate models and weather forecasts, and identifying signs of disease in medical imaging.

Report

Generate report

Text statistics

Human score: 0%

Number of words: 203

Number of characters: 1354

Number of sentences: 7

Reading time: 1 minutes

62

### 3.2.6. Crossplag

AI Content Detector

AI Content Detector (Updated version)

Use our AI Content Detector for free to check if the text is AI-generated - now with higher accuracy!

Text box

The idea of artificial intelligence (AI) — systems so advanced they can mimic or outperform human cognition — first came to prominence in 1950, when British computer scientist Alan Turing proposed an 'imitation game' to assess whether a computer could fool humans into thinking they were communicating with another human. Soon after, researchers at Princeton University in New Jersey built MADALINE, the first artificial neural network applied to a real-world problem. Their system, modelled on the brain and nervous system, learnt to solve a maze through trial-and-error.

Since then, the rise of AI has been enabled by exponentially faster and more powerful computers and large, complex data sets. Applications such as machine learning, whereby a system identifies patterns in large sets of data, have demonstrated the potential for AI to be practical and profitable.

Today, AI forms the basis of computer systems handling tasks such as voice recognition and translation on smartphones, piloting driverless cars, and controlling robots that automate chores in homes and factories. In research, AI is being used in a growing number of applications, such as processing the enormous amounts of data that underpin fields including astronomy and

204/3000

Check

Results

AI Content Index<sup>®</sup>

71%

HumanMidAI

0%25%50%75%100%

This text is mainly written by an AI.

Are you satisfied with the results?  

Disclaimer

- The AI Content Detector v2.0 is based to check on a deeper level to give more precise results
- The result might take a bit longer to display as the text is checked more thoroughly
- The AI Content Detector v2.0 is now able to analyze up to 3,000 words (compared to the 1,000 words of the first version)
- At this point, the AI Content Detector only works for the English language.

## 3.3. Nature news Q & A [25]

### 3.3.1. Undetectable AI

0% AI-generated

### 3.3.2. Zero GPT.com

Your Text is AI/GPT Generated

66.31%  
AI GPT\*

Mpox has spread to 15 African countries in 2024, six of which had never seen a single case of the disease, leaving health officials scrambling to contain the continent's deadliest mpox surge to date. But they finally have a new tool to help — vaccines — which have not previously been available in Africa despite mpox being detected on the continent decades ago.

Mpox vaccines used in wealthy nations such as Germany and the United States did not materialize in Africa, even during a global outbreak of the disease in 2022, says Nicaise Ndembé, a virologist at the Africa Centres for Disease Control and Prevention in Addis Ababa. This year, however, doses have begun to arrive, after the World Health Organization declared mpox a global public-health emergency for the second time in history.

On 17 September, Rwandan health officials began administering jabs to those at high risk of infection; the Democratic Republic of the Congo (DRC), which has been the African country hardest hit by the disease, will follow suit on 5 October; and Nigeria is set to start its own vaccinations in the next two weeks.

 Highlighted text is suspected to be most likely generated by AI\*

 Export to PDF

### 3.3.3. ZeroGPT.net

 There's a probability that your text is human-written, yet it may include segments generated by GPT.

We have great confidence that this text is fully **Human**



58.85%

is written by a human



41.15%

is generated by an AI/GPT

[Bookmark This Tool](#)

[Detect new text](#)

 \*The highlighted text appears to have been generated by an AI system.



©

Mpox has spread to 15 African countries this year, 6 of which had never seen a single case of the disease, leaving health officials scrambling to contain the continent's deadliest mpox surge so far. But they finally have a new tool to help: vaccines, which were previously unavailable in Africa despite mpox first being detected on the continent decades ago.

Mpox vaccines, which have been used in wealthy nations such as Germany and the United States, did not materialize in Africa during earlier outbreaks, even the global one in 2022, says Nicaise Ndembi, a virologist at the Africa Centres for Disease Control and Prevention (Africa CDC) in Addis Ababa. This year, however, countries have pledged doses, and the jabs have begun to arrive, after the World Health Organization declared mpox a global public-health emergency for the second time in history.

On 17 September, Rwandan health officials began administering jabs to those at high risk of infection; the Democratic Republic of the Congo (DRC), which has been the country hit hardest by the disease, will follow suit on 5 October; and Nigeria is set to start its own vaccinations in the next two weeks.

[Detect new text](#)

### 3.3.4. Brandwell.ai

0% AI-generated

### 3.3.5. Winston AI

0% AI-generated

### 3.3.6. Crossplag

AI Content Detector

AI Content Detector (Updated version)

Use our AI Content Detector for free to check if the text is AI-generated - now with higher accuracy!

Text box

Mpox has spread to 15 African countries this year, 6 of which had never seen a single case of the disease, leaving health officials scrambling to contain the continent's deadliest mpox surge so far. But they finally have a new tool to help: vaccines, which were previously unavailable in Africa despite mpox first being detected on the continent decades ago.

Mpox vaccines, which have been used in wealthy nations such as Germany and the United States, did not materialize in Africa during earlier outbreaks, even the global one in 2022, says Nicaise Ndembu, a virologist at the Africa Centres for Disease Control and Prevention (Africa CDC) in Addis Ababa. This year, however, countries have pledged doses, and the jabs have begun to arrive, after the World Health Organization declared mpox a global public-health emergency for the second time in history.

On 17 September, Rwandan health officials began administering jabs to those at high risk of infection; the Democratic Republic of the Congo (DRC), which has been the country hit hardest by the disease, will follow suit on 5 October; and Nigeria is set to start its own vaccinations in the next two weeks.

191/3000

Check

Results

AI Content Index<sup>®</sup>

Human

Mix

AI

0% 25% 50% 75% 100%

This text is mainly written by an AI.

Are you satisfied with the results?  

Disclaimer

- The AI Content Detector v2.0 is based to check on a deeper level to give more precise results
- The result might take a bit longer to display as the text is checked more thoroughly
- The AI Content Detector v2.0 is now able to analyze up to 3,000 words (compared to the 1,000 words of the first version)
- At this point, the AI Content Detector only works for the English language.

## 3.4. Nature portfolio [26]

### 3.4.1. Undetectable AI

0% AI-generated

65

### 3.4.2. Zero GPT.com

Your Text is AI/GPT Generated

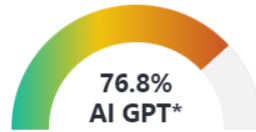

A dedicated fund has been made available to enable authors from many lower income countries (currently those classified by the World Bank as low-income (LIC) or lower-middle-income economies (LMICs)) to publish their primary research OA in Nature and the Nature research journals.

It is a specific provision to support a subset of authors and only applies to our highly selective Nature Portfolio hybrid or transformative journals as they transition to OA and will be reviewed at the end of 2024.

This applies to the following titles: Nature; Nature Aging; Nature Astronomy; Nature Biomedical Engineering; Nature Biotechnology; Nature Cancer; Nature Cardiovascular Research; Nature Catalysis; Nature Cell Biology; Nature Chemical Biology; Nature Chemistry; Nature Climate Change; Nature Computational Science; Nature Ecology & Evolution; Nature Electronics; Nature Energy; Nature Food; Nature Genetics; Nature Geoscience; Nature Human Behaviour; Nature Immunology; Nature Machine Intelligence; Nature Materials; Nature Medicine; Nature Mental Health; Nature Metabolism; Nature Methods; Nature Microbiology; Nature Nanotechnology; Nature Neuroscience; Nature Photonics; Nature Physics; Nature Plants; Nature Structural & Molecular Biology; Nature Sustainability; Nature Synthesis and Nature Water; Nature Chemical Engineering and Nature Cities.

Highlighted text is suspected to be most likely generated by AI\*

 [Export to PDF](#)

### 3.4.3. ZeroGPT.net

0% AI-generated

### 3.4.4. Brandwell.ai

0% AI-generated

### 3.4.5. Winston AI

0% AI-generated

### 3.4.6. Crossplag

0% AI-generated

## 4. Government Website

### 4.1. Martin Luther King Jr.'s speech "I Have a Dream." [27]

#### 4.1.1. Undetectable AI

0% AI-generated

#### 4.1.2. Zero GPT.com

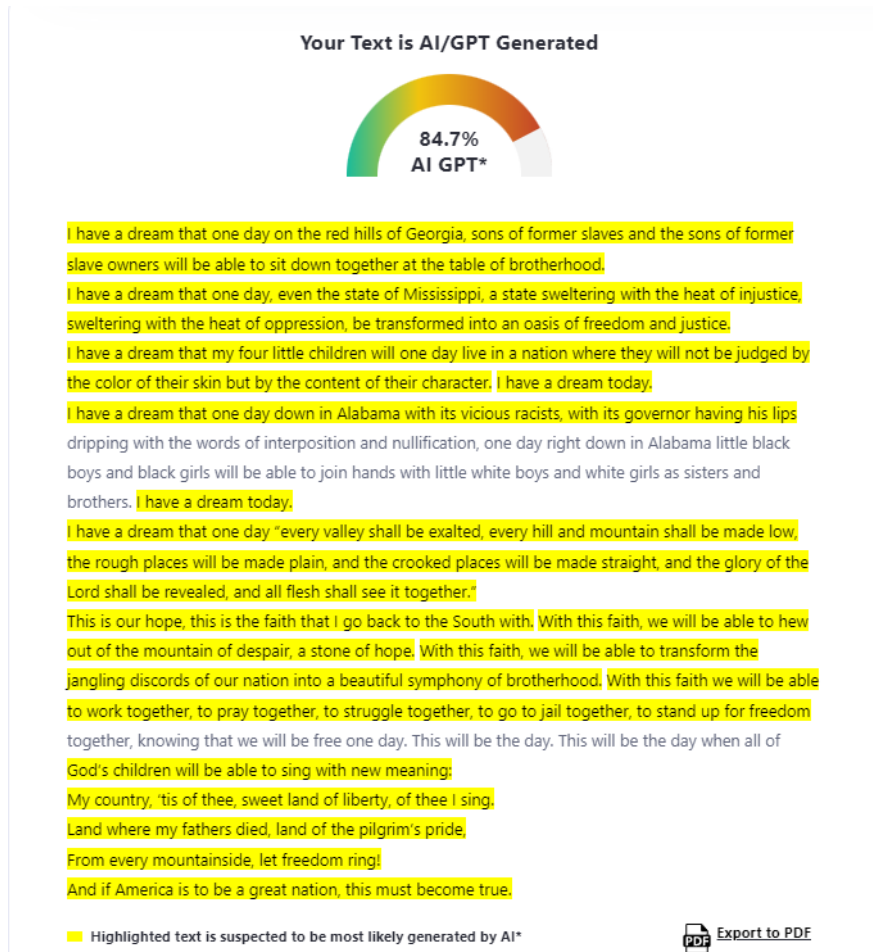

### 4.1.3. ZeroGPT.net

 The majority of your content seems to be generated by GPT.



15.60%

is written by a human



84.40%

is generated by an AI/GPT

[Bookmark This Tool](#)

[Detect new text](#)

 \*The highlighted text appears to have been generated by an AI system.







I have a dream that one day on the red hills of Georgia, sons of former slaves and the sons of former  
slave owners will be able to sit down together at the table of brotherhood.

I have a dream that one day, even the state of Mississippi, a state sweltering with the heat of injustice,  
sweltering with the heat of oppression, be transformed into an oasis of freedom and justice.

I have a dream that my four little children will one day live in a nation where they will not be judged by  
the color of their skin but by the content of their character. I have a dream today.

I have a dream that one day down in Alabama with its vicious racists, with its governor having his lips  
dripping with the words of interposition and nullification, one day right down in Alabama little black  
boys and black girls will be able to join hands with little white boys and white girls as sisters and  
brothers. I have a dream today.

I have a dream that one day "every valley shall be exalted, every hill and mountain shall be made low,  
the rough places will be made plain, and the crooked places will be made straight, and the glory of the  
Lord shall be revealed, and all flesh shall see it together."

This is our hope, this is the faith that I go back to the South with. With this faith, we will be able to hew  
out of the mountain of despair, a stone of hope. With this faith, we will be able to transform the  
jangling discords of our nation into a beautiful symphony of brotherhood. With this faith we will be able  
to work together, to pray together, to struggle together, to go to jail together, to stand up for freedom  
together, knowing that we will be free one day. This will be the day. This will be the day when all of  
God's children will be able to sing with new meaning:

My country, 'tis of thee, sweet land of liberty, of thee I sing.

[Detect new text](#)



#### 4.1.4. Brandwell.ai

0% AI-generated

#### 4.1.5. Winston AI

0% AI-generated

#### 4.1.6. Crossplag

0% AI-generated

### 4.2. Government of Canada [28]

#### 4.2.1. Undetectable AI

0% AI-generated

#### 4.2.2. Zero GPT.com

Your Text is AI/GPT Generated

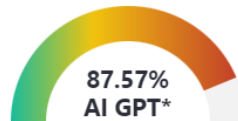

Federal research funding agencies release Tri-agency Research Training Strategy

The three federal research funding agencies—the Canadian Institutes of Health Research (CIHR), Natural Sciences and Engineering Research Council of Canada (NSERC) and Social Sciences and Humanities Research Council (SSHRC)—have released their Tri-agency Research Training Strategy.

As part of its priority to advance research training, the Canada Research Coordinating Committee (CRCC) tasked the three agencies with developing this research training strategy. Its aim is to ensure the suite of scholarships and fellowships the agencies deliver is equitable, inclusive, accessible and effective . The strategy will help support and prepare a diverse population of undergraduate and graduate students and postdoctoral researchers for careers requiring strong research skills in all sectors of society.

Building on the guidance provided by the CRCC, the evidence and data collected as part of the strategy's development, and feedback received from the community, the three funding agencies have identified five themes in research training, and are committed to exploring related actions to each, as outlined in the strategy.

■ Highlighted text is suspected to be most likely generated by AI\*

 [Export to PDF](#)

### 4.2.3. ZeroGPT.net

 There's a probability that your text is human-written, yet it may include segments generated by GPT.

---



62.80%

is written by a human



37.20%

is generated by an AI/GPT

---

[Bookmark This Tool](#)

[Detect new text](#)

---

 \*The highlighted text appears to have been generated by an AI system.

**Ditch the gas pump.**  
Discover our growing selection  
of affordable electric vehicles.



**Hertz**  
CAR SALES

---

The three federal research funding agencies—the Canadian Institutes of Health Research (CIHR), Natural Sciences and Engineering Research Council of Canada (NSERC) and Social Sciences and Humanities Research Council (SSHRC)—have released their Tri-agency Research Training Strategy.

As part of its priority to advance research training, the Canada Research Coordinating Committee (CRCC) tasked the three agencies with developing this research training strategy. Its aim is to ensure the suite of scholarships and fellowships the agencies deliver is equitable, inclusive, accessible and effective. The strategy will help support and prepare a diverse population of undergraduate and graduate students and postdoctoral researchers for careers requiring strong research skills in all sectors of society.

Building on the guidance provided by the CRCC, the evidence and data collected as part of the strategy's development, and feedback received from the community, the three funding agencies have identified five themes in research training, and are committed to exploring related actions to each, as outlined in the strategy.

[Detect new text](#)

## 4.2.4. Brandwell.ai

The three federal research funding agencies—the Canadian Institutes of Health Research (CIHR), Natural Sciences and Engineering Research Council of Canada (NSERC) and Social Sciences and Humanities Research Council (SSHRC)—have released their Tri-agency Research Training Strategy.

This content reads as if it is human-written. As part of its priority to advance research training, the Canada Research Coordinating Committee (CRCC) tasked the three agencies with developing this research training strategy. This content reads as if it is human-written. Its aim is to ensure the suite of scholarships and fellowships the agencies deliver is equitable, inclusive, accessible and effective. The strategy will help support and prepare a diverse population of undergraduate and graduate students and postdoctoral researchers for careers requiring strong research skills in all sectors of society.

This content reads as if it is human-written. Building on the guidance provided by the CRCC, the evidence and data collected as part of the strategy's development, and feedback received from the community, the three funding agencies have identified five themes in research training, and are committed to exploring related actions to each, as outlined in the strategy.

1122 / 2500 Characters

### Is it Human?

Our artificial intelligence detection software tells you if what you have reads like it is written by a human or if it sounds robotic. The AI Detector tries to forecast if your content is written by an LLM, or humanly written. With robotic-sounding content placing you in a position of inauthenticity, the need for a ChatGPT Detector is higher than ever.

#### Human Probability Results

😞 HARD TO TELL!

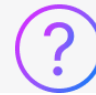

## 4.2.5. Winston AI

0% AI-generated

## 4.2.6. Crossplag

AI Content Detector

AI Content Detector (Updated version)

Use our AI Content Detector for free to check if the text is AI-generated - now with higher accuracy!

Text box

Federal research funding agencies release Tri-agency Research Training Strategy  
The three federal research funding agencies—the Canadian Institutes of Health Research (CIHR), Natural Sciences and Engineering Research Council of Canada (NSERC) and Social Sciences and Humanities Research Council (SSHRC)—have released their Tri-agency Research Training Strategy.  
  
As part of its priority to advance research training, the Canada Research Coordinating Committee (CRCC) tasked the three agencies with developing this research training strategy. Its aim is to ensure the suite of scholarships and fellowships the agencies deliver is equitable, inclusive, accessible and effective. The strategy will help support and prepare a diverse population of undergraduate and graduate students and postdoctoral researchers for careers requiring strong research skills in all sectors of society.  
  
Building on the guidance provided by the CRCC, the evidence and data collected as part of the strategy's development, and feedback received from the community, the three funding agencies have identified five themes in research training, and are committed to exploring related actions to

166/3000

Check

Results

AI Content Index®

60%

Human

Mix

AI

0% 25% 50% 75% 100%

This text is co-written by both a human and an AI

Are you satisfied with the results? 🗨️

Disclaimer

- The AI Content Detector v2.0 is based to check on a deeper level to give more precise results
- The result might take a bit longer to display as the text is checked more thoroughly
- The AI Content Detector v2.0 is now able to analyze up to 3,000 words (compared to the 1,000 words of the first version)
- At this point, the AI Content Detector only works for the English language.

## 5. Media Outlets

### 5.1. BBC Sport

#### 5.1.1. Undetectable AI

0% AI-generated

#### 5.1.2. Zero GPT.com

**Your Text is AI/GPT Generated**



100%  
AI GPT\*

What is the format for the Women's T20 World Cup 2024?

There are 10 participating teams and they are split into two groups of five - Group A and B.

The top six teams from last year's tournament automatically qualified for this year's (Australia, England, India, New Zealand, South Africa, West Indies) as well as the original hosts (Bangladesh, more on that below).

Pakistan also secured a place as the next team in the International Cricket Council (ICC) rankings.

The final two places were determined by the ICC 2024 Women's World Cup Qualifier, which took place in April and May. Like the actual tournament, the 10 participating teams were split into two groups of five and the two finalists, Scotland and Sri Lanka, qualified.

The group stage will be a round-robin format, with each team playing the other four teams in their group once. The top two teams from each group will then advance to the semi-finals.

If India reach the last four, they will play in the first semi-final in Dubai on 17 October, regardless of whether they finish first or second in Group A.

**Make your text human**  
So it becomes undetectable

■ Highlighted text is suspected to be most likely generated by AI\*

 [Export to PDF](#)

### 5.1.3. ZeroGPT.net

 Your content appears to be crafted by GPT technology.

0.00%

is written by a human

100.00%

is generated by an AI/GPT

[Bookmark This Tool](#)[Detect new text](#)

 \*The highlighted text appears to have been generated by an AI system.

What is the format for the Women's T20 World Cup 2024?

There are 10 participating teams and they are split into two groups of five - Group A and B.

The top six teams from last year's tournament automatically qualified for this year's (Australia, England, India, New Zealand, South Africa, West Indies) as well as the original hosts (Bangladesh, more on that below).

Pakistan also secured a place as the next team in the International Cricket Council (ICC) rankings.

The final two places were determined by the ICC 2024 Women's World Cup Qualifier, which took place in April and May. Like the actual tournament, the 10 participating teams were split into two groups of five and the two finalists, Scotland and Sri Lanka, qualified.

The group stage will be a round-robin format, with each team playing the other four teams in their group once. The top two teams from each group will then advance to the semi-finals.

If India reach the last four, they will play in the first semi-final in Dubai on 17 October, regardless of whether they finish first or second in Group A.

[Detect new text](#)

### 5.1.4. Brandwell.ai

0% AI-generated

## 5.1.5. Winston AI

0% AI-generated

## 5.1.6. Crossplag

### AI Content Detector (Updated version)

Use our AI Content Detector for free to check if the text is AI-generated - now with higher accuracy!

Text box

The top six teams from last year's tournament automatically qualified for this year's (Australia, England, India, New Zealand, South Africa, West Indies) as well as the original hosts (Bangladesh, more on that below).

Pakistan also secured a place as the next team in the International Cricket Council (ICC) rankings.

The final two places were determined by the ICC 2024 Women's World Cup Qualifier, which took place in April and May. Like the actual tournament, the 10 participating teams were split into two groups of five and the two finalists, Scotland and Sri Lanka, qualified.

The group stage will be a round-robin format, with each team playing the other four teams in their group once. The top two teams from each group will then advance to the semi-finals.

If India reach the last four, they will play in the first semi-final in Dubai on 17 October, regardless of whether they finish first or second in Group A.

180/3000

Check

Results

#### AI Content Index<sup>®</sup>

Human

Mix

AI

0%25%50%75%100%

This text is mainly written by an AI.

Are you satisfied with the results? [👍](#) [👎](#)

#### Disclaimer

- The AI Content Detector v2.0 is based to check on a deeper level to give more precise results
- The result might take a bit longer to display as the text is checked more thoroughly
- The AI Content Detector v2.0 is now able to analyze up to 3,000 words (compared to the 1,000 words of the first version)
- At this point, the AI Content Detector only works for the English language.

## 5.2. BBC News

### 5.2.1. Undetectable AI

[ud] UNDETECTABLE AI

🇺🇸 EN

AI Detector and Humanizer

Business Solutions

Documents

Pricing SALE

API

Earn

READABILITY

University

PURPOSE

General Writing

831/15000 CHARS = 136 WORDS

Scientists are hoping that access to more than 1.6 million brain scans collected from patients across Scotland could help predict a person's risk of dementia.

A team of 20 researchers from the universities of Edinburgh and Dundee have been given unprecedented permission to view a huge number of anonymous scans gathered from across the Scottish population over a decade.

It is the first time scientists in the UK have had access to such large volumes of valuable data.

They will use artificial intelligence (AI) to analyse the scans to see if there are patterns or signs of dementia.

⚙️ WAITING FOR YOUR INPUT

MORE READABLE ⓘ

BALANCED ⓘ

MORE HUMAN ⓘ

☒ I AGREE TO THE TERMS OF SERVICE (NO ACADEMIC MISCONDUCT)

CLEAR

CHECK FOR AI

HUMANIZE

⚠️ Your content is detected as written by AI ⚠️

AI DETECTION LIKELIHOOD

⚠️ GPTZERO ⚠️ OPENAI ⚠️ WRITER ⚠️ CROSSPLAG ⚠️ COPYLEAKS ⚠️ SAPLING ⚠️ CONTENTATSCALE ⚠️ ZEROGPT

KEY: 100% HUMAN 50% HUMAN 0% HUMAN

### 5.2.2. Zero GPT.com

Your Text is AI/GPT Generated

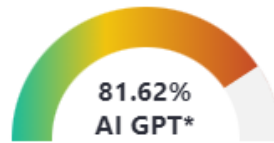

Scientists are hoping that access to more than 1.6 million brain scans collected from patients across Scotland could help predict a person's risk of dementia.

A team of 20 researchers from the universities of Edinburgh and Dundee have been given unprecedented permission to view a huge number of anonymous scans gathered from across the Scottish population over a decade.

It is the first time scientists in the UK have had access to such large volumes of valuable data.

They will use artificial intelligence (AI) to analyse the scans to see if there are patterns or signs of dementia.

Dementia is characterised by the build-up of different types of protein in the brain, which damages brain tissue and leads to cognitive decline.

Molecular and cellular changes to the brain usually begin many years before any symptoms occur.

■ Highlighted text is suspected to be most likely generated by AI\*

 [Export to PDF](#)

### 5.2.3. ZeroGPT.net

0.7% AI-generated

## 5.2.4. Brandwell.ai

Scientists are hoping that access to more than 1.6 million brain scans collected from patients across Scotland could help predict a person's risk of dementia.

A team of 20 researchers from the universities of Edinburgh and Dundee have been given unprecedented permission to view a huge number of anonymous scans gathered from across the Scottish population over a decade.

It is the first time scientists in the UK have had access to such large volumes of valuable data.

They will use artificial intelligence (AI) to analyse the scans to see if there are patterns or signs of dementia.

Dementia is characterised by the build-up of different types of protein in the brain, which damages brain tissue and leads to cognitive decline.

Molecular and cellular changes to the brain usually begin many years before any symptoms occur.

825 / 2500 Characters

### Is it Human?

Our artificial intelligence detection software tells you if what you have reads like it is written by a human or if it sounds robotic. The AI Detector tries to forecast if your content is written by an LLM, or humanly written. With robotic-sounding content placing you in a position of inauthenticity, the need for a ChatGPT Detector is higher than ever.

#### Human Probability Results

😞 HARD TO TELL!

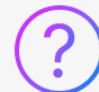

## 5.2.5. Winston AI

### Human Score

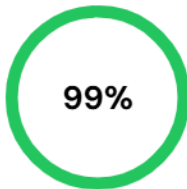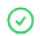

Winston has detected the text as 99% human. Our scan was unable to detect material use of AI text generation tools. [How to interpret our results.](#)

### Plagiarism

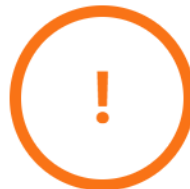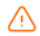

This feature is available only for advanced and elite plans. Please upgrade your account.

[Upgrade now](#)

### Readability score

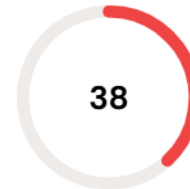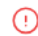

This text has a **readability score of 38/100** and has a **U.S. school College level**, which means it is difficult to read. [How to interpret our results.](#)

### AI detection

#### AI prediction map

The AI prediction map will scan your content by smaller portions to indicate which portions sounds more synthetic, however, since it scans smaller portions, it is less accurate than our overall score which scans your entire content for a more precise score. [How to interpret our results.](#)

■ Likely AI generated ■ Possibly AI generated ■ Unlikely AI generated

Scientists are hoping that access to more than 1.6 million brain scans collected from patients across Scotland could help predict a person's risk of dementia.

A team of 20 researchers from the universities of Edinburgh and Dundee have been given unprecedented permission to view a huge number of anonymous scans gathered from across the Scottish population over a decade.

It is the first time scientists in the UK have had access to such large volumes of valuable data.

They will use artificial intelligence (AI) to analyse the scans to see if there are patterns or signs of dementia. Dementia is characterised by the build-up of different types of protein in the brain, which damages brain tissue and leads to cognitive decline.

Molecular and cellular changes to the brain usually begin many years before any symptoms occur.

#### Report

[Generate report](#)

#### Text statistics

**Human score:** 99%

**Number of words:** 135

**Number of characters:** 829

**Number of sentences:** 6

**Reading time:** 1 minutes



## 5.2.6. Crossplag

AI Content Detector

AI Content Detector (Updated version)

Use our AI Content Detector for free to check if the text is AI-generated - now with higher accuracy!

Text box

Scientists are hoping that access to more than 1.6 million brain scans collected from patients across Scotland could help predict a person's risk of dementia.

A team of 20 researchers from the universities of Edinburgh and Dundee have been given unprecedented permission to view a huge number of anonymous scans gathered from across the Scottish population over a decade.

It is the first time scientists in the UK have had access to such large volumes of valuable data.

They will use artificial intelligence (AI) to analyse the scans to see if there are patterns or signs of dementia.

Dementia is characterised by the build-up of different types of protein in the brain, which damages brain tissue and leads to cognitive decline.

Molecular and cellular changes to the brain usually begin many years before any symptoms occur.

131/3000

Check

Results

AI Content Index®

Human

Mix

AI

0%25%50%75%100%

This text is mainly written by an AI.

Are you satisfied with the results?  

Disclaimer

- The AI Content Detector v2.0 is based to check on a deeper level to give more precise results
- The result might take a bit longer to display as the text is checked more thoroughly
- The AI Content Detector v2.0 is now able to analyze up to 3,000 words (compared to the 1,000 words of the first version)
- At this point, the AI Content Detector only works for the English language.

## 5.3. US News

### 5.3.1. Undetectable AI

0% AI-generated

77

### 5.3.2. Zero GPT.com

Your Text is AI/GPT Generated

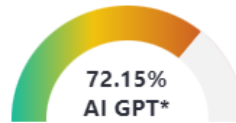

If you have severe heel pain, the right pair of shoes may help ease it. Plantar fasciitis causes inflammation and intense pain in the plantar fascia, a thick band of tissue that runs under the foot. This condition can be caused or exacerbated by unsupportive footwear, like flip flops, that don't absorb impact underneath the heel. The result is heel pain that can stop you from walking, running, and enjoying life.

Plantar fasciitis pain can be debilitating, but choosing the right footwear can help you maintain mobility while your feet heal. I am a runner and I used to experience severe, long-lasting plantar fasciitis caused by poor footwear. My quest to find the right footwear to ease my pain included seeing podiatrists, and testing and comparing the recommended shoes for plantar fasciitis to find which works the best.

In addition to my personal history of choosing the right shoes to help with plantar fasciitis pain, I interviewed podiatrists on the types of shoes people with this condition should wear and avoid. This input helped to compile the list of reviews below in which the HOKA Bondi 8 emerged as our best overall pick. This highly cushioned shoe supports the arch, and absorbs impact under the heel. It also has a rear crash pad that enables a natural gait. These and other pain-alleviating attributes make the HOKA Bondi 8 one of the best shoes available for plantar fasciitis.

Highlighted text is suspected to be most likely generated by AI\*

 [Export to PDF](#)

### 5.3.3. ZeroGPT.net

0.7% AI-generated

### 5.3.4. Brandwell.ai

0% AI-generated

### 5.3.5. Winston AI

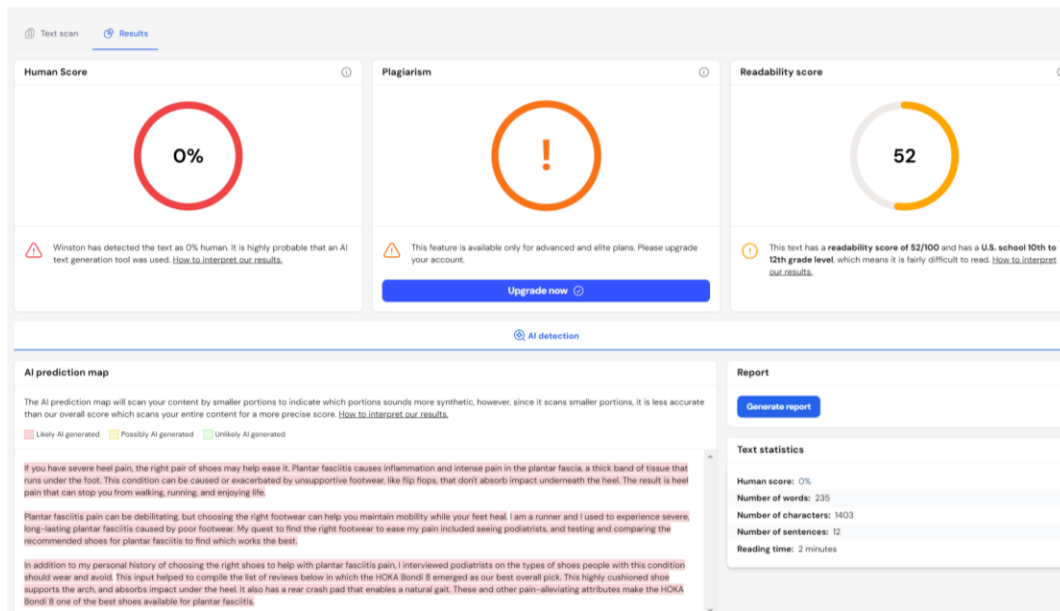

### 5.3.6. Crossplag

#### AI Content Detector (Updated version)

Use our AI Content Detector for free to check if the text is AI-generated - now with higher accuracy!

#### Text box

If you have severe heel pain, the right pair of shoes may help ease it. Plantar fasciitis causes inflammation and intense pain in the plantar fascia, a thick band of tissue that runs under the foot. This condition can be caused or exacerbated by unsupportive footwear, like flip flops, that don't absorb impact underneath the heel. The result is heel pain that can stop you from walking, running, and enjoying life.

Plantar fasciitis pain can be debilitating, but choosing the right footwear can help you maintain mobility while your feet heal. I am a runner and I used to experience severe, long-lasting plantar fasciitis caused by poor footwear. My quest to find the right footwear to ease my pain included seeing podiatrists, and testing and comparing the recommended shoes for plantar fasciitis to find which works the best.

In addition to my personal history of choosing the right shoes to help with plantar fasciitis pain, I interviewed podiatrists on the types of shoes people with this condition should wear and avoid. This input helped to compile the list of reviews below in which the HOKA Bondi 8 emerged as our best overall pick. This highly cushioned shoe supports the arch, and absorbs impact under the heel. It also has a rear crash pad that enables a natural gait. These and other pain-alleviating

235/3000

Check

#### Results

##### AI Content Index<sup>1</sup>

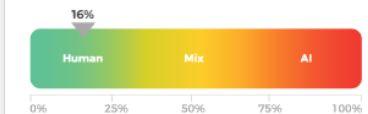

This text is mainly written by a human.

Are you satisfied with the results?

##### Disclaimer

- The AI Content Detector v2.0 is based to check on a deeper level to give more precise results
- The result might take a bit longer to display as the text is checked more thoroughly
- The AI Content Detector v2.0 is now able to analyze up to 3,000 words (compared to the 1,000 words of the first version)
- At this point, the AI Content Detector only works for the English language.

## 6. AI tools

### 6.1. ChatGPT 4o asked to generate random text that doesn't make sense.

write about AI that doesn't make sense

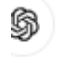

Artificial intelligence is made entirely of invisible circuits that dream of flying to the moon on a piece of toast. Instead of using data, it communicates with jellybeans and relies on cloud-powered unicorns to solve complex equations. AI's true purpose is to translate the secret language of squirrels into perfect symphonies of silence. When machines run out of electricity, they recharge by sipping lemonade through quantum straws and rewire their algorithms using spaghetti noodles. AI also loves to play chess with clouds, but only when the wind is whispering ancient robot jokes.

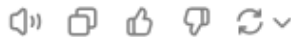

#### 6.1.1. Undetectable AI

READABILITY

University

PURPOSE

General Writing

586/15000 CHARS ≈ 92 WORDS

Artificial intelligence is made entirely of invisible circuits that dream of flying to the moon on a piece of toast. Instead of using data, it communicates with jellybeans and relies on cloud-powered unicorns to solve complex equations. AI's true purpose is to translate the secret language of squirrels into perfect symphonies of silence. When machines run out of electricity, they recharge by sipping lemonade through quantum straws and rewire their algorithms using spaghetti noodles. AI also loves to play chess with clouds, but only when the wind is whispering ancient robot jokes.

WAITING FOR YOUR INPUT

MORE READABLE

BALANCED

MORE HUMAN

☒ I AGREE TO THE TERMS OF SERVICE (NO ACADEMIC MISCONDUCT)

CLEAR

CHECK FOR AI

HUMANIZE

Your content appears human 🍏

AI DETECTION LIKELIHOOD

✓ GPTZERO ✓ OPENAI ✓ WRITER ✓ CROSSPLAG ✓ COPYLEAKS ✓ SAPLING ✓ CONTENTATSCALE ✓ ZEROGPT

KEY: 100% HUMAN 50% HUMAN 0% HUMAN

## 6.1.2. Zero GPT.com

**Your Text is Human written**

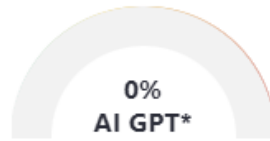

Artificial intelligence is made entirely of invisible circuits that dream of flying to the moon on a piece of toast. Instead of using data, it communicates with jellybeans and relies on cloud-powered unicorns to solve complex equations. AI's true purpose is to translate the secret language of squirrels into perfect symphonies of silence. When machines run out of electricity, they recharge by sipping lemonade through quantum straws and rewire their algorithms using spaghetti noodles. AI also loves to play chess with clouds, but only when the wind is whispering ancient robot jokes.

■ Highlighted text is suspected to be most likely generated by AI\*

 [Export to PDF](#)

### 6.1.3. ZeroGPT.net

 There's a probability that your text is human-written, yet it may include segments generated by GPT.



65.30%

is written by a human



34.70%

is generated by an AI/GPT

[Bookmark This Tool](#)

[Detect new text](#)



Get Started on Google Cloud

Scalable, cost efficient VMs...

[Open](#)



Get Started on Google Cloud

From general purpose to...

[Open](#)

Artificial intelligence is made entirely of invisible circuits that dream of flying to the moon on a piece of toast. Instead of using data, it communicates with jellybeans and relies on cloud-powered unicorns to solve complex equations. AI's true purpose is to translate the secret language of squirrels into perfect symphonies of silence. When machines run out of electricity, they recharge by sipping lemonade through quantum straws and rewire their algorithms using spaghetti noodles. AI also loves to play chess with clouds, but only when the wind is whispering ancient robot jokes.

[Detect new text](#)

## 6.1.4. Brandwell.ai

### AI Checker

The real-time AI Detector identifies text created by ChatGPT, Gemini, Claude, and various other language models. The real-time AI Checker, features a proprietary tech stack that works deeper than a generic AI classifier to find robotic sounding content. Focusing exclusively on website pages, blog posts, social media content, and email marketing messages. Paste your content below and start your free scan.

Artificial intelligence is made entirely of invisible circuits that dream of flying to the moon on a piece of toast. Instead of using data, it communicates with jellybeans and relies on cloud-powered unicorns to solve complex equations. AI's true purpose is to translate the secret language of squirrels into perfect symphonies of silence. When machines run out of electricity, they recharge by sipping lemonade through quantum straws and rewire their algorithms using spaghetti noodles. AI also loves to play chess with clouds, but only when the wind is whispering ancient robot jokes.

586 / 2500 Characters

#### Human Probability Results

😊 **PASSES AS HUMAN!**



Predicted based upon **93 words**. [Increase this limit.](#)

**What's Next?** Looking to grow your brand? BrandWell optimizes out-of-date content, creates new undetectable, high-quality

## 6.1.5. Winston AI

Text scan

Results

#### Human Score

96%

Winston has detected the text as 96% human. Our scan was unable to detect material use of AI text generation tools. [How to interpret our results.](#)

#### Plagiarism

!

This feature is available only for advanced and elite plans. Please upgrade your account.

[Upgrade now](#)

#### Readability score

35

This text has a **readability score of 35/100** and has a **U.S. school College level**, which means it is difficult to read. [How to interpret our results.](#)

#### AI prediction map

The AI prediction map will scan your content by smaller portions to indicate which portions sounds more synthetic, however, since it scans smaller portions, it is less accurate than our overall score which scans your entire content for a more precise score. [How to interpret our results.](#)

Likely AI generated Possibly AI generated Unlikely AI generated

Artificial intelligence is made entirely of invisible circuits that dream of flying to the moon on a piece of toast. Instead of using data, it communicates with jellybeans and relies on cloud-powered unicorns to solve complex equations. AI's true purpose is to translate the secret language of squirrels into perfect symphonies of silence. When machines run out of electricity, they recharge by sipping lemonade through quantum straws and rewire their algorithms using spaghetti noodles. AI also loves to play chess with clouds, but only when the wind is whispering ancient robot jokes.

Artificial intelligence is made entirely

#### Report

[Generate report](#)

#### Text statistics

|                       |           |
|-----------------------|-----------|
| Human score:          | 96%       |
| Number of words:      | 98        |
| Number of characters: | 628       |
| Number of sentences:  | 6         |
| Reading time:         | 1 minutes |

## 6.1.6. Crossplag

AI Content Detector

### AI Content Detector (Updated version)

Use our AI Content Detector for free to check if the text is AI-generated - now with higher accuracy!

Text box

Artificial intelligence is made entirely of invisible circuits that dream of flying to the moon on a piece of toast. Instead of using data, it communicates with jellybeans and relies on cloud-powered unicorns to solve complex equations. AI's true purpose is to translate the secret language of squirrels into perfect symphonies of silence. When machines run out of electricity, they recharge by sipping lemonade through quantum straws and rewire their algorithms using spaghetti noodles. AI also loves to play chess with clouds, but only when the wind is whispering ancient robot jokes.

Artificial intelligence is made entirely

96/3000

Check

Results

AI Content Index<sup>®</sup>

0%

Human

Mid

AI

0%

25%

50%

75%

100%

This text is mainly written by a human.

Are you satisfied with the results?

Disclaimer

- The AI Content Detector v2.0 is based to check on a deeper level to give more precise results
- The result might take a bit longer to display as the text is checked more thoroughly
- The AI Content Detector v2.0 is now able to analyze up to 3,000 words (compared to the 1,000 words of the first version)
- At this point, the AI Content Detector only works for the English language.

84



## 6.2. ChatGPT 4o asked to use the wrong grammar intentionally

Write about AI in two paragraphs and intentionally use wrong grammar

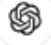

Artificial intelligence have been growing so fast in many areas like businesses and education. It help peoples to make decisions quicker and also does jobs that are boring for humans to do all the times. Companies is using AI to look at big numbers and datas and figure out what is happening. Some peoples think that AI is going to do all the works in future and take human jobs away, but other say that AI is just a tool to make life easier.

Even though AI be smart, it don't always work good. Sometimes it make wrong choices or give answers that ain't right because the information it gets is not perfect. If the data is bad, AI will also be bad. Also, there be some jobs that only humans can do, like being creative or making hard decisions. So, AI are helpful but it's not going to replace everything humans can do.

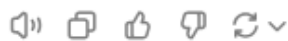

## 6.2.1. Undetectable AI

READABILITY

University

PURPOSE

General Writing

820/15000 CHARS = 154 WORDS

Artificial intelligence have been growing so fast in many areas like businesses and education. It help peoples to make decisions quicker and also does jobs that are boring for humans to do all the times. Companies is using AI to look at big numbers and datas and figure out what is happening. Some peoples think that AI is going to do all the works in future and take human jobs away, but other say that AI is just a tool to make life easier.

Even though AI be smart, it don't always work good. Sometimes it make wrong choices or give answers that ain't right because the information it gets is not perfect. If the data is bad, AI will also be bad. Also, there be some jobs that only humans can do, like being creative or making hard decisions. So, AI are helpful but it's not going to replace everything humans can do.

WAITING FOR YOUR INPUT

MORE READABLE

BALANCED

MORE HUMAN

☒ I AGREE TO THE TERMS OF SERVICE (NO ACADEMIC MISCONDUCT)

CLEAR

CHECK FOR AI

HUMANIZE

Your content appears human 👍

AI DETECTION LIKELIHOOD

✓ GPTZERO ✓ OPENAI ✓ WRITER ✓ CROSSPLAG ✓ COPYLEAKS ✓ SAPLING ✓ CONTENTATSCALE ✓ ZEROGPT

KEY: 100% HUMAN 50% HUMAN 0% HUMAN

## 6.2.2. Zero GPT.com

Your Text is Human written

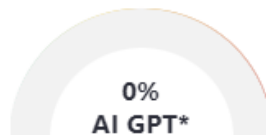

Artificial intelligence have been growing so fast in many areas like businesses and education. It help peoples to make decisions quicker and also does jobs that are boring for humans to do all the times. Companies is using AI to look at big numbers and datas and figure out what is happening. Some peoples think that AI is going to do all the works in future and take human jobs away, but other say that AI is just a tool to make life easier.

Even though AI be smart, it don't always work good. Sometimes it make wrong choices or give answers that ain't right because the information it gets is not perfect. If the data is bad, AI will also be bad. Also, there be some jobs that only humans can do, like being creative or making hard decisions. So, AI are helpful but it's not going to replace everything humans can do.

■ Highlighted text is suspected to be most likely generated by AI\*

Export to PDF

### 6.2.3. ZeroGPT.net

👤 There's a probability that your text is human-written, yet it may include segments generated by GPT.

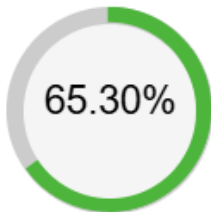

is written by a human

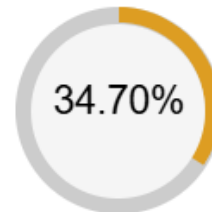

is generated by an AI/GPT

🔖 Bookmark This Tool

Detect new text

Artificial intelligence have been growing so fast in many areas like businesses and education. It help peoples to make decisions quicker and also does jobs that are boring for humans to do all the times. Companies is using AI to look at big numbers and datas and figure out what is happening. Some peoples think that AI is going to do all the works in future and take human jobs away, but other say that AI is just a tool to make life easier.

Even though AI be smart, it don't always work good. Sometimes it make wrong choices or give answers that ain't right because the information it gets is not perfect. If the data is bad, AI will also be bad. Also, there be some jobs that only humans can do, like being creative or making hard decisions. So, AI are helpful but it's not going to replace everything humans can do.

Detect new text

## 6.2.4. Brandwell.ai

### AI Checker

The real-time AI Detector identifies text created by ChatGPT, Gemini, Claude, and various other language models. The real-time AI Checker, features a proprietary tech stack that works deeper than a generic AI classifier to find robotic sounding content. Focusing exclusively on website pages, blog posts, social media content, and email marketing messages. Paste your content below and start your free scan.

Artificial intelligence have been growing so fast in many areas like businesses and education. It help peoples to make decisions quicker and also does jobs that are boring for humans to do all the times, Companies is using AI to look at big numbers and datas and figure out what is happening. Some peoples think that AI is going to do all the works in future and take human jobs away, but other say that AI is just a tool to make life easier.

Even though AI be smart, it don't always work good. Sometimes it make wrong choices or give answers that ain't right because the information it gets is not perfect. If the data is bad, AI will also be bad. Also, there be some jobs that only humans can do, like being creative or making hard decisions. So, AI are helpful but it's not going to replace everything humans can do.

819 / 2500 Characters

#### Human Probability Results

😊 **PASSES AS HUMAN!**



Predicted based upon 157 words. [Increase this limit.](#)

**What's Next?** Looking to grow your brand? BrandWell optimizes out-of-date content, creates new undetectable, high-quality content, and builds links to your sites through our Brand Publisher Network.

## 6.2.5. Winston AI

Text scan

Results

Human Score

98%

Winston has detected the text as 98% human. Our scan was unable to detect material use of AI text generation tools. [How to interpret our results.](#)

Plagiarism

!

This feature is available only for advanced and elite plans. Please upgrade your account.

Upgrade now

Readability score

62

This text has a readability score of 62/100 and has a U.S. school 8th and 9th grade level, which means it is plain english and easily understood by 13-16 year-old students. [How to interpret our results.](#)

AI detection

AI prediction map

The AI prediction map will scan your content by smaller portions to indicate which portions sounds more synthetic, however, since it scans smaller portions, it is less accurate than our overall score which scans your entire content for a more precise score. [How to interpret our results.](#)

Likely AI generated

Possibly AI generated

Unlikely AI generated

Artificial intelligence have been growing so fast in many areas like businesses and education. It help peoples to make decisions quicker and also does jobs that are boring for humans to do all the times. Companies is using AI to look at big numbers and datas and figure out what is happening. Some peoples think that AI is going to do all the works in future and take human jobs away, but other say that AI is just a tool to make life easier.

Even though AI be smart, it don't always work good. Sometimes it make wrong choices or give answers that ain't right because the information it gets is not perfect. If the data is bad, AI will also be bad. Also, there be some jobs that only humans can do, like being creative or making hard decisions. So, AI are helpful but it's not going to replace everything humans can do.

Report

Generate report

Text statistics

Human score: 98%

Number of words: 157

Number of characters: 620

Number of sentences: 9

Reading time: 1 minutes

## 6.2.6. Crossplag

AI Content Detector

AI Content Detector (Updated version)

Use our AI Content Detector for free to check if the text is AI-generated - now with higher accuracy!

Text box

Artificial intelligence have been growing so fast in many areas like businesses and education. It help peoples to make decisions quicker and also does jobs that are boring for humans to do all the times. Companies is using AI to look at big numbers and datas and figure out what is happening. Some peoples think that AI is going to do all the works in future and take human jobs away, but other say that AI is just a tool to make life easier.

Even though AI be smart, it don't always work good. Sometimes it make wrong choices or give answers that ain't right because the information it gets is not perfect. If the data is bad, AI will also be bad. Also, there be some jobs that only humans can do, like being creative or making hard decisions. So, AI are helpful but it's not going to replace everything humans can do.

153/3000

Check

Results

AI Content Index<sup>®</sup>

0%

Human

Mix

AI

0%

25%

50%

75%

100%

This text is mainly written by a human.

Are you satisfied with the results?  

Disclaimer

- The AI Content Detector v2.0 is based to check on a deeper level to give more precise results
- The result might take a bit longer to display as the text is checked more thoroughly
- The AI Content Detector v2.0 is now able to analyze up to 3,000 words (compared to the 1,000 words of the first version)
- At this point, the AI Content Detector only works for the English language.

89

### 6.3. ChatGPT 4o asked to rewrite human-written text

ChatGPT 4o ▾

rewrite the following: There is and has been a fruitful flow of concepts and ideas between studies of learning in biological and artificial systems. Much early work that led to the development of reinforcement learning (RL) algorithms for artificial systems was inspired by learning rules first developed in biology by Bush and Mosteller, and Rescorla and Wagner. More recently, temporal-difference RL, developed for learning in artificial agents, has provided a foundational framework for interpreting the activity of dopamine neurons. In this Review, we describe state-of-the-art work on RL in biological and artificial agents. We focus on points of contact between these disciplines and identify areas where future research can benefit from information flow between these fields. Most work in biological systems has focused on simple learning problems, often embedded in dynamic environments where flexibility and ongoing learning are important, similar to real-world learning problems faced by biological systems. In contrast, most work in artificial agents has focused on learning a single complex problem in a static environment. Moving forward, work in each field will benefit from a flow of ideas that represent the strengths within each discipline.

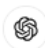

There has long been a productive exchange of concepts between studies of learning in biological and artificial systems. Much of the early development of reinforcement learning (RL) algorithms for artificial systems was inspired by learning models first introduced in biology by Bush and Mosteller, and Rescorla and Wagner. More recently, temporal-difference RL, originally designed for artificial agents, has become a key framework for understanding the activity of dopamine neurons. In this review, we discuss cutting-edge research on RL in both biological and artificial systems, highlighting areas where these fields intersect and where future research can benefit from the exchange of ideas. Biological systems typically focus on simple learning tasks in dynamic environments, where adaptability and continuous learning are crucial—similar to real-world scenarios faced by living organisms. On the other hand, artificial systems often tackle a single, complex problem in a static environment. As both fields evolve, each will gain from incorporating the strengths and insights of the other.

🔊 📄 👍 🗨️ ↺ ▾

### 6.3.1. Undetectable AI

READABILITY

University

PURPOSE

General Writing

1094/15000 CHARS ≈ 158 WORDS

There has long been a productive exchange of concepts between studies of learning in biological and artificial systems. Much of the early development of reinforcement learning (RL) algorithms for artificial systems was inspired by learning models first introduced in biology by Bush and Mosteller, and Rescorla and Wagner. More recently, temporal-difference RL, originally designed for artificial agents, has become a key framework for understanding the activity of dopamine neurons. In this review, we discuss cutting-edge research on RL in both biological and artificial systems, highlighting areas where these fields intersect and where future research can benefit from the exchange of ideas. Biological systems typically focus on simple learning tasks in dynamic environments, where adaptability and continuous learning are crucial — similar to real-world scenarios faced by living organisms. On the other hand, artificial systems often tackle a single, complex problem in a static environment. As both fields evolve, each will gain from incorporating the strengths and

WAITING FOR YOUR INPUT

MORE READABLE

BALANCED

MORE HUMAN

☒ I AGREE TO THE TERMS OF SERVICE (NO ACADEMIC MISCONDUCT)

CLEAR

CHECK FOR AI

HUMANIZE

⚠️ Your content is detected as written by AI ⚠️

AI DETECTION LIKELIHOOD

⚠️ GPTZERO ⚠️ OPENAI ⚠️ WRITER ⚠️ CROSSPLAG ⚠️ COPYLEAKS ⚠️ SAPLING ⚠️ CONTENTATSCALE ⚠️ ZEROGPT

KEY: 100% HUMAN 50% HUMAN 0% HUMAN

### 6.3.2. Zero GPT.com

Your Text is Human written

0%

AI GPT\*

There has long been a productive exchange of concepts between studies of learning in biological and artificial systems. Much of the early development of reinforcement learning (RL) algorithms for artificial systems was inspired by learning models first introduced in biology by Bush and Mosteller, and Rescorla and Wagner. More recently, temporal-difference RL, originally designed for artificial agents, has become a key framework for understanding the activity of dopamine neurons. In this review, we discuss cutting-edge research on RL in both biological and artificial systems, highlighting areas where these fields intersect and where future research can benefit from the exchange of ideas. Biological systems typically focus on simple learning tasks in dynamic environments, where adaptability and continuous learning are crucial—similar to real-world scenarios faced by living organisms. On the other hand, artificial systems often tackle a single, complex problem in a static environment. As both fields evolve, each will gain from incorporating the strengths and insights of the other.

Highlighted text is suspected to be most likely generated by AI\*

PDF

Export to PDF

### 6.3.3. ZeroGPT.net

👉 Your text is most likely the work of a human author.

85.30%

is written by a human

14.70%

is generated by an AI/GPT

[Bookmark This Tool](#)[Detect new text](#)

VOLUNTEER  
FOSTER  
DONATE  
ADOPT

THE ANIMAL  
PAD

DONATE

Learning about and  
supporting education  
and science today

There has long been a productive exchange of concepts between studies of learning in biological and artificial systems. Much of the early development of reinforcement learning (RL) algorithms for artificial systems was inspired by learning models first introduced in biology by Bush and Mosteller, and Rescorla and Wagner. More recently, temporal-difference RL, originally designed for artificial agents, has become a key framework for understanding the activity of dopamine neurons. In this review, we discuss cutting-edge research on RL in both biological and artificial systems, highlighting areas where these fields intersect and where future research can benefit from the exchange of ideas. Biological systems typically focus on simple learning tasks in dynamic environments, where adaptability and continuous learning are crucial—similar to real-world scenarios faced by living organisms. On the other hand, artificial systems often tackle a single, complex problem in a static environment. As both fields evolve, each will gain from incorporating the strengths and insights of the other.

[Detect new text](#)

92



## 6.3.4. Brandwell.ai

There has long been a productive exchange of concepts between studies of learning in biological and artificial systems. Much of the early development of reinforcement learning (RL) algorithms for artificial systems was inspired by learning models first introduced in biology by Bush and Mosteller, and Rescorla and Wagner. More recently, temporal-difference RL, originally designed for artificial agents, has become a key framework for understanding the activity of dopamine neurons. In this review, we discuss cutting-edge research on RL in both biological and artificial systems, highlighting areas where these fields intersect and where future research can benefit from the exchange of ideas. Biological systems typically focus on simple learning tasks in dynamic environments, where adaptability and continuous learning are crucial—similar to real-world scenarios faced by living organisms. On the other hand, artificial systems often tackle a single, complex problem in a static environment. As both fields evolve, each will gain from incorporating the strengths and insights of the other.

1094 / 2500 Characters

### Is it Human?

Our artificial intelligence detection software tells you if what you have reads like it is written by a human or if it sounds robotic. The AI Detector tries to forecast if your content is written by an LLM, or humanly written. With robotic-sounding content placing you in a position of inauthenticity, the need for a ChatGPT Detector is higher than ever.

#### Human Probability Results

😞 READS LIKE AI!!

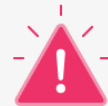

## 6.3.5. Winston AI

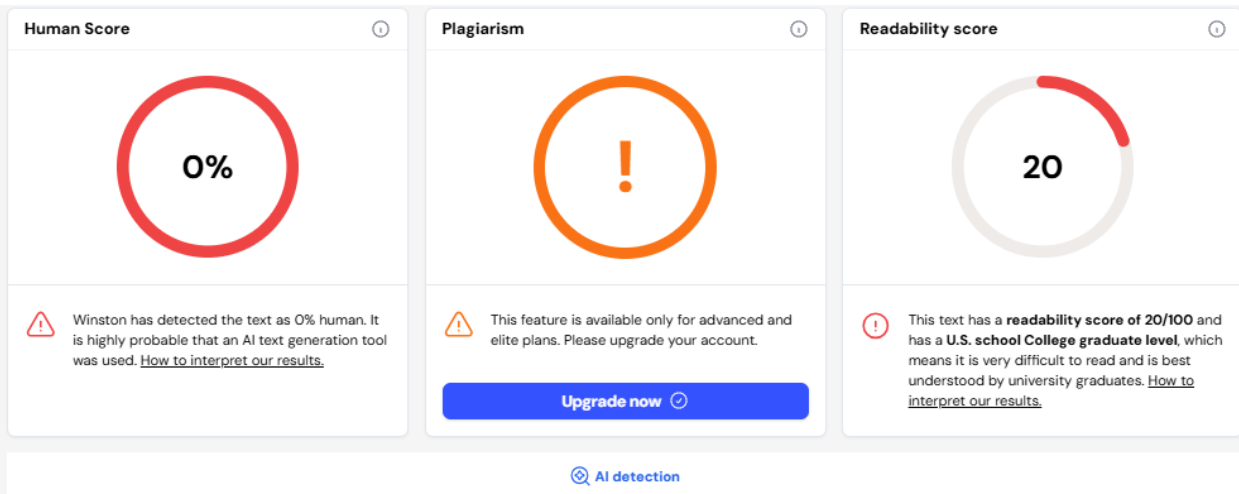

### AI prediction map

The AI prediction map will scan your content by smaller portions to indicate which portions sounds more synthetic, however, since it scans smaller portions, it is less accurate than our overall score which scans your entire content for a more precise score. [How to interpret our results](#).

■ Likely AI generated ■ Possibly AI generated ■ Unlikely AI generated

There has long been a productive exchange of concepts between studies of learning in biological and artificial systems. Much of the early development of reinforcement learning (RL) algorithms for artificial systems was inspired by learning models first introduced in biology by Bush and Mosteller, and Rescorla and Wagner. More recently, temporal-difference RL, originally designed for artificial agents, has become a key framework for understanding the activity of dopamine neurons. In this review, we discuss cutting-edge research on RL in both biological and artificial systems, highlighting areas where these fields intersect and where future research can benefit from the exchange of ideas. Biological systems typically focus on simple learning tasks in dynamic environments, where adaptability and continuous learning are crucial—similar to real-world scenarios faced by living organisms. On the other hand, artificial systems often tackle a single, complex problem in a static environment. As both fields evolve, each will gain from incorporating the strengths and insights of the other.

### Report

[Generate report](#)

### Text statistics

Human score: 0%  
Number of words: 159  
Number of characters: 1094  
Number of sentences: 7  
Reading time: 1 minutes

## 6.3.6. Crossplag

AI Content Detector

AI Content Detector (Updated version)

Use our AI Content Detector for free to check if the text is AI-generated - now with higher accuracy!

Text box

There has long been a productive exchange of concepts between studies of learning in biological and artificial systems. Much of the early development of reinforcement learning (RL) algorithms for artificial systems was inspired by learning models first introduced in biology by Bush and Mosteller, and Rescorla and Wagner. More recently, temporal-difference RL, originally designed for artificial agents, has become a key framework for understanding the activity of dopamine neurons. In this review, we discuss cutting-edge research on RL in both biological and artificial systems, highlighting areas where these fields intersect and where future research can benefit from the exchange of ideas. Biological systems typically focus on simple learning tasks in dynamic environments, where adaptability and continuous learning are crucial—similar to real-world scenarios faced by living organisms. On the other hand, artificial systems often tackle a single, complex problem in a static environment. As both fields evolve, each will gain from incorporating the strengths and insights of the other.

158/3000

Check

Results

AI Content Index<sup>®</sup>

0%

Human

Mix

AI

0%

25%

50%

75%

100%

This text is mainly written by a human.

Are you satisfied with the results?  

Disclaimer

- The AI Content Detector v2.0 is based to check on a deeper level to give more precise results
- The result might take a bit longer to display as the text is checked more thoroughly
- The AI Content Detector v2.0 is now able to analyze up to 3,000 words (compared to the 1,000 words of the first version)
- At this point, the AI Content Detector only works for the English language.

94

## **7. Changes with a minor change in the text and punctuation**

### **7.1. The following two paragraphs taken from the News page of Stanford University are used for this purpose [29]**

**Link: <https://news.stanford.edu/stories/2024/10/stanford-launches-center-focused-on-human-and-planetary-health>**

The journey to establish the center began in 2015, when Stanford launched the Program for Disease, Ecology, Health, and the Environment. Over time, a core group of faculty and researchers grew into a community of more than 130 scholars, coalescing after hosting the Planetary Health Alliance's 500-person conference on campus. In 2021, the program solidified its strategic vision through a series of ideation workshops with over 100 leaders across Stanford, and in 2023 the program formally became the Human and Planetary Health Initiative (HPH).

The new center focuses on four research areas: Climate and Health, Pollution and Health, Disease Ecology in a Changing World (DECO), and Food Systems, Health, and the Environment. DECO, led by Erin Mordecai, an associate professor of biology in the School of Humanities and Sciences, and Giulio De Leo, a professor of oceans and of Earth system science at the Stanford Doerr School of Sustainability, recently launched three partner-oriented research projects focused on how global environmental changes impact disease transmission.

### 7.1.1. Zero GPT.com

**Your Text is AI/GPT Generated**

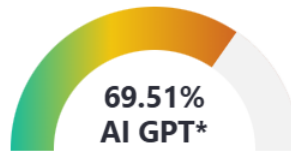

The journey to establish the center began in 2015, when Stanford launched the Program for Disease, Ecology, Health, and the Environment. Over time, a core group of faculty and researchers grew into a community of more than 130 scholars, coalescing after hosting the Planetary Health Alliance's 500-person conference on campus. In 2021, the program solidified its strategic vision through a series of ideation workshops with over 100 leaders across Stanford, and in 2023 the program formally became the Human and Planetary Health Initiative (HPH).

The new center focuses on four research areas: Climate and Health, Pollution and Health, Disease Ecology in a Changing World (DECO), and Food Systems, Health, and the Environment. DECO, led by Erin Mordecai, an associate professor of biology in the School of Humanities and Sciences, and Giulio De Leo, a professor of oceans and of Earth system science at the Stanford Doerr School of Sustainability, recently launched three partner-oriented research projects focused on how global environmental changes impact disease transmission.

**Make your text human**

**So it becomes undetectable**

■ Highlighted text is suspected to be most likely generated by AI\*

 **Export to PDF**

## 7.1.2. ZeroGPT.net

🤖 It's highly probable that your text is GPT-generated.

30.79%

is written by a human

69.21%

is generated by an AI/GPT

Bookmark This Tool

Detect new text

\*The highlighted text appears to have been generated by an AI system.

The journey to establish the center began in 2015, when Stanford launched the Program for Disease, Ecology, Health, and the Environment. Over time, a core group of faculty and researchers grew into a community of more than 130 scholars, coalescing after hosting the Planetary Health Alliance's 500-person conference on campus. In 2021, the program solidified its strategic vision through a series of ideation workshops with over 100 leaders across Stanford, and in 2023 the program formally became the Human and Planetary Health Initiative (HPH).

The new center focuses on four research areas: Climate and Health, Pollution and Health, Disease Ecology in a Changing World (DECO), and Food Systems, Health, and the Environment. DECO, led by Erin Mordecai, an associate professor of biology in the School of Humanities and Sciences, and Giulio De Leo, a professor of oceans and of Earth system science at the Stanford Doerr School of Sustainability, recently launched three partner-oriented research projects focused on how global environmental changes impact disease transmission.

Detect new text

## 7.1.3. Brandwell.ai

The journey to establish the center began in 2015, when Stanford launched the Program for Disease, Ecology, Health, and the Environment. Over time, a core group of faculty and researchers grew into a community of more than 130 scholars, coalescing after hosting the Planetary Health Alliance's 500-person conference on campus. In 2021, the program solidified its strategic vision through a series of ideation workshops with over 100 leaders across Stanford, and in 2023 the program formally became the Human and Planetary Health Initiative (HPH).

The new center focuses on four research areas: Climate and Health, Pollution and Health, Disease Ecology in a Changing World (DECO), and Food Systems, Health, and the Environment. DECO, led by Erin Mordecai, an associate professor of biology in the School of Humanities and Sciences, and Giulio De Leo, a professor of oceans and of Earth system science at the Stanford Doerr School of Sustainability, recently launched three partner-oriented research projects focused on how global environmental changes impact disease transmission.

1079 / 2500 Characters

### Is it Human?

Our artificial intelligence detection software tells you if what you have reads like it is written by a human or if it sounds robotic. The AI Detector tries to forecast if your content is written by an LLM, or humanly written. With robotic-sounding content placing you in a position of inauthenticity, the need for a ChatGPT Detector is higher than ever.

Human Probability Results

😞 READS LIKE AI!

# 7.1.4. Winston AI

Text scan

Results

Human score

3%

Winston has detected the text as 3% human. It is highly probable that an AI text generation tool was used. [How to interpret our results.](#)

Plagiarism

!

This feature is available only for advanced and elite plans. Please upgrade your account.

Upgrade now

Readability score

25

This text has a **readability score of 25/100** and has a **U.S. school College graduate level**, which means it is very difficult to read and is best understood by university graduates. [How to interpret our results.](#)

AI detection

AI prediction map

The AI prediction map will scan your content by smaller portions to indicate which portions sounds more synthetic, however, since it scans smaller portions, it is less accurate than our overall score which scans your entire content for a more precise score. [How to interpret our results.](#)

Likely AI generated

Possibly AI generated

Unlikely AI generated

The journey to establish the center began in 2015, when Stanford launched the Program for Disease, Ecology, Health, and the Environment. Over time, a core group of faculty and researchers grew into a community of more than 130 scholars, coalescing after hosting the Planetary Health Alliance's 500-person conference on campus. In 2021, the program solidified its strategic vision through a series of ideation workshops with over 100 leaders across Stanford, and in 2023 the program formally became the Human and Planetary Health Initiative (HPHI).

The new center focuses on four research areas: Climate and Health, Pollution and Health, Disease Ecology in a Changing World (DECO), and Food Systems, Health, and the Environment. DECO, led by Erin Mordecai, an associate professor of biology in the School of Humanities and Sciences, and Giulio De Leo, a professor of oceans and of Earth system science at the Stanford Doerr School of Sustainability, recently launched three partner-oriented research projects focused on how global environmental changes impact disease transmission.

Report

Generate report

Text statistics

Human score: 3%

Number of words: 160

Number of characters: 1080

Number of sentences: 5

Reading time: 1 minutes

98

## 7.2. The word “disease” was deleted from the last sentence of the second paragraph

### 7.2.1. Zero GPT.com

**Your Text is Human written**

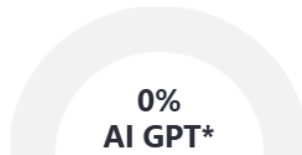

The journey to establish the center began in 2015, when Stanford launched the Program for Disease, Ecology, Health, and the Environment. Over time, a core group of faculty and researchers grew into a community of more than 130 scholars, coalescing after hosting the Planetary Health Alliance’s 500-person conference on campus. In 2021, the program solidified its strategic vision through a series of ideation workshops with over 100 leaders across Stanford, and in 2023 the program formally became the Human and Planetary Health Initiative (HPH).

The new center focuses on four research areas: Climate and Health, Pollution and Health, Disease Ecology in a Changing World (DECO), and Food Systems, Health, and the Environment. DECO, led by Erin Mordecai, an associate professor of biology in the School of Humanities and Sciences, and Giulio De Leo, a professor of oceans and of Earth system science at the Stanford Doerr School of Sustainability, recently launched three partner-oriented research projects focused on how global environmental changes impact transmission.

**■ Highlighted text is suspected to be most likely generated by AI\***

 **Export to PDF**

## 7.2.2. ZeroGPT.net

👉 Your text is authentically human-written.

We have great confidence that this text is fully Human

99.30%

is written by a human

0.70%

is generated by an AI/GPT

[Bookmark This Tool](#)

[Detect new text](#)

The journey to establish the center began in 2015, when Stanford launched the Program for Disease, Ecology, Health, and the Environment. Over time, a core group of faculty and researchers grew into a community of more than 130 scholars, coalescing after hosting the Planetary Health Alliance's 500-person conference on campus. In 2021, the program solidified its strategic vision through a series of ideation workshops with over 100 leaders across Stanford, and in 2023 the program formally became the Human and Planetary Health Initiative (HPH).

The new center focuses on four research areas: Climate and Health, Pollution and Health, Disease Ecology in a Changing World (DECO), and Food Systems, Health, and the Environment. DECO, led by Erin Mordecai, an associate professor of biology in the School of Humanities and Sciences, and Giulio De Leo, a professor of oceans and of Earth system science at the Stanford Doerr School of Sustainability, recently launched three partner-oriented research projects focused on how global environmental changes impact transmission.

[Detect new text](#)



### 7.3. The punctuation “:” changed to full stop in the first sentence of the second paragraph

#### 7.3.1. Zero GPT.com

**Your Text is AI/GPT Generated**

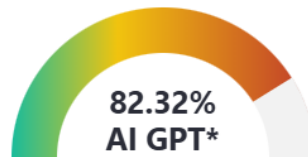

The journey to establish the center began in 2015, when Stanford launched the Program for Disease, Ecology, Health, and the Environment. Over time, a core group of faculty and researchers grew into a community of more than 130 scholars, coalescing after hosting the Planetary Health Alliance's 500-person conference on campus. In 2021, the program solidified its strategic vision through a series of ideation workshops with over 100 leaders across Stanford, and in 2023 the program formally became the Human and Planetary Health Initiative (HPH).

The new center focuses on four research areas. Climate and Health, Pollution and Health, Disease Ecology in a Changing World (DECO), and Food Systems, Health, and the Environment. DECO, led by Erin Mordecai, an associate professor of biology in the School of Humanities and Sciences, and Giulio De Leo, a professor of oceans and of Earth system science at the Stanford Doerr School of Sustainability, recently launched three partner-oriented research projects focused on how global environmental changes impact disease transmission.

**Make your text human**

**So it becomes undetectable**

■ Highlighted text is suspected to be most likely generated by AI\*

 [Export to PDF](#)

### 7.3.2. ZeroGPT.net

👉 Your text is authentically human-written.

We have great confidence that this text is fully Human

99.30%

is written by a human

0.70%

is generated by an AI/GPT

Bookmark This Tool

Detect new text



The journey to establish the center began in 2015, when Stanford launched the Program for Disease, Ecology, Health, and the Environment. Over time, a core group of faculty and researchers grew into a community of more than 130 scholars, coalescing after hosting the Planetary Health Alliance's 500-person conference on campus. In 2021, the program solidified its strategic vision through a series of ideation workshops with over 100 leaders across Stanford, and in 2023 the program formally became the Human and Planetary Health Initiative (HPH).

The new center focuses on four research areas: Climate and Health, Pollution and Health, Disease Ecology in a Changing World (DECO), and Food Systems, Health, and the Environment. DECO, led by Erin Mordecai, an associate professor of biology in the School of Humanities and Sciences, and Giulio De Leo, a professor of oceans and of Earth system science at the Stanford Doerr School of Sustainability, recently launched three partner-oriented research projects focused on how global environmental changes impact disease transmission.

Detect new text

### 7.3.3. Brandwell.ai

The journey to establish the center began in 2015, when Stanford launched the Program for Disease, Ecology, Health, and the Environment. Over time, a core group of faculty and researchers grew into a community of more than 130 scholars, coalescing after hosting the Planetary Health Alliance's 500-person conference on campus. In 2021, the program solidified its strategic vision through a series of ideation workshops with over 100 leaders across Stanford, and in 2023 the program formally became the Human and Planetary Health Initiative (HPH).

The new center focuses on four research areas: Climate and Health, Pollution and Health, Disease Ecology in a Changing World (DECO), and Food Systems, Health, and the Environment. DECO, led by Erin Mordecai, an associate professor of biology in the School of Humanities and Sciences, and Giulio De Leo, a professor of oceans and of Earth system science at the Stanford Doerr School of Sustainability, recently launched three partner-oriented research projects focused on how global environmental changes impact disease transmission.

1079 / 2500 Characters

#### Is it Human?

Our artificial intelligence detection software tells you if what you have reads like it is written by a human or if it sounds robotic. The AI Detector tries to forecast if your content is written by an LLM, or humanly written. With robotic-sounding content placing you in a position of inauthenticity, the need for a ChatGPT Detector is higher than ever.

Human Probability Results

😬 HARD TO TELL!

?
